# Supplementary material for: RNA-Sequencing-Based Transcriptomic Analysis Reveals a Role for Annexin-A1 in Classical and Influenza A Virus-Induced Autophagy
Source: MDPI journal article supplement (doi:10.3390/cells9061399), 2020-06-04
Supplement: s1 [file s1]

| Result                            | Query tag                | Search result            | Query type        | Mismatch | Ends with RG | Chr Position           | Strand | Cut site | Score |
|-----------------------------------|--------------------------|--------------------------|-------------------|----------|--------------|------------------------|--------|----------|-------|
| ATGCAAGGCAGCGACATCCGAGG -- hit    | Query:                   | hit:                     | No indel          | 0        | Yes          | Chr9:73158762-73158784 | -      | 73158768 | 0     |
| ATGCAAGGCAGCGACATCCGNGG -- query  | ATGCAAGGCAGCGACATCCGNGG  | ATGCAAGGCAGCGACATCCGAGG  |                   |          |              |                        |        |          |       |
| TGCAAGGCAGCGACATCCGAGG -- hit     | Query:                   | hit:                     | Del 20            | 0        | Yes          | Chr9:73158762-73158783 | -      | 73158768 | 0.63  |
| TGCAAGGCAGCGACATCCGNGG -- query   | TGCAAGGCAGCGACATCCGNGG   | TGCAAGGCAGCGACATCCGAGG   |                   |          |              |                        |        |          |       |
| TGCAAGGCAGCGACATCCGAGG -- hit     | Query:                   | hit:                     | Del 19            | 1        | Yes          | Chr9:73158762-73158783 | -      | 73158768 | 0.76  |
| AGCAAGGCAGCGACATCCGNGG -- query   | AGCAAGGCAGCGACATCCGNGG   | TGCAAGGCAGCGACATCCGAGG   |                   |          |              |                        |        |          |       |
| ATGCAAGGCAGCGACATCCGAG -- hit     | Query:                   | hit:                     | Del 1             | 1        | Yes          | Chr9:73158763-73158784 | -      | 73158769 | 26.51 |
| ATGCAAGGCAGCGACATCCNGG -- query   | ATGCAAGGCAGCGACATCCNGG   | ATGCAAGGCAGCGACATCCGAG   |                   |          |              |                        |        |          |       |
| ATGCAAGGCAGCGACATCCGAG -- hit     | Query:                   | hit:                     | Del PAM 3         | 1        | Yes          | Chr9:73158763-73158784 | -      | 73158769 | 40.51 |
| ATGCAAGGCAGCGACATCCGGG -- query   | ATGCAAGGCAGCGACATCCGGG   | ATGCAAGGCAGCGACATCCGAG   | Del PAM 1, or Del |          |              |                        |        |          |       |
| ATGCAAGGCAGCGACATCCGAG -- hit     | Query:                   | hit:                     | PAM 2             | 0        | Yes          | Chr9:73158763-73158784 | -      | 73158769 | 20.51 |
| ATGCAAGGCAGCGACATCCGNG -- query   | ATGCAAGGCAGCGACATCCGNG   | ATGCAAGGCAGCGACATCCGAG   |                   |          |              |                        |        |          |       |
| TATGCAAGGCAGCGACATCCGAGG -- hit   | Query:                   | hit:                     | Ins 19            | 1        | Yes          | Chr9:73158762-73158785 | -      | 73158768 | 0.95  |
| ANTGCAAGGCAGCGACATCCGNGG -- query | ANTGCAAGGCAGCGACATCCGNGG | TATGCAAGGCAGCGACATCCGAGG | Ins PAM 2, or Ins |          |              |                        |        |          |       |
| ATGCAAGGCAGCGACATCCGAGG -- hit    | Query:                   | hit:                     | PAM 3             | 1        | No           | Chr9:73158761-73158784 | -      | 73158767 | 40.7  |
| ATGCAAGGCAGCGACATCCGNGG -- query  | ATGCAAGGCAGCGACATCCGNGG  | ATGCAAGGCAGCGACATCCGAGGA |                   |          |              |                        |        |          |       |
| ATGCAAGGCAGCGACATCCGAGG -- hit    | Query:                   | hit:                     | Ins PAM 1         | 1        | No           | Chr9:73158761-73158784 | -      | 73158767 | 40.7  |
| ATGCAAGGCAGCGACATCCGNGNG -- query | ATGCAAGGCAGCGACATCCGNGNG | ATGCAAGGCAGCGACATCCGAGGA |                   |          |              |                        |        |          |       |
