# Supplementary material for: RNA-Sequencing-Based Transcriptomic Analysis Reveals a Role for Annexin-A1 in Classical and Influenza A Virus-Induced Autophagy
Source: Cells. 2020 Jun 4;9(6):1399. doi: 10.3390/cells9061399 (PMC7349256; doi:10.3390/cells9061399)
Supplement: Supplementary file 1 [file cells-09-01399-s001.zip]

Archive with 5 entries (4 files):
- cells-804836-revised supplementary/
- cells-804836-revised supplementary/cells-804836 -Table S1 off target.pdf
- cells-804836-revised supplementary/cells-804836 -Table S2 RNA Seq results.xlsx
- cells-804836-revised supplementary/cells-804836 -Table S3 GSEA.xlsx
- cells-804836-revised supplementary/cells-804836-supplementary figures.pdf
