# Supplementary material for: RNA-Sequencing-Based Transcriptomic Analysis Reveals a Role for Annexin-A1 in Classical and Influenza A Virus-Induced Autophagy
Source: Cells. 2020 Jun 4;9(6):1399. doi: 10.3390/cells9061399 (PMC7349256; doi:10.3390/cells9061399)
Supplement: Supplementary file 1 [file cells-09-01399-s001.zip › cells-804836-revised supplementary/cells-804836 -Table S2 RNA Seq results.xlsx]

## Sheet: a549_ctrl
Genename	Ensembl_ID	logFC	logCPM	PValue	FDR
IFIT3	ENSG00000119917	-2.37277	4.21889	2.07096e-24	4.62531e-23
RP11-6N17.9	ENSG00000263798	-2.24248	2.43391	1.89829e-12	1.89091e-11
RP11-510C10.2	ENSG00000224127	-2.17235	3.66177	1.30368e-23	2.71447e-22
DDX58	ENSG00000107201	-2.08945	4.50235	7.69632e-32	2.46496e-30
NAPA	ENSG00000105402	-2.08893	3.26696	1.60379e-16	2.23128e-15
SYT6	ENSG00000134207	-1.97606	3.2683	3.96606e-16	5.39571e-15
FBXO22	ENSG00000167196	-1.95056	2.95819	9.2286e-14	1.04192e-12
CTD-2396E7.10	ENSG00000268191	-1.86496	4.00216	3.99833e-21	7.51133e-20
AHNAK2	ENSG00000185567	-1.84709	3.38619	2.88912e-07	1.60828e-06
RCC1L	ENSG00000274523	-1.80394	6.78464	5.36659e-29	1.5046e-27
TTLL2	ENSG00000120440	-1.78724	2.22301	1.27798e-10	1.06199e-09
AKR1B10	ENSG00000198074	-1.75289	3.16959	1.11764e-07	6.60842e-07
RP1-63G5.8	ENSG00000272694	-1.75095	3.73149	1.4755e-15	1.92232e-14
AC072062.1	ENSG00000229267	-1.72413	3.94295	5.86007e-21	1.08107e-19
AC072062.3	ENSG00000227769	-1.70773	3.36741	4.41554e-15	5.56406e-14
NPBWR1	ENSG00000183729	-1.65972	3.07138	5.05983e-13	5.33769e-12
RINT1	ENSG00000135249	-1.65637	3.02211	2.07251e-11	1.85961e-10
RP11-229P13.22	ENSG00000229257	-1.65463	4.50316	1.41085e-22	2.78665e-21
ADCY8	ENSG00000155897	-1.65072	3.10534	1.2853e-13	1.43183e-12
THRIL	ENSG00000280634	-1.64387	7.6423	4.11597e-51	2.40289e-49
STAT1	ENSG00000115415	-1.63788	6.713	6.45035e-38	2.54265e-36
ACMSD	ENSG00000153086	-1.63613	4.67566	1.13588e-23	2.38121e-22
RP11-229P13.23	ENSG00000231864	-1.63129	4.34806	4.18013e-12	3.9956e-11
PLCG1	ENSG00000124181	-1.63081	6.01056	9.43837e-38	3.65796e-36
RP11-449J21.5	ENSG00000267128	-1.61236	6.20886	1.12159e-43	5.41651e-42
STAB1	ENSG00000010327	-1.60554	2.78287	5.5251e-07	2.92894e-06
RP11-355I22.2	ENSG00000258903	-1.57066	3.5631	5.61858e-14	6.49446e-13
RBM8A	ENSG00000265241	-1.56746	2.27602	9.07488e-09	6.17761e-08
LINC01529	ENSG00000225872	-1.56732	5.98258	4.09897e-26	1.00824e-24
MRS2	ENSG00000124532	-1.56589	1.88339	2.37576e-07	1.34689e-06
ALG1L8P	ENSG00000227620	-1.56431	4.59576	1.33113e-19	2.26121e-18
BLK	ENSG00000136573	-1.55684	2.2949	1.98612e-06	9.6269e-06
DNAH11	ENSG00000105877	-1.55456	6.77789	2.57364e-48	1.40469e-46
PLCE1-AS1	ENSG00000268894	-1.54441	4.86757	9.15093e-24	1.93154e-22
RPS24	ENSG00000138326	-1.53685	2.9951	8.9698e-06	3.95305e-05
AC091177.1	ENSG00000230113	-1.52379	2.11596	8.84813e-07	4.53669e-06
TP53I11	ENSG00000175274	-1.52001	6.32457	3.74519e-31	1.15925e-29
ITGA7	ENSG00000135424	-1.51521	3.91495	4.1365e-13	4.4059e-12
NR2F2-AS1	ENSG00000247809	-1.50991	2.67528	3.01015e-08	1.93219e-07
CTA-373H7.7	ENSG00000206028	-1.50384	3.6078	2.77411e-13	2.98581e-12
RP11-498C9.13	ENSG00000263585	-1.50046	6.68242	1.06089e-37	4.09442e-36
RP11-145A3.2	ENSG00000226349	-1.48505	1.83447	1.20121e-06	6.02172e-06
RP11-356K23.1	ENSG00000258752	-1.47989	1.94024	1.86815e-06	9.11255e-06
RP5-1142A6.10	ENSG00000278341	-1.47943	3.45947	7.13495e-12	6.70191e-11
SCTR	ENSG00000080293	-1.47538	2.0949	1.52231e-06	7.53721e-06
CGREF1	ENSG00000138028	-1.46323	4.04104	6.46993e-07	3.40049e-06
BCL7A	ENSG00000110987	-1.45688	2.8859	1.16211e-08	7.81293e-08
RP11-74H8.1	ENSG00000265664	-1.45249	4.98482	4.83193e-16	6.55437e-15
RP11-168K11.2	ENSG00000237073	-1.45057	5.20681	3.71698e-28	1.01137e-26
RP11-488C13.5	ENSG00000258301	-1.43912	4.57326	1.70236e-20	3.0729e-19
ALG1L7P	ENSG00000251271	-1.42787	3.64758	7.61818e-11	6.4765e-10
RP11-728F11.3	ENSG00000254844	-1.41837	2.49308	7.04547e-07	3.67576e-06
CYP2D6	ENSG00000100197	-1.41703	2.18669	8.31822e-07	4.28644e-06
ALG1L	ENSG00000189366	-1.41687	4.48655	8.19111e-18	1.23254e-16
RP11-394B2.1	ENSG00000279569	-1.41682	7.21262	3.99632e-25	9.33217e-24
RPS3	ENSG00000149273	-1.40385	2.48337	9.35055e-05	0.000340369
AHNAK	ENSG00000124942	-1.39957	2.82369	4.96834e-06	2.26871e-05
RP11-358M14.2	ENSG00000228322	-1.39708	1.92084	4.14636e-05	0.000162749
CTD-2510F5.4	ENSG00000265415	-1.39499	6.7488	1.84714e-30	5.49612e-29
PSCA	ENSG00000167653	-1.39286	3.09977	5.15396e-09	3.59608e-08
CTD-2562J17.7	ENSG00000254429	-1.39212	2.76593	1.06803e-06	5.40697e-06
CTD-2562J17.9	ENSG00000254963	-1.389	2.38054	5.71616e-05	0.000217577
IPPK	ENSG00000127080	-1.38324	4.83422	1.09114e-17	1.62859e-16
RPL19	ENSG00000108298	-1.38292	2.74436	0.00345098	0.00873302
AC108004.3	ENSG00000241525	-1.37818	4.44696	9.09737e-16	1.21439e-14
SYN2	ENSG00000157152	-1.37552	7.44509	2.41445e-43	1.14798e-41
MVK	ENSG00000110921	-1.37518	2.70279	9.49501e-08	5.66507e-07
CTB-79E8.2	ENSG00000253445	-1.3679	3.85647	2.399e-12	2.35659e-11
SMIM14	ENSG00000163683	-1.36258	3.73039	9.57165e-13	9.89786e-12
MAFG	ENSG00000197063	-1.35039	3.15768	2.88144e-08	1.85086e-07
RP11-127I20.7	ENSG00000266994	-1.34374	2.55439	1.1686e-05	5.0654e-05
STIP1	ENSG00000168439	-1.34061	2.33137	1.27917e-05	5.51617e-05
CTB-174D11.1	ENSG00000248222	-1.33941	2.25708	3.06024e-06	1.43872e-05
RP5-981O7.2	ENSG00000229591	-1.339	5.38261	1.53594e-17	2.2668e-16
FAM63A	ENSG00000143409	-1.3387	2.34546	1.05186e-05	4.58741e-05
RP3-508I15.14	ENSG00000225450	-1.33788	6.72996	3.03072e-19	4.96542e-18
MYDGF	ENSG00000074842	-1.33195	5.36875	1.93454e-21	3.67921e-20
RP13-131K19.6	ENSG00000272434	-1.32788	6.91855	5.17084e-16	6.98329e-15
AC012146.7	ENSG00000234327	-1.32462	1.97538	0.000106017	0.000382591
DOCK1	ENSG00000150760	-1.31967	5.86994	7.1725e-21	1.32054e-19
KSR1	ENSG00000141068	-1.31618	5.83114	1.75694e-22	3.46282e-21
RP11-83J21.3	ENSG00000236658	-1.30802	3.49285	1.14943e-10	9.58617e-10
CTC-564N23.2	ENSG00000250615	-1.3031	4.84721	1.42651e-15	1.86112e-14
SFPQ	ENSG00000116560	-1.30038	2.3112	0.00381495	0.00954929
THOC6	ENSG00000131652	-1.29999	1.67195	0.000393594	0.00126147
LA16c-444G7.1	ENSG00000261273	-1.29459	2.95437	1.05625e-06	5.35027e-06
DBN1	ENSG00000113758	-1.29294	1.5373	0.000266221	0.000886186
PNN	ENSG00000100941	-1.28534	2.17386	0.00322069	0.00822927
RP5-1113E3.3	ENSG00000203469	-1.28096	4.47264	3.52237e-15	4.46295e-14
KRTCAP3	ENSG00000157992	-1.27378	5.09671	1.24124e-15	1.63094e-14
WNT5A-AS1	ENSG00000244586	-1.2692	1.74751	3.96351e-05	0.000156037
ATP6V0E2-AS1	ENSG00000204934	-1.26748	7.11884	2.51534e-22	4.89483e-21
RP11-367J11.2	ENSG00000245748	-1.26647	7.28813	4.22518e-32	1.39688e-30
CHDH	ENSG00000016391	-1.26558	2.85994	0.00022525	0.000759117
MYLK-AS1	ENSG00000239523	-1.26458	8.09687	1.15376e-38	4.66769e-37
DHRS4	ENSG00000157326	-1.25489	2.85557	1.2222e-05	5.2853e-05
HDDC2	ENSG00000111906	-1.25449	7.5569	6.78773e-39	2.80763e-37
RP11-310I9.1	ENSG00000248601	-1.25316	3.5592	1.23009e-09	9.17986e-09
ELF3	ENSG00000163435	-1.25202	2.46483	1.42845e-05	6.09155e-05
RP11-77K12.4	ENSG00000203472	-1.24838	2.65147	2.57693e-07	1.44848e-06
RP3-508I15.19	ENSG00000230149	-1.23863	1.78634	5.8346e-05	0.000221657
ZBTB45P2	ENSG00000226065	-1.23436	2.01084	6.00289e-05	0.000227395
PLG	ENSG00000122194	-1.23376	2.27214	3.10007e-05	0.000123732
ARHGEF3-AS1	ENSG00000240198	-1.23182	2.20942	4.37611e-05	0.000171039
IL17D	ENSG00000172458	-1.23094	3.2213	6.27946e-08	3.83587e-07
ATPAF2	ENSG00000171953	-1.22859	4.81684	1.27424e-16	1.78355e-15
RP11-85G18.6	ENSG00000262412	-1.22487	2.46504	1.07391e-06	5.43077e-06
RIC1	ENSG00000107036	-1.22471	5.20723	7.65244e-14	8.70359e-13
SLC7A11-AS1	ENSG00000250033	-1.22186	11.3921	8.26309e-40	3.52865e-38
NIFKP6	ENSG00000268144	-1.21952	2.00882	1.36275e-05	5.84379e-05
MRPS7	ENSG00000125445	-1.21649	3.16519	6.64763e-08	4.03937e-07
TCEAL9	ENSG00000185222	-1.21372	1.53974	0.00176033	0.00483685
RP11-488C13.6	ENSG00000259081	-1.21333	5.66666	6.7946e-20	1.16928e-18
FBXL22	ENSG00000197361	-1.2119	2.02146	0.000181694	0.000625119
ZBTB45P1	ENSG00000225108	-1.20999	2.24188	1.55732e-05	6.6136e-05
GALK1	ENSG00000108479	-1.20929	7.75009	4.16606e-09	2.95371e-08
RP11-67L3.5	ENSG00000242396	-1.20674	3.22718	4.01996e-06	1.85772e-05
RP11-681H18.2	ENSG00000277801	-1.20181	4.07892	7.32114e-10	5.58101e-09
AP003419.11	ENSG00000256514	-1.19817	1.30412	0.0061736	0.0146577
TSEN54	ENSG00000182173	-1.19635	3.24544	2.72606e-06	1.29281e-05
RP11-455O6.2	ENSG00000262115	-1.19625	3.49038	6.88385e-08	4.16645e-07
C1orf35	ENSG00000143793	-1.19559	3.46332	4.98528e-09	3.49299e-08
RP11-875O11.1	ENSG00000245025	-1.19472	8.18107	4.75945e-21	8.84036e-20
GOLGA4	ENSG00000144674	-1.19411	1.81668	0.00236927	0.00629802
RCE1	ENSG00000173653	-1.19375	4.1847	9.09359e-12	8.43008e-11
RP11-403F21.4	ENSG00000283162	-1.19313	6.15239	4.74467e-16	6.44548e-15
PLD4	ENSG00000166428	-1.19175	7.64166	5.81588e-32	1.90233e-30
NALCN-AS1	ENSG00000233009	-1.19146	3.14904	9.52769e-08	5.68089e-07
TOP2A	ENSG00000131747	-1.18657	2.39635	0.0032963	0.00840383
ZNF710	ENSG00000140548	-1.1863	4.58969	3.14638e-15	4.00306e-14
DENND1C	ENSG00000205744	-1.18564	4.17358	3.04811e-08	1.95249e-07
PRPF8	ENSG00000174231	-1.18491	2.23215	2.04946e-05	8.46583e-05
PDZD11	ENSG00000120509	-1.18221	3.32916	4.94004e-08	3.07417e-07
AC005237.4	ENSG00000225521	-1.18084	3.17524	6.78321e-08	4.11093e-07
RP11-484K9.4	ENSG00000272844	-1.17957	2.82444	1.96738e-05	8.17071e-05
SNHG7	ENSG00000233016	-1.17889	5.40005	6.83656e-14	7.79486e-13
GAS6	ENSG00000183087	-1.17828	7.83869	3.43394e-24	7.52367e-23
RP11-463J10.3	ENSG00000259007	-1.17756	4.22101	1.33066e-08	8.88481e-08
FARP1-AS1	ENSG00000231194	-1.17742	3.06778	1.9151e-05	7.97872e-05
CTD-3193O13.11	ENSG00000268120	-1.17699	2.16149	0.000115676	0.000414368
RNASEH2B-AS1	ENSG00000233672	-1.17517	2.12223	0.000151418	0.000530655
ALG1L9P	ENSG00000248671	-1.1749	5.52676	2.43477e-19	4.04655e-18
GPR20	ENSG00000204882	-1.17154	3.89164	3.93499e-08	2.48776e-07
PCDH9-AS1	ENSG00000234527	-1.17051	3.66896	1.54504e-09	1.14286e-08
CYB561D2	ENSG00000114395	-1.16816	2.04981	0.000563434	0.00173933
MTBP	ENSG00000172167	-1.1672	3.21344	1.8849e-08	1.24188e-07
RBM3	ENSG00000102317	-1.16214	1.2417	0.00384767	0.00962858
CTD-2540B15.11	ENSG00000267580	-1.15555	3.73353	1.44142e-08	9.58591e-08
PRSS54	ENSG00000103023	-1.15296	4.75374	8.18344e-13	8.49089e-12
MYBBP1A	ENSG00000132382	-1.14907	2.45023	3.90213e-06	1.80508e-05
IQCA1	ENSG00000132321	-1.14712	3.1061	0.000255789	0.000854544
PMCH	ENSG00000183395	-1.1425	5.73711	1.56346e-21	2.97962e-20
RPL23	ENSG00000125691	-1.14187	1.419	0.0175006	0.0366293
RP4-669P10.16	ENSG00000232710	-1.14122	1.63932	0.00248849	0.00657177
DEPDC1-AS1	ENSG00000234264	-1.13938	3.84051	1.85712e-09	1.36495e-08
AC008937.3	ENSG00000225230	-1.13932	2.4465	2.33914e-05	9.55545e-05
TUBA1B	ENSG00000123416	-1.1392	1.99316	0.000134056	0.000474677
SH3BP5-AS1	ENSG00000224660	-1.13769	6.66582	6.41467e-27	1.64358e-25
ADPRHL1	ENSG00000153531	-1.13699	2.23305	0.000166581	0.00057678
KRT7	ENSG00000135480	-1.13438	3.81694	3.95536e-05	0.000155782
RP11-59N23.1	ENSG00000255644	-1.13331	2.18192	4.88384e-05	0.000188725
DDX21	ENSG00000165732	-1.13038	1.83786	0.00285301	0.00742347
RP13-1032I1.10	ENSG00000262660	-1.13026	1.69449	0.000551257	0.00170852
ACBD6	ENSG00000230124	-1.12826	4.33282	9.06269e-11	7.64815e-10
RP11-6N17.6	ENSG00000264019	-1.12735	8.10328	8.18521e-31	2.50001e-29
CTA-363E6.6	ENSG00000260592	-1.12711	3.76373	1.83543e-10	1.49032e-09
YWHAE	ENSG00000108953	-1.12524	1.43478	0.00173571	0.00477915
HSPA4	ENSG00000170606	-1.12351	1.89163	0.00186381	0.00509235
RP11-49I4.3	ENSG00000249474	-1.1207	5.75854	1.41962e-19	2.40709e-18
TCEAL4	ENSG00000133142	-1.11814	2.57381	0.000525915	0.00163887
EPHA5-AS1	ENSG00000250846	-1.1172	3.22849	1.58649e-06	7.82974e-06
GPN3	ENSG00000111231	-1.11693	3.23363	2.52165e-07	1.41914e-06
ILF3	ENSG00000129351	-1.11599	2.07958	0.00545083	0.0131641
TPM2	ENSG00000198467	-1.11401	2.62172	0.000430056	0.00136787
DCUN1D2	ENSG00000150401	-1.11059	2.42365	3.67117e-05	0.000145023
GRTP1-AS1	ENSG00000225083	-1.11039	2.3008	3.06553e-05	0.000122621
RP11-524F11.2	ENSG00000264666	-1.11034	3.8704	6.08364e-07	3.20294e-06
VPS4A	ENSG00000132612	-1.10434	7.52523	1.32027e-33	4.57825e-32
CLNS1A	ENSG00000074201	-1.10366	4.33098	1.3522e-09	1.00343e-08
CTD-2319I12.2	ENSG00000267416	-1.10318	3.51687	2.71978e-07	1.52414e-06
STK24	ENSG00000102572	-1.10034	5.7024	4.71041e-18	7.19352e-17
XRCC6	ENSG00000196419	-1.09687	1.32674	0.0020868	0.00562169
FLG	ENSG00000143631	-1.09381	5.21799	3.95732e-13	4.22481e-12
RP11-545P7.4	ENSG00000257286	-1.09299	6.17771	1.42242e-12	1.43864e-11
PTPRH	ENSG00000080031	-1.0886	2.04619	0.0010684	0.00310489
CTB-49A3.2	ENSG00000248245	-1.08773	4.76504	5.0705e-09	3.5432e-08
RP11-285E9.6	ENSG00000263718	-1.08698	4.09062	1.44071e-06	7.14854e-06
AC009133.15	ENSG00000259952	-1.08625	5.25798	6.38441e-06	2.86151e-05
PPIE	ENSG00000084072	-1.08598	5.57231	1.94836e-19	3.26165e-18
POLE3	ENSG00000148229	-1.08577	2.23297	0.000955804	0.00280151
RP11-7M8.2	ENSG00000256811	-1.08528	2.34938	0.000224608	0.000757334
ZSCAN16	ENSG00000196812	-1.0842	1.40673	0.00242504	0.00642743
CTD-2196E14.5	ENSG00000261266	-1.0812	7.30594	2.25699e-15	2.89548e-14
RP11-532E4.2	ENSG00000255177	-1.07996	8.08597	6.41467e-08	3.90812e-07
ANXA2P2	ENSG00000231991	-1.07881	2.22663	0.00141682	0.00399167
RPS25	ENSG00000118181	-1.0763	3.5263	0.000853995	0.00253125
BSG	ENSG00000172270	-1.07503	3.42662	4.06898e-07	2.21299e-06
RP11-74C13.4	ENSG00000261065	-1.07436	3.28022	5.92205e-06	2.67115e-05
RP11-17A1.3	ENSG00000246225	-1.07167	4.09541	5.25819e-08	3.2486e-07
SSBP4	ENSG00000130511	-1.07123	1.38954	0.00122318	0.0035036
CTD-2576F9.2	ENSG00000270017	-1.0691	3.37609	2.32135e-06	1.11289e-05
LTBR	ENSG00000111321	-1.06792	4.06665	3.84152e-10	3.03375e-09
RNF11	ENSG00000123091	-1.06764	3.03769	0.000108155	0.000389239
ALG1	ENSG00000033011	-1.06638	5.77091	3.52313e-11	3.08032e-10
RP11-65B7.2	ENSG00000281883	-1.06603	1.47109	0.00617049	0.0146541
RP11-703I16.1	ENSG00000267480	-1.06344	2.31441	0.0003594	0.00116238
CTC-458I2.2	ENSG00000251675	-1.06152	7.49249	2.77493e-24	6.09427e-23
AC114271.2	ENSG00000274425	-1.06035	4.33663	1.0726e-06	5.42712e-06
RP11-419I17.1	ENSG00000283674	-1.05997	4.8879	6.94282e-13	7.21178e-12
RP11-701H24.3	ENSG00000257647	-1.05968	4.41279	1.00193e-09	7.55239e-09
SARNP	ENSG00000205323	-1.05656	4.75757	2.1033e-10	1.69885e-09
AP003419.16	ENSG00000255949	-1.05497	7.13958	1.80065e-15	2.32948e-14
TEX9	ENSG00000151575	-1.05284	5.7554	1.25459e-16	1.75871e-15
RP11-802E16.3	ENSG00000255031	-1.05268	5.0659	1.32441e-12	1.34514e-11
VPS9D1	ENSG00000075399	-1.05243	7.10153	9.43109e-28	2.49978e-26
RP11-54O7.3	ENSG00000223764	-1.05069	4.37472	1.80806e-07	1.043e-06
RP11-332H18.5	ENSG00000267131	-1.04884	5.85644	3.00557e-14	3.56342e-13
CTD-3239E11.2	ENSG00000253197	-1.04701	6.67286	3.43012e-22	6.66094e-21
C1QBPP2	ENSG00000213409	-1.04601	1.40574	0.00576645	0.0138286
RP11-524F11.1	ENSG00000265511	-1.04561	2.76958	1.75811e-05	7.37463e-05
PRRT3	ENSG00000163704	-1.04551	4.44497	1.84655e-11	1.66496e-10
RP11-75I2.3	ENSG00000279333	-1.04509	6.14712	1.37713e-16	1.91883e-15
ECE2	ENSG00000145194	-1.04461	2.41489	0.000152619	0.000534456
RP11-26J3.1	ENSG00000249328	-1.03975	1.51691	0.00107993	0.00313445
CTD-2154I11.2	ENSG00000250240	-1.03841	3.77915	1.57124e-08	1.03968e-07
AC005540.3	ENSG00000235852	-1.03768	4.9125	9.05486e-08	5.41296e-07
MAFK	ENSG00000198517	-1.03755	4.35468	6.32173e-08	3.85914e-07
LTA4H	ENSG00000111144	-1.03615	1.15836	0.00404421	0.0100604
RP1-102D24.5	ENSG00000232363	-1.03599	2.90203	7.72909e-05	0.000285973
LPO	ENSG00000167419	-1.03446	3.86759	1.12237e-07	6.6321e-07
PCDH9-AS2	ENSG00000228842	-1.03142	2.94379	0.000598761	0.00183854
RPL8	ENSG00000161016	-1.02982	2.02842	0.00160748	0.00446971
STEAP3-AS1	ENSG00000229867	-1.02977	6.27018	2.32461e-14	2.7847e-13
GALC	ENSG00000054983	-1.02793	2.56296	2.58681e-05	0.000105067
EEF1A1P5	ENSG00000196205	-1.02444	2.67879	0.0162022	0.0342773
RP11-311F12.2	ENSG00000264785	-1.02375	8.73451	2.04923e-08	1.34534e-07
C2orf16	ENSG00000221843	-1.0235	4.02594	9.06292e-10	6.85778e-09
RP11-128P10.1	ENSG00000257579	-1.02323	6.32477	3.3127e-13	3.55307e-12
RECQL4	ENSG00000160957	-1.02228	4.34911	4.56784e-07	2.45674e-06
CHD3	ENSG00000170004	-1.02164	2.5048	0.000894778	0.00263941
RP11-33N14.3	ENSG00000277873	-1.02083	5.05575	5.23457e-11	4.52518e-10
PIAS2	ENSG00000078043	-1.01914	2.48025	0.000260822	0.000870099
ENPP7P10	ENSG00000249767	-1.01882	3.04253	1.37337e-05	5.87839e-05
EPB41L4A-AS1	ENSG00000224032	-1.01549	4.92345	6.1843e-14	7.08621e-13
PSMA8	ENSG00000154611	-1.01477	6.96086	3.42422e-21	6.44592e-20
ZC3H14	ENSG00000100722	-1.01288	4.12982	1.00457e-08	6.78345e-08
PRR19	ENSG00000188368	-1.01266	4.62776	2.44877e-07	1.38319e-06
AP000688.11	ENSG00000236677	-1.01263	1.89531	0.000770078	0.00230548
ICAM3	ENSG00000076662	-1.01201	3.05101	0.000209163	0.00070957
TLN1	ENSG00000137076	-1.01138	2.41856	0.000672759	0.00204129
TEX22	ENSG00000226174	-1.01013	4.99252	4.93858e-12	4.7108e-11
RP11-80H5.6	ENSG00000225836	-1.00882	1.75852	0.00297044	0.00768348
PLXDC1	ENSG00000161381	-1.00692	3.64736	2.26056e-06	1.08714e-05
BTBD11	ENSG00000151136	-1.00681	3.7324	3.4264e-07	1.88575e-06
DEGS2	ENSG00000168350	-1.00385	2.9724	0.000327527	0.00106866
FTO	ENSG00000140718	-1.00324	3.4782	4.82636e-07	2.58227e-06
RSPH14	ENSG00000100218	-1.00181	6.18599	1.76436e-14	2.12739e-13
AC016995.3	ENSG00000231367	-1.00173	10.8792	2.2621e-20	4.04372e-19
ELP4	ENSG00000109911	-1.00028	1.59825	0.00457341	0.0112374
FAM149A	ENSG00000109794	1.00178	2.26939	0.000467217	0.00147539
RBMS1	ENSG00000153250	1.00264	2.36679	0.000530733	0.00165165
AC068491.2	ENSG00000229118	1.00295	2.36736	0.000884936	0.00261456
YEATS2-AS1	ENSG00000233885	1.00397	6.702	2.47162e-22	4.85068e-21
CMC1	ENSG00000187118	1.00421	7.32073	2.67264e-28	7.29361e-27
RP11-567L7.5	ENSG00000266002	1.00437	3.68272	1.76956e-08	1.16839e-07
DHX29	ENSG00000067248	1.00446	1.99162	0.000572271	0.00176248
RP1-149A16.17	ENSG00000241954	1.00483	2.05982	0.00217025	0.00581592
SLC22A2	ENSG00000112499	1.00554	2.86329	0.000318312	0.00104234
RP11-27K13.3	ENSG00000236137	1.00562	3.12999	1.93769e-05	8.05825e-05
CBFA2T2	ENSG00000078699	1.0057	2.87268	3.44029e-05	0.000136605
SLC24A1	ENSG00000074621	1.00589	5.29811	1.6073e-12	1.61853e-11
VWA5B2	ENSG00000145198	1.00592	1.5189	0.00351323	0.00886865
MYH7B	ENSG00000078814	1.00647	4.71279	2.53755e-13	2.74079e-12
DAAM1	ENSG00000100592	1.00814	6.56275	6.75358e-15	8.35054e-14
TMEM115	ENSG00000126062	1.0083	2.32214	0.000338335	0.00110004
RUNX3	ENSG00000020633	1.00832	2.59471	0.000518088	0.00161611
GNG3	ENSG00000162188	1.0099	4.73995	2.82178e-13	3.03357e-12
AC010132.11	ENSG00000234983	1.01058	4.06277	6.51557e-08	3.96436e-07
AGO2	ENSG00000123908	1.01396	2.56755	5.78998e-05	0.000220053
TMED5	ENSG00000117500	1.01412	2.1513	0.000531879	0.00165465
RGL2	ENSG00000237441	1.01421	2.36646	0.000214424	0.000725016
IL4	ENSG00000113520	1.01591	1.63709	0.00242562	0.00642743
POU2F2	ENSG00000028277	1.01593	2.07054	0.000137754	0.000487211
EBNA1BP2	ENSG00000117395	1.0163	4.396	1.38414e-06	6.88633e-06
IFNA1	ENSG00000197919	1.01634	4.60024	1.0327e-09	7.77604e-09
PHKA1	ENSG00000067177	1.01673	2.01243	0.00307586	0.00790519
THRA	ENSG00000126351	1.0169	4.11779	1.88977e-09	1.38563e-08
RP11-102L12.2	ENSG00000259326	1.01703	1.84066	0.000569808	0.00175607
MSC-AS1	ENSG00000235531	1.01704	8.08107	4.07745e-28	1.10619e-26
BCAS1	ENSG00000064787	1.01767	1.24133	0.0059036	0.0140929
PSMC5	ENSG00000087191	1.01822	3.28627	4.19478e-07	2.27604e-06
DDX41	ENSG00000183258	1.01874	1.80355	0.00175026	0.00481491
ARG1	ENSG00000118520	1.01977	1.52569	0.00357214	0.00899766
ABCB8	ENSG00000197150	1.02104	2.25102	3.22011e-05	0.000128248
NUP50	ENSG00000093000	1.02221	3.65773	2.3869e-07	1.35213e-06
SELO	ENSG00000073169	1.02261	5.76147	6.95224e-15	8.56175e-14
RP11-253I19.3	ENSG00000255670	1.02268	5.82267	3.62302e-18	5.58843e-17
AFF4	ENSG00000072364	1.02379	3.31819	1.63265e-06	8.03179e-06
LGALS8-AS1	ENSG00000223776	1.02414	4.55972	7.89968e-12	7.38264e-11
NPSR1	ENSG00000187258	1.02517	3.83389	4.48685e-08	2.80588e-07
CTHRC1	ENSG00000164932	1.02702	2.92398	3.20524e-06	1.50306e-05
ATE1-AS1	ENSG00000226864	1.02731	2.51541	6.77972e-05	0.000254005
NIPAL1	ENSG00000163293	1.02781	2.80746	0.000376863	0.0012129
FUT11	ENSG00000196968	1.02869	1.96434	0.000498056	0.00155943
CHKA	ENSG00000110721	1.02892	7.6873	6.74384e-26	1.64564e-24
MARCH4	ENSG00000144583	1.02944	1.88997	0.000615534	0.00188502
ZC3HAV1	ENSG00000105939	1.02994	1.15582	0.00739632	0.0172413
GGPS1	ENSG00000152904	1.03102	3.68733	7.55514e-07	3.92833e-06
ADAR	ENSG00000160710	1.03143	1.72306	0.0015423	0.00430704
ANXA4	ENSG00000196975	1.03175	2.65395	5.71775e-05	0.000217577
LGALS2	ENSG00000100079	1.03225	2.57084	2.23614e-05	9.1672e-05
MICD	ENSG00000229390	1.03285	5.2651	5.96585e-15	7.40632e-14
HIPK2	ENSG00000064393	1.0337	1.32099	0.00206429	0.00557081
RP11-146E13.4	ENSG00000277128	1.03406	5.77694	1.75579e-15	2.27464e-14
RP11-51M24.1	ENSG00000249875	1.0353	2.24227	9.27182e-05	0.000337901
RP11-624C23.1	ENSG00000253535	1.03536	3.18752	1.04597e-06	5.30404e-06
PPWD1	ENSG00000113593	1.03558	3.86338	1.07753e-06	5.44608e-06
RP11-582E3.2	ENSG00000256226	1.03881	3.08212	1.00069e-05	4.38082e-05
PARD6G	ENSG00000178184	1.03899	4.99123	1.41942e-13	1.57366e-12
ELMOD3	ENSG00000115459	1.03918	5.79868	8.53019e-14	9.66716e-13
VPS51	ENSG00000149823	1.03933	1.5066	0.00179044	0.0049108
FAM166B	ENSG00000215187	1.03977	1.5771	0.00552316	0.0133156
RP11-542C16.1	ENSG00000263171	1.04014	7.48666	2.66611e-20	4.73062e-19
AC079790.2	ENSG00000225214	1.04025	1.16677	0.0125787	0.0273581
DEFB107B	ENSG00000198129	1.04062	2.23974	9.33462e-05	0.000339923
CCDC80	ENSG00000091986	1.04106	3.38272	5.74833e-06	2.59787e-05
TADA1	ENSG00000152382	1.04148	4.25786	2.26339e-07	1.28873e-06
PDE7B	ENSG00000171408	1.04165	5.30608	6.24861e-11	5.34668e-10
RP11-56B16.2	ENSG00000259556	1.04185	4.56325	3.17317e-12	3.07128e-11
RNF145	ENSG00000145860	1.04227	2.42292	0.00130096	0.00369801
STK3	ENSG00000104375	1.04277	1.5481	0.00400809	0.00998396
AL109761.5	ENSG00000244676	1.04315	4.15906	1.00218e-09	7.55239e-09
COL4A3BP	ENSG00000113163	1.04459	2.27062	0.000730802	0.00220291
HDAC9	ENSG00000048052	1.04647	4.03801	1.89651e-08	1.24864e-07
RP11-498M5.2	ENSG00000251309	1.04709	4.14419	9.01605e-11	7.61575e-10
RP11-388C12.5	ENSG00000263321	1.04758	5.15692	4.1308e-11	3.60137e-10
DSP	ENSG00000096696	1.0499	1.94203	0.000260943	0.000870188
ATG2B	ENSG00000066739	1.05054	2.65884	1.22923e-05	5.31072e-05					ATG2B	ENSG00000066739	1.05054
ABHD17C	ENSG00000136379	1.05059	2.03318	0.000275976	0.000914897
Y_RNA	ENSG00000201820	1.05109	2.04541	0.000282982	0.000934896
ATP6AP1	ENSG00000071553	1.05337	1.41782	0.00106304	0.00309322
FOXA1	ENSG00000129514	1.05362	3.03551	2.94409e-06	1.39049e-05
FUNDC2	ENSG00000165775	1.05449	1.23173	0.00234858	0.00624842
MATN2	ENSG00000132561	1.05454	2.25428	4.61615e-05	0.000179433
DOT1L	ENSG00000104885	1.05483	4.06086	4.43047e-09	3.12915e-08
TMEM186	ENSG00000184857	1.05793	4.30798	1.48274e-08	9.84649e-08
ERCC6L	ENSG00000186871	1.05826	4.26833	9.11346e-11	7.67294e-10
LIFR-AS1	ENSG00000244968	1.05835	1.48529	0.00175223	0.00481889
THCAT158	ENSG00000263293	1.05876	8.30259	2.33675e-33	8.01272e-32
SH2D4A	ENSG00000104611	1.05946	4.02219	1.27778e-07	7.49283e-07
NPAS2	ENSG00000170485	1.06084	2.2316	0.000486494	0.00152893
RP11-736K20.5	ENSG00000255471	1.06095	2.46039	0.000162875	0.000565222
ATP2B1	ENSG00000070961	1.06103	2.30193	5.50221e-05	0.000210329
AP000432.1	ENSG00000280594	1.06132	2.44908	7.75898e-05	0.000286964
FAM216A	ENSG00000204856	1.06513	3.6793	6.37898e-08	3.88894e-07
EPS8L1	ENSG00000131037	1.06894	4.50455	7.68307e-10	5.84725e-09
TUB	ENSG00000166402	1.06947	5.83819	1.49244e-18	2.34518e-17
POR	ENSG00000127948	1.06966	3.69371	1.21222e-07	7.12652e-07
GGTA1P	ENSG00000204136	1.07141	1.26746	0.00211826	0.00569646
EP300-AS1	ENSG00000231993	1.07235	1.39847	0.00115472	0.0033264
WDFY2	ENSG00000139668	1.07254	1.54791	0.00112495	0.00325118
SUV39H2	ENSG00000152455	1.07441	5.81539	2.86985e-16	3.93336e-15
CALM2P2	ENSG00000229097	1.07451	3.97175	7.27752e-10	5.55235e-09
BRSK2	ENSG00000174672	1.0748	2.62759	0.000167294	0.000579032
SLC45A4	ENSG00000022567	1.07542	2.44624	0.000588292	0.00180941
RP11-4B16.4	ENSG00000278330	1.07584	2.64851	1.76394e-05	7.39571e-05
HCG17	ENSG00000270604	1.07586	4.99477	4.78545e-15	6.01376e-14
CHKB	ENSG00000100288	1.07626	5.96571	9.49845e-23	1.90051e-21
ZNF821	ENSG00000102984	1.07686	2.44149	1.02318e-05	4.4729e-05
CTC-359M8.1	ENSG00000250025	1.07757	1.81976	0.000196573	0.000671799
RBM23	ENSG00000100461	1.07795	1.31669	0.00387895	0.00968844
GPM6B	ENSG00000046653	1.07857	6.01692	2.06842e-13	2.25255e-12
RP11-274B21.12	ENSG00000229413	1.07869	3.0642	7.43417e-08	4.48481e-07
NDRG4	ENSG00000103034	1.07904	3.63851	2.81038e-07	1.57014e-06
SETDB1	ENSG00000143379	1.08092	4.79181	5.01924e-09	3.51271e-08
SCYL1	ENSG00000142186	1.08169	2.43426	1.09353e-05	4.76464e-05
HUS1	ENSG00000136273	1.08187	3.2668	5.44362e-08	3.35866e-07
MSI2	ENSG00000153944	1.08199	2.00118	0.000164613	0.000571039
RP11-95P13.1	ENSG00000230024	1.08207	3.04217	1.49308e-05	6.35541e-05
AC004906.3	ENSG00000237286	1.08385	1.81227	0.000964178	0.00282426
RP11-252A24.5	ENSG00000261170	1.0842	2.34128	9.55856e-05	0.000346845
RP4-789D17.5	ENSG00000271914	1.0843	1.2107	0.00122227	0.00350239
ARID5A	ENSG00000196843	1.08445	2.35755	3.01173e-05	0.000120574
MTMR7	ENSG00000003987	1.08511	5.84921	2.61968e-16	3.60656e-15
OSCAR	ENSG00000170909	1.08723	3.14904	1.67234e-06	8.20952e-06
SLC39A5	ENSG00000139540	1.08746	1.86832	0.000244832	0.000821196
FAM208B	ENSG00000108021	1.08785	3.86441	2.50129e-07	1.40914e-06
FAM47E	ENSG00000189157	1.08823	3.41549	2.96432e-06	1.3979e-05
AC007461.2	ENSG00000226101	1.08836	2.05037	0.000188817	0.000647211
EDRF1	ENSG00000107938	1.09009	1.57766	0.00140611	0.00396514
GS1-114I9.1	ENSG00000272638	1.09232	5.17107	1.10718e-13	1.24091e-12
ADGRV1	ENSG00000164199	1.09281	3.08282	1.5318e-06	7.5801e-06
SCAPER	ENSG00000140386	1.09469	1.72304	0.00195941	0.00531109
NEURL1	ENSG00000107954	1.09503	1.75736	0.00201432	0.00544869
PRELID1	ENSG00000169230	1.09541	2.59517	4.43804e-06	2.0407e-05
NPNT	ENSG00000168743	1.09629	1.59802	0.00781075	0.0180749
UNC5C	ENSG00000182168	1.09778	5.50155	3.4684e-17	4.97551e-16
RP11-412H8.2	ENSG00000258175	1.09818	5.28503	7.59597e-12	7.11322e-11
LSM4	ENSG00000130520	1.09851	3.40537	7.16887e-05	0.00026739
AC002310.13	ENSG00000260869	1.0992	3.46309	2.71466e-06	1.28807e-05
CTSH	ENSG00000103811	1.09922	3.93189	1.34902e-10	1.113e-09
PDE3A	ENSG00000172572	1.09926	3.1756	3.21468e-07	1.77984e-06
SMAD3	ENSG00000166949	1.0995	3.29804	4.01786e-07	2.18776e-06
GBF1	ENSG00000107862	1.0998	2.0166	0.000816522	0.00243033
AL356585.1	ENSG00000279081	1.10023	1.3903	0.00112751	0.00325718
GIT1	ENSG00000108262	1.10087	3.49942	1.19162e-07	7.01438e-07
MTHFD2	ENSG00000065911	1.10177	3.33631	7.37096e-09	5.04001e-08
SLC31A1	ENSG00000136868	1.10245	2.44411	7.35121e-05	0.000273528
RP11-656E20.5	ENSG00000255958	1.10469	3.44072	4.28315e-07	2.31581e-06
SMTN	ENSG00000183963	1.10652	2.69911	1.01915e-05	4.45949e-05
ECT2L	ENSG00000203734	1.10747	2.94383	3.31854e-07	1.83185e-06
ADD1	ENSG00000087274	1.10824	1.93789	0.000254368	0.000850106
RP11-1099M24.6	ENSG00000280046	1.11018	2.13774	1.723e-05	7.25045e-05
SUSD1	ENSG00000106868	1.11027	1.61574	0.000284267	0.000938802
PLXNB3	ENSG00000198753	1.11096	1.45432	0.000810589	0.00241579
TCF4-AS1	ENSG00000267028	1.11154	3.00839	4.06963e-05	0.000160078
AP001258.4	ENSG00000245571	1.11184	2.18533	1.59792e-05	6.7611e-05
CCDC13-AS1	ENSG00000173811	1.11264	2.19583	3.5339e-05	0.00014002
PPP2R2A	ENSG00000221914	1.11314	1.43143	0.00274591	0.00717515
ELK3	ENSG00000111145	1.11414	5.07366	3.35995e-16	4.58464e-15
CACNA2D2	ENSG00000007402	1.11535	2.71029	0.000190526	0.0006521
ITGA11	ENSG00000137809	1.11613	2.66676	0.000565331	0.0017446
PSTPIP1	ENSG00000140368	1.11657	1.61831	0.00185478	0.00507068
RP11-46A10.5	ENSG00000243155	1.11681	4.37815	1.5232e-11	1.38697e-10
ARV1	ENSG00000173409	1.1174	4.65143	9.69249e-14	1.08763e-12
STK11	ENSG00000118046	1.11995	1.55699	0.00231442	0.00616821
CPM	ENSG00000135678	1.12033	8.26253	4.79222e-24	1.03764e-22
NOX1	ENSG00000007952	1.12098	2.40807	2.23114e-05	9.15075e-05
RP11-304M2.3	ENSG00000255229	1.12185	2.70678	0.000159509	0.000555346
RBMS2	ENSG00000076067	1.12252	4.57877	1.65786e-12	1.6643e-11
RERE	ENSG00000142599	1.12263	2.52815	2.52182e-06	1.20462e-05
WEE2	ENSG00000214102	1.12499	1.70659	0.00102084	0.00297793
RGS20	ENSG00000147509	1.12511	4.45762	1.19724e-08	8.04323e-08
SLC31A2	ENSG00000136867	1.12608	4.5383	2.85244e-10	2.28592e-09
RP1-80N2.4	ENSG00000279368	1.12646	2.47117	6.60126e-05	0.000248328
NOD1	ENSG00000106100	1.12683	4.96092	3.60389e-12	3.46997e-11
SLCO1B3	ENSG00000111700	1.12993	3.70715	1.72506e-05	7.25577e-05
RP11-344N10.2	ENSG00000237768	1.13103	7.42839	9.25598e-31	2.81773e-29
LCAT	ENSG00000213398	1.13427	2.62755	3.35363e-06	1.56865e-05
RP11-274H2.2	ENSG00000243415	1.13516	13.0958	1.83338e-48	1.00662e-46
RP11-243J16.7	ENSG00000236559	1.14056	3.95766	8.79422e-07	4.51407e-06
CD101	ENSG00000134256	1.14193	2.62999	1.11448e-05	4.83992e-05
RP11-459E5.1	ENSG00000253125	1.14206	1.71008	0.000495401	0.00155322
PRKCH	ENSG00000027075	1.1427	4.43973	2.00788e-10	1.62462e-09
LONP1	ENSG00000196365	1.14288	2.78861	4.95422e-06	2.26339e-05
CDK19	ENSG00000155111	1.14301	2.05245	5.56105e-05	0.000212402
DPYD-AS1	ENSG00000232878	1.14307	4.27415	2.70773e-12	2.64858e-11
CEPT1	ENSG00000134255	1.14309	3.38579	2.58499e-07	1.45213e-06
BORA	ENSG00000136122	1.14397	5.10285	5.49677e-14	6.36963e-13
RNF146	ENSG00000118518	1.14404	1.5553	0.000500845	0.0015671
PARP16	ENSG00000138617	1.14406	2.57038	1.70279e-05	7.17521e-05
RP11-251G23.2	ENSG00000223886	1.14424	1.50129	0.000187583	0.000643462
TMCO6	ENSG00000113119	1.14544	2.71133	2.57369e-06	1.22686e-05
HIRIP3	ENSG00000149929	1.14623	6.3752	8.26356e-19	1.33257e-17
RP11-385F5.4	ENSG00000230325	1.1469	8.05626	6.20866e-35	2.28162e-33
RP11-504P24.5	ENSG00000229930	1.14706	3.41442	1.41546e-05	6.04259e-05
TNN	ENSG00000120332	1.14725	2.69821	0.000251651	0.000842246
RP11-977G19.5	ENSG00000258199	1.14906	2.70071	6.31967e-05	0.000238416
TTC7A	ENSG00000068724	1.14914	4.62387	4.14425e-15	5.22935e-14
UFSP2	ENSG00000109775	1.15057	3.38254	6.91332e-09	4.74468e-08
PIK3CB	ENSG00000051382	1.15075	1.80771	0.000271379	0.000901406
LINC01481	ENSG00000257815	1.15143	2.82077	5.85699e-06	2.64568e-05
RP4-728D4.2	ENSG00000239636	1.15156	2.2119	0.000276036	0.000914897
CDKN3	ENSG00000100526	1.15167	2.23177	0.000125136	0.000445315
GALNT7	ENSG00000109586	1.15233	3.83041	1.52228e-08	1.01018e-07
PPME1	ENSG00000214517	1.15334	6.85447	2.24246e-20	4.01639e-19
TMEM92	ENSG00000167105	1.15406	4.09708	8.46069e-10	6.41261e-09
ENDOU	ENSG00000111405	1.15417	2.06716	9.3735e-05	0.00034107
PSMG3-AS1	ENSG00000230487	1.1544	2.07027	0.00174936	0.00481386
TRIM56	ENSG00000169871	1.15587	1.50636	0.000203521	0.000693156
ATP5G1P4	ENSG00000227440	1.15728	3.66438	3.17071e-07	1.75656e-06
PNPT1	ENSG00000138035	1.15779	2.31256	1.94146e-05	8.07032e-05
CFAP36	ENSG00000163001	1.15801	5.31718	6.60719e-15	8.19149e-14
LTBP2	ENSG00000119681	1.15832	3.38463	5.37013e-08	3.31553e-07
CTC-308K20.1	ENSG00000204758	1.15838	4.3475	5.10879e-11	4.42474e-10
CCNB2	ENSG00000157456	1.15885	4.9756	1.70914e-11	1.54712e-10
RP1-197B17.7	ENSG00000280054	1.15992	1.93593	2.16033e-05	8.89592e-05
NUP155	ENSG00000113569	1.16007	1.72068	0.00010712	0.000386117
ORMDL1	ENSG00000128699	1.16099	1.82009	0.00015207	0.000532736
CNOT3	ENSG00000088038	1.16112	3.93202	2.85058e-08	1.83232e-07
RP11-863P13.4	ENSG00000205037	1.16297	1.57613	0.00044384	0.00140638
TLCD1	ENSG00000160606	1.16298	2.27564	0.00125765	0.00358928
CTB-60B18.10	ENSG00000268655	1.1633	3.63771	2.55915e-09	1.84997e-08
ICMT	ENSG00000116237	1.16492	5.17058	1.68572e-18	2.63543e-17
OPA3	ENSG00000125741	1.1659	5.95438	1.31442e-19	2.23694e-18
RORA-AS1	ENSG00000245534	1.16661	2.14501	0.00012821	0.000455199
SH3BP5	ENSG00000131370	1.16663	6.88149	6.11231e-25	1.4095e-23
LINC01588	ENSG00000214900	1.16713	3.57082	3.35716e-10	2.66722e-09
PRKD1	ENSG00000184304	1.16734	1.4846	0.000737294	0.00221741
CCDC106	ENSG00000173581	1.16742	2.95746	1.32753e-06	6.62046e-06
COL6A6	ENSG00000206384	1.16866	3.15773	2.92033e-06	1.38068e-05
SMLR1	ENSG00000256162	1.16885	2.25619	0.000819321	0.00243709
USP35	ENSG00000118369	1.16914	1.67082	0.000195254	0.000667539
IFIT1	ENSG00000185745	1.17294	3.52371	9.51705e-07	4.86345e-06
TRAF2	ENSG00000127191	1.1743	3.1722	9.66727e-09	6.54706e-08
NRSN1	ENSG00000152954	1.17507	2.19606	1.41566e-05	6.04259e-05
IL17B	ENSG00000127743	1.17588	1.19084	0.00146483	0.00410563
NUDT5	ENSG00000165609	1.17647	4.30171	3.29221e-11	2.89489e-10
RAD21	ENSG00000164754	1.17676	1.96527	0.000398765	0.00127539
GRIN3A	ENSG00000198785	1.17867	3.93311	1.55361e-10	1.27269e-09
RP11-73E17.2	ENSG00000258738	1.17877	4.28907	4.08341e-10	3.21377e-09
SERINC4	ENSG00000184716	1.18067	4.40645	1.77583e-10	1.44574e-09
CTC-459F4.5	ENSG00000266977	1.18092	3.06061	1.35195e-07	7.9127e-07
TMPRSS11D	ENSG00000153802	1.18143	1.76614	2.32757e-05	9.51241e-05
ADORA2A-AS1	ENSG00000178803	1.1815	3.86441	2.41545e-11	2.15059e-10
ACOT2	ENSG00000119673	1.18215	5.5833	1.84343e-23	3.79549e-22
YPEL4	ENSG00000166793	1.18394	4.01823	4.10966e-11	3.58633e-10
TMEM126A	ENSG00000171202	1.18528	2.14874	0.000238999	0.000803398
DOCK4-AS1	ENSG00000225572	1.186	4.40005	2.67878e-12	2.62304e-11
ARNT2	ENSG00000172379	1.18753	1.38499	0.000669821	0.00203439
ANTXR1	ENSG00000169604	1.1892	2.93667	2.21902e-06	1.06884e-05
RSBN1L	ENSG00000187257	1.19103	1.47394	0.000956198	0.00280177
PITRM1	ENSG00000107959	1.19123	6.21172	5.78482e-29	1.61206e-27
P4HA2	ENSG00000072682	1.19266	3.74149	3.16748e-09	2.27192e-08
XPO5	ENSG00000124571	1.19284	4.28776	8.39927e-13	8.69527e-12
THADA	ENSG00000115970	1.1934	4.90613	1.21597e-18	1.92056e-17
IL12RB2	ENSG00000081985	1.19558	4.50505	1.29706e-10	1.07619e-09
SYN3	ENSG00000185666	1.19625	3.55161	4.78964e-07	2.5656e-06
RPTOR	ENSG00000141564	1.19636	2.49916	2.10539e-05	8.68133e-05				MTORC1
RP11-174G6.1	ENSG00000214772	1.19674	3.04006	1.6693e-06	8.19894e-06
RP11-439H8.4	ENSG00000237324	1.19676	2.79028	4.76684e-07	2.55487e-06
CYP51A1-AS1	ENSG00000188693	1.19703	2.76208	2.99251e-05	0.000119856
ITGB6	ENSG00000115221	1.19769	2.92518	6.50557e-07	3.41339e-06
HAS1	ENSG00000105509	1.19816	3.81085	6.03383e-11	5.1725e-10
OXNAD1	ENSG00000154814	1.19889	5.96175	2.33584e-21	4.43329e-20
RP11-327F22.4	ENSG00000260616	1.20014	7.27669	9.24867e-39	3.79155e-37
RP11-585P4.5	ENSG00000257497	1.20067	2.8297	1.00343e-07	5.96752e-07
AC092597.3	ENSG00000248254	1.20083	5.65266	4.08124e-24	8.87862e-23
SLC35A4	ENSG00000176087	1.20091	1.4234	0.00102642	0.00299327
FBXO33	ENSG00000165355	1.20206	2.14328	2.8178e-05	0.000113599
FAM167A	ENSG00000154319	1.20303	1.89332	4.9947e-05	0.000192686
RMI2	ENSG00000175643	1.20353	5.21012	9.99464e-17	1.40749e-15
SNW1	ENSG00000100603	1.2039	4.2928	3.31126e-09	2.36951e-08
ZNF865	ENSG00000261221	1.20479	3.2449	2.38793e-07	1.35213e-06
HOXD9	ENSG00000128709	1.20495	1.65663	0.000471977	0.0014865
RP11-343K8.3	ENSG00000264914	1.20604	2.29684	1.579e-05	6.69027e-05
ACBD5	ENSG00000107897	1.20623	1.92283	2.50019e-05	0.000101773
MFSD13A	ENSG00000138111	1.20657	4.45725	7.97185e-16	1.06569e-14
ADAMTS9-AS1	ENSG00000241158	1.20678	3.39739	1.94983e-06	9.46091e-06
UBE2Q2P12	ENSG00000197627	1.20694	1.55066	0.00266826	0.00699604
PI4K2A	ENSG00000155252	1.20752	3.797	2.44922e-10	1.96963e-09
DGKD	ENSG00000077044	1.20818	3.15552	2.95146e-09	2.12027e-08
CELSR3-AS1	ENSG00000228350	1.20861	2.09261	3.48016e-05	0.000138128
IL20RB-AS1	ENSG00000249407	1.20899	3.12504	3.58821e-08	2.28733e-07
AL356053.1	ENSG00000150076	1.21053	6.30128	2.85215e-16	3.91491e-15
DNM3	ENSG00000197959	1.2113	4.17375	1.8022e-09	1.32776e-08
CYP3A4	ENSG00000160868	1.21174	2.67919	1.0949e-05	4.76836e-05
TSPAN11	ENSG00000110900	1.21239	4.47705	2.15007e-12	2.12109e-11
ZFYVE9	ENSG00000157077	1.21244	2.97007	8.93122e-07	4.57675e-06
RP11-277A4.4	ENSG00000203325	1.21305	5.08272	3.45492e-18	5.36501e-17
AC034220.3	ENSG00000233006	1.21387	6.84911	4.09387e-29	1.15128e-27
NR2F1-AS1	ENSG00000237187	1.2151	4.72896	3.40982e-12	3.28771e-11
DIXDC1	ENSG00000150764	1.21609	1.57782	0.000183152	0.00062943
NAPA-AS1	ENSG00000268061	1.21645	9.72122	1.627e-30	4.88841e-29
CASC8	ENSG00000246228	1.21686	1.99816	2.85789e-05	0.000115064
ANKH	ENSG00000154122	1.21713	7.04749	1.03907e-28	2.86957e-27
NAA20	ENSG00000173418	1.21747	5.18589	5.03824e-14	5.86037e-13
AC098828.2	ENSG00000234378	1.21797	2.54713	1.5595e-06	7.70478e-06
NEK4	ENSG00000114904	1.21841	3.71002	1.17452e-09	8.78649e-09
RBCK1	ENSG00000125826	1.2195	2.81421	4.64206e-06	2.13239e-05
IFT46	ENSG00000118096	1.22182	3.88127	2.09593e-12	2.0699e-11
RP11-717K11.2	ENSG00000281028	1.2259	2.2503	0.000115139	0.000412604
SLCO1A2	ENSG00000084453	1.22743	5.73079	1.01451e-19	1.73293e-18
NUDT4	ENSG00000173598	1.22753	4.17982	1.7437e-11	1.57685e-10
RAPGEF4-AS1	ENSG00000228016	1.22852	1.50552	0.000763647	0.00228846
RGMB	ENSG00000174136	1.22876	2.4297	2.23932e-05	9.17613e-05
NPHS1	ENSG00000161270	1.22891	4.5497	7.75955e-14	8.81454e-13
SYNM	ENSG00000182253	1.22948	4.04666	1.11963e-13	1.25333e-12
PCGF1	ENSG00000115289	1.22952	2.69187	0.000174807	0.000603676
RP1-149A16.3	ENSG00000230736	1.22953	3.11378	9.88888e-10	7.46441e-09
RPUSD3	ENSG00000156990	1.22991	1.74439	0.000277006	0.000917453
PIP4K2B	ENSG00000276293	1.23106	4.4876	2.50927e-15	3.21019e-14
NEMP2	ENSG00000189362	1.23201	2.85462	1.52909e-05	6.49969e-05
POPDC3	ENSG00000132429	1.23271	4.05638	2.34982e-11	2.09621e-10
SLC44A5	ENSG00000137968	1.23766	4.81104	2.39652e-13	2.59759e-12
RP11-336K24.12	ENSG00000273002	1.23909	2.0166	8.1247e-06	3.60473e-05
RPGRIP1	ENSG00000092200	1.23915	3.66692	4.98728e-09	3.49299e-08
IFI16	ENSG00000163565	1.24084	1.27925	0.000776835	0.00232345
ZNF341	ENSG00000131061	1.24149	1.32752	0.000302742	0.00099554
SMYD3	ENSG00000185420	1.24194	1.99201	0.000158918	0.000553781
ALDH1L2	ENSG00000136010	1.2422	3.67815	1.22146e-06	6.11327e-06
CLASP1	ENSG00000074054	1.24225	3.3199	3.40535e-09	2.43307e-08
ATP2A1-AS1	ENSG00000260442	1.24232	1.97476	0.000194608	0.000665579
ZNF740	ENSG00000139651	1.24287	2.86084	6.80364e-07	3.5637e-06
SHC3	ENSG00000148082	1.24393	3.67525	3.66447e-06	1.6994e-05
YIF1A	ENSG00000174851	1.24456	2.27071	4.18708e-06	1.92915e-05
AKAP9	ENSG00000127914	1.24514	4.48811	9.5057e-14	1.06797e-12
USP24	ENSG00000162402	1.24552	2.88264	1.33114e-07	7.79585e-07
SMUG1	ENSG00000123415	1.24608	3.59495	2.22501e-10	1.79245e-09
BRE	ENSG00000158019	1.24691	1.94989	1.61493e-05	6.82681e-05
NDUFB6	ENSG00000165264	1.24822	3.1659	6.92233e-07	3.61765e-06
RABGAP1L	ENSG00000152061	1.25022	5.91024	5.33042e-31	1.63893e-29
ALOX12P2	ENSG00000262943	1.25067	3.53002	3.04323e-11	2.68363e-10
RP4-714D9.2	ENSG00000241073	1.25158	9.59443	9.29169e-38	3.61631e-36
RP11-481K16.2	ENSG00000248924	1.25201	3.80975	1.14444e-12	1.17554e-11
GBAP1	ENSG00000160766	1.25269	2.48846	9.87437e-07	5.03489e-06
RP11-512N21.3	ENSG00000257202	1.25457	4.96925	1.21006e-18	1.91451e-17
CTDSP2	ENSG00000175215	1.25787	1.37715	0.000130171	0.000461629
SIRPA	ENSG00000198053	1.25793	1.72926	1.84187e-05	7.69797e-05
OPN3	ENSG00000054277	1.25863	3.50588	3.45127e-11	3.02322e-10
GABARAPL2	ENSG00000034713	1.25984	2.7255	4.17396e-06	1.92503e-05
FAM169A	ENSG00000198780	1.26248	4.85979	3.9023e-12	3.73778e-11
RHOXF1-AS1	ENSG00000258545	1.2637	3.82293	2.80661e-11	2.48447e-10
KMT2E	ENSG00000005483	1.26389	5.56209	2.72411e-19	4.47103e-18
RP11-54F2.1	ENSG00000251196	1.2648	6.52269	3.05246e-20	5.38354e-19
NGEF	ENSG00000066248	1.26507	6.58371	2.48891e-22	4.85363e-21
TPTE2P1	ENSG00000253771	1.2653	1.60709	4.51865e-05	0.000176237
CTB-35F21.4	ENSG00000250692	1.26633	4.85894	4.56081e-19	7.43266e-18
SKP1	ENSG00000113558	1.26637	2.12095	3.23053e-05	0.000128608
ARRDC3-AS1	ENSG00000281357	1.26672	6.20027	1.19968e-24	2.74586e-23
BIRC6-AS2	ENSG00000279897	1.26695	2.5435	6.93288e-08	4.19337e-07
RP11-46A10.6	ENSG00000251520	1.26921	1.51539	0.00245904	0.00650852
XPC	ENSG00000154767	1.26932	3.96276	1.11288e-10	9.28978e-10
PDZK1	ENSG00000174827	1.26945	4.50446	3.66774e-14	4.32624e-13
GRIK1	ENSG00000171189	1.27124	3.87933	4.26763e-13	4.54033e-12
PTOV1-AS1	ENSG00000268006	1.27204	7.78643	1.2493e-43	6.00185e-42
GNRHR	ENSG00000109163	1.27229	2.733	1.16522e-06	5.84764e-06
TMEM51	ENSG00000171729	1.27287	1.86897	4.15627e-06	1.91783e-05
CCDC121	ENSG00000176714	1.27308	1.82059	0.00049562	0.00155338
RANBP9	ENSG00000010017	1.27329	4.69703	6.4259e-12	6.06679e-11
FRMD6-AS2	ENSG00000258537	1.27382	1.73248	0.000608913	0.00186599
CCDC146	ENSG00000135205	1.27383	7.15738	6.53007e-33	2.21446e-31
TMEM206	ENSG00000065600	1.27423	1.58112	0.000120217	0.000428966
RABEP2	ENSG00000177548	1.27429	1.51999	0.000121945	0.000434799
MROH2A	ENSG00000185038	1.27681	2.44021	2.32895e-06	1.11538e-05
MPHOSPH8	ENSG00000196199	1.27884	6.54911	8.54452e-30	2.45529e-28
EMX1	ENSG00000135638	1.28205	4.3826	5.448e-11	4.70528e-10
HIST1H3E	ENSG00000274750	1.28227	2.03101	0.000502356	0.00157129
DOK3	ENSG00000146094	1.28303	1.41335	0.000833332	0.00247609
LRRC71	ENSG00000160838	1.28376	4.68362	1.0114e-11	9.34788e-11
JARID2	ENSG00000008083	1.28451	2.38145	1.53856e-05	6.53693e-05
PROZ	ENSG00000126231	1.2848	5.09175	2.42932e-17	3.50673e-16
ISLR	ENSG00000129009	1.28569	4.37025	3.20379e-15	4.07048e-14
NLRP9	ENSG00000185792	1.28615	3.15322	2.2148e-09	1.61241e-08
ACBD4	ENSG00000181513	1.28746	2.28028	5.1676e-05	0.000198608
QPCTL	ENSG00000011478	1.28777	1.81189	0.000242524	0.00081406
ERI1	ENSG00000104626	1.28815	2.35794	3.62708e-06	1.68376e-05
HOXB-AS4	ENSG00000242207	1.28897	6.50686	8.60765e-34	3.0189e-32
ZBTB48	ENSG00000204859	1.28971	2.47206	2.12308e-07	1.21184e-06
PDE4DIP	ENSG00000178104	1.29108	3.04687	3.48858e-10	2.76449e-09
RAD51B	ENSG00000182185	1.29142	3.59555	8.63054e-08	5.16936e-07
CD302	ENSG00000241399	1.29205	3.53592	4.08319e-05	0.000160474
GREB1L	ENSG00000141449	1.29321	2.98379	4.51791e-07	2.43134e-06
BBS4	ENSG00000140463	1.29433	4.88874	5.01439e-18	7.60736e-17
ZNF513	ENSG00000163795	1.29441	1.8091	2.53704e-05	0.000103182
STARD4-AS1	ENSG00000246859	1.29522	7.68431	4.93218e-50	2.79107e-48
KIF24	ENSG00000186638	1.29603	3.70022	3.15932e-12	3.06109e-11
SRGAP2B	ENSG00000196369	1.29664	1.43848	6.88692e-05	0.000257812
B4GALT2	ENSG00000117411	1.29672	1.40184	5.35154e-05	0.000205335
THRB	ENSG00000151090	1.29719	1.90723	1.93684e-05	8.05825e-05
RP11-677M14.3	ENSG00000250073	1.29866	3.64421	2.75006e-09	1.98177e-08
TUBB1	ENSG00000101162	1.29931	4.59604	1.36614e-16	1.90823e-15
ZDHHC16	ENSG00000171307	1.29934	2.25387	7.92939e-07	4.10211e-06
ARNTL2-AS1	ENSG00000245311	1.30127	8.53526	1.03981e-34	3.791e-33
CTD-2377D24.6	ENSG00000244649	1.302	2.3485	4.23111e-07	2.29036e-06
PCYOX1	ENSG00000116005	1.30223	4.40247	8.30793e-12	7.73283e-11
GOT1	ENSG00000120053	1.30247	1.32917	0.0026589	0.00697348
CUL4B	ENSG00000158290	1.30403	2.81359	6.95906e-06	3.11151e-05
RP11-500M8.7	ENSG00000272921	1.30616	3.15008	2.65861e-08	1.72092e-07
CDC42EP5	ENSG00000167617	1.30642	1.30602	0.000120651	0.000430351
RP11-135A24.2	ENSG00000229327	1.30886	2.5454	8.10009e-07	4.18339e-06
RP11-211N11.5	ENSG00000234393	1.3102	2.82132	2.54258e-08	1.65277e-07
IMMT	ENSG00000132305	1.31049	3.97861	1.37221e-10	1.1291e-09
CCDC150	ENSG00000144395	1.31114	3.79965	1.9476e-09	1.42464e-08
C1orf147	ENSG00000162888	1.31231	6.51235	9.02417e-27	2.28052e-25
TEX2	ENSG00000136478	1.31436	4.56373	2.40284e-14	2.87096e-13
MIA3	ENSG00000154305	1.31565	6.66219	8.76774e-22	1.67788e-20
CCDC90B	ENSG00000137500	1.31673	2.58374	3.33013e-08	2.12722e-07
PEX1	ENSG00000127980	1.31869	6.10313	4.05122e-27	1.04381e-25
MAGI3	ENSG00000081026	1.31875	3.80431	2.05019e-13	2.23534e-12
FAM222A-AS1	ENSG00000255650	1.32097	5.18223	3.54567e-18	5.47826e-17
GLRA1	ENSG00000145888	1.32106	4.23258	3.77481e-14	4.44686e-13
TDRP	ENSG00000180190	1.32246	1.91091	0.000450922	0.00142784
PRDM4	ENSG00000110851	1.32487	2.02814	5.73623e-06	2.59622e-05
AC012668.2	ENSG00000237525	1.326	2.07341	0.000155329	0.000543327
GPR39	ENSG00000183840	1.32641	6.95183	1.14683e-32	3.84666e-31
OSGEPL1-AS1	ENSG00000253559	1.32675	2.5825	5.28934e-07	2.80761e-06
HEATR1	ENSG00000119285	1.32721	7.85642	3.21078e-49	1.79493e-47
FHOD1	ENSG00000135723	1.32758	3.98993	6.35551e-14	7.27335e-13
SLC1A1	ENSG00000106688	1.3294	4.72868	1.39291e-15	1.81986e-14
RP11-495P10.10	ENSG00000225871	1.3296	3.18016	2.06523e-10	1.66956e-09
RP11-154H23.4	ENSG00000277855	1.3298	1.3828	0.000494818	0.00155192
CXCR6	ENSG00000172215	1.33009	1.28179	6.27042e-05	0.000236997
XBP1	ENSG00000100219	1.33034	2.00269	5.43117e-05	0.000207872
TMEM150C	ENSG00000249242	1.33331	2.72411	3.43329e-07	1.88841e-06
SLC17A5	ENSG00000119899	1.33376	2.2388	1.18541e-05	5.13343e-05
ZNF420	ENSG00000197050	1.33501	3.63675	1.71448e-07	9.91055e-07
RAPGEF3	ENSG00000079337	1.33621	3.76006	5.79991e-14	6.67895e-13
SEC24D	ENSG00000150961	1.33637	4.4416	2.42399e-15	3.1054e-14
MRPS14	ENSG00000120333	1.33764	5.199	2.70824e-19	4.4529e-18
LIPC	ENSG00000166035	1.338	4.47404	1.26943e-09	9.45051e-09
EPHX1	ENSG00000143819	1.33961	6.57429	1.4661e-39	6.20335e-38
CHRNB4	ENSG00000117971	1.34009	1.73479	6.61236e-05	0.000248644
CTB-111H14.1	ENSG00000243797	1.34161	2.89741	9.92424e-08	5.9097e-07
NAALADL1	ENSG00000168060	1.34325	1.56278	1.48198e-05	6.31399e-05
XXbac-BPG299F13.14	ENSG00000271821	1.34407	3.33794	4.64955e-09	3.27886e-08
RP11-2H8.2	ENSG00000257410	1.34697	4.35956	4.04542e-12	3.87085e-11
SPACA9	ENSG00000165698	1.34744	1.30112	0.000367827	0.00118611
SGSM2	ENSG00000141258	1.34817	4.56585	2.11754e-17	3.07594e-16
ATL1	ENSG00000198513	1.35098	4.59736	4.19211e-14	4.90711e-13
PRMT9	ENSG00000164169	1.35115	2.81536	4.65397e-09	3.27947e-08
WNT4	ENSG00000162552	1.35179	2.62924	6.09935e-06	2.74843e-05
ARHGEF16	ENSG00000130762	1.35217	1.55198	0.000325272	0.00106205
IARS2	ENSG00000067704	1.35342	2.50418	8.13801e-09	5.55215e-08
ZBTB17	ENSG00000116809	1.35439	3.60742	2.28772e-09	1.66157e-08
PTPN1	ENSG00000196396	1.35632	2.10909	6.99364e-06	3.12394e-05
PCOLCE2	ENSG00000163710	1.35718	1.97702	8.08515e-06	3.59063e-05
CTD-2538C1.3	ENSG00000267567	1.35923	1.8909	0.000177137	0.000611035
RP11-422P24.11	ENSG00000272654	1.36048	2.98337	9.48826e-08	5.66471e-07
C12orf40	ENSG00000180116	1.36304	7.115	5.04977e-23	1.01701e-21
NTAN1	ENSG00000157045	1.3631	1.99747	5.05505e-06	2.30716e-05
CPB2	ENSG00000080618	1.36351	3.09944	1.78205e-09	1.31501e-08
DRAM1	ENSG00000136048	1.36424	2.03946	3.10135e-05	0.000123732
INPP5E	ENSG00000148384	1.36448	1.76713	9.77248e-06	4.28836e-05
ACTL6A	ENSG00000136518	1.36697	4.50127	9.80676e-17	1.38314e-15
C7orf71	ENSG00000222004	1.36733	2.11332	1.31197e-06	6.55205e-06
TRIB3	ENSG00000101255	1.3677	1.69283	3.57698e-06	1.66301e-05
TBP	ENSG00000112592	1.37156	2.04566	0.000418099	0.00133122
RRBP1	ENSG00000125844	1.37156	8.77798	6.61046e-27	1.68906e-25
KATNAL2	ENSG00000167216	1.37182	5.20102	5.85765e-20	1.01562e-18
CCDC110	ENSG00000168491	1.37369	1.54038	7.93489e-06	3.529e-05
CUL1	ENSG00000055130	1.37547	4.03348	3.0127e-14	3.56728e-13
RP11-104H15.8	ENSG00000263301	1.37608	4.6577	5.86174e-19	9.46913e-18
NREP	ENSG00000134986	1.37651	3.39398	5.55848e-11	4.78725e-10
RMND1	ENSG00000155906	1.37753	4.08218	7.01865e-15	8.63201e-14
MCMBP	ENSG00000197771	1.37812	2.58567	5.16618e-07	2.74498e-06
RNF144A	ENSG00000151692	1.37922	1.54859	6.72833e-05	0.00025249
PLAUR	ENSG00000011422	1.38256	1.99253	7.66866e-07	3.97838e-06
SUPT16HP1	ENSG00000256238	1.38453	2.17313	4.03486e-06	1.86367e-05
STXBP5L	ENSG00000145087	1.38459	4.85322	1.59052e-17	2.3436e-16
CD96	ENSG00000153283	1.38527	5.10246	1.05726e-18	1.6814e-17
SLC9C1	ENSG00000172139	1.38691	5.44242	9.14056e-24	1.93154e-22
ORC1	ENSG00000085840	1.38783	1.69925	2.78699e-06	1.32103e-05
SCMH1	ENSG00000010803	1.38824	7.29821	1.9031e-44	9.38728e-43
GALM	ENSG00000143891	1.39012	5.20649	3.08037e-23	6.32814e-22
RP11-302M6.4	ENSG00000271949	1.39029	3.14763	9.19904e-09	6.25291e-08
BACH1	ENSG00000156273	1.39053	3.15199	2.48055e-10	1.99308e-09
RP11-964E11.3	ENSG00000283098	1.39102	2.38906	1.55684e-07	9.05441e-07
IFITM2	ENSG00000185201	1.39114	5.43333	8.30613e-27	2.11646e-25
RP11-775B15.2	ENSG00000253398	1.39185	5.30785	4.3113e-18	6.61688e-17
LHFPL2	ENSG00000145685	1.39205	4.17547	1.12266e-14	1.36434e-13
ARHGEF26	ENSG00000114790	1.39481	3.25348	2.05634e-05	8.49046e-05
TNS1	ENSG00000079308	1.3969	3.60467	9.81479e-11	8.21521e-10
RP11-667K14.5	ENSG00000262810	1.39864	3.37024	6.78717e-09	4.66504e-08
RP11-44I10.3	ENSG00000261267	1.39897	7.99349	1.69071e-47	9.0669e-46
MAMDC4	ENSG00000177943	1.39899	2.97005	5.10032e-08	3.15953e-07
CD160	ENSG00000117281	1.40026	5.11271	1.56499e-15	2.03317e-14
DENND4C	ENSG00000137145	1.40525	4.63124	2.33993e-11	2.0894e-10
RP11-470M17.2	ENSG00000254143	1.40657	7.05351	5.58299e-37	2.11055e-35
AC093162.5	ENSG00000246575	1.40747	3.57371	6.83983e-12	6.45098e-11
BCAR3	ENSG00000137936	1.40791	5.46909	1.80858e-20	3.25828e-19
RP11-156K23.3	ENSG00000275202	1.40793	3.49239	2.93366e-14	3.48264e-13
EPB42	ENSG00000166947	1.4084	8.57297	4.75644e-55	3.02575e-53
MAST2	ENSG00000086015	1.40848	4.44185	6.85678e-10	5.24871e-09
PDE8B	ENSG00000113231	1.41311	5.57191	5.51787e-24	1.18641e-22
RP11-770G2.2	ENSG00000255557	1.41317	4.94709	3.96482e-23	8.05539e-22
E4F1	ENSG00000167967	1.41479	2.55754	4.00409e-08	2.52798e-07
SAMD4B	ENSG00000179134	1.41502	1.62889	0.000214695	0.000725666
ZNF285B	ENSG00000176761	1.41626	3.19679	3.4949e-10	2.76712e-09
SMG7	ENSG00000116698	1.41667	5.61903	1.50544e-24	3.37957e-23
ADRA1D	ENSG00000171873	1.4183	5.86315	2.92895e-31	9.12725e-30
WBP4	ENSG00000120688	1.42207	2.15445	0.00136205	0.0038536
CFLAR-AS1	ENSG00000226312	1.42284	7.00111	1.88833e-43	9.02484e-42
THUMPD3	ENSG00000134077	1.42606	6.4059	7.25766e-28	1.94042e-26
AP1G2	ENSG00000213983	1.42672	8.33674	4.045e-40	1.74351e-38
EXOC3L1	ENSG00000179044	1.42712	2.60692	2.43355e-09	1.76193e-08
EIF2S1	ENSG00000134001	1.42815	2.96839	1.16009e-06	5.83072e-06
WDR55	ENSG00000120314	1.43055	6.54971	6.73038e-39	2.79678e-37
CHTF8	ENSG00000168802	1.43181	3.41878	6.61982e-09	4.56362e-08
SLC35F4	ENSG00000151812	1.4391	2.021	9.03575e-07	4.62518e-06
RP5-1024N4.2	ENSG00000223720	1.44166	1.64828	2.06269e-06	9.98227e-06
POLDIP3	ENSG00000100227	1.44467	1.71623	8.06861e-05	0.000297224
RP11-29H23.7	ENSG00000271267	1.44566	2.57389	6.21e-08	3.79596e-07
RP11-353N4.5	ENSG00000234232	1.44666	1.7548	8.82037e-06	3.89092e-05
PSMD3	ENSG00000108344	1.44735	2.23713	2.6516e-07	1.48683e-06
HPN-AS1	ENSG00000227392	1.45252	2.27925	1.11118e-07	6.57441e-07
PTPRS	ENSG00000105426	1.45345	1.95595	1.0394e-07	6.16553e-07
MAPKAPK5	ENSG00000089022	1.45376	2.62983	7.80163e-06	3.47141e-05
KIAA1755	ENSG00000149633	1.45498	6.85172	5.05547e-44	2.48041e-42
C6orf106	ENSG00000196821	1.45749	1.92999	8.32836e-07	4.28927e-06
PSD	ENSG00000059915	1.45831	3.33358	1.06181e-12	1.09432e-11
LANCL2	ENSG00000132434	1.45969	1.83329	6.17413e-07	3.24873e-06
PSME2	ENSG00000100911	1.46033	2.40092	6.37929e-06	2.8606e-05
OGFR-AS1	ENSG00000229873	1.46135	4.53273	3.1719e-17	4.55726e-16
ALG6	ENSG00000088035	1.4633	1.37612	0.000171267	0.000592338
RP11-823E8.3	ENSG00000274021	1.46331	2.75134	1.66766e-07	9.6563e-07
SWT1	ENSG00000116668	1.46355	4.24376	2.43882e-14	2.91018e-13
ASH1L	ENSG00000116539	1.46384	3.63065	1.38037e-15	1.80604e-14
RP11-115C10.1	ENSG00000254607	1.46627	2.56531	2.54664e-06	1.21522e-05
PDIA6	ENSG00000143870	1.46692	2.56814	2.15517e-06	1.0408e-05
PSMA4	ENSG00000041357	1.46751	1.99903	2.61818e-07	1.46898e-06
ZFAND2B	ENSG00000158552	1.46843	5.29175	2.80472e-29	7.93581e-28
ISM1	ENSG00000101230	1.46844	3.45267	1.33759e-11	1.22521e-10
PIAS4	ENSG00000105229	1.46867	2.28531	2.46822e-07	1.39249e-06
EHD4-AS1	ENSG00000259883	1.47225	1.61192	2.31296e-06	1.10945e-05
FBXO41	ENSG00000163013	1.47263	2.78948	2.62153e-08	1.70049e-07
KLHL29	ENSG00000119771	1.474	3.43498	7.57031e-12	7.0964e-11
TMEM129	ENSG00000168936	1.47638	1.61588	4.49188e-06	2.06443e-05
TRMT13	ENSG00000122435	1.4779	1.76736	7.65782e-07	3.97664e-06
TMC5	ENSG00000103534	1.48251	3.12767	1.94098e-09	1.42092e-08
EIF5A	ENSG00000132507	1.48259	4.99588	2.17585e-25	5.14617e-24
GNE	ENSG00000159921	1.4838	4.50591	5.36534e-13	5.63666e-12
WI2-1896O14.1	ENSG00000215861	1.48606	5.28814	6.51986e-30	1.88524e-28
TAF9B	ENSG00000187325	1.48777	7.02123	6.0664e-45	3.02467e-43
ERP44	ENSG00000023318	1.48912	5.27016	3.20264e-23	6.55014e-22
SERPINE1	ENSG00000106366	1.48943	3.66197	6.20551e-10	4.77793e-09
ARNTL	ENSG00000133794	1.49014	5.18497	1.71173e-16	2.37787e-15
GJB7	ENSG00000164411	1.4906	2.81185	1.02649e-11	9.47781e-11
RP11-296E7.1	ENSG00000218418	1.49165	3.04695	6.77546e-09	4.66342e-08
TMEFF2	ENSG00000144339	1.49168	4.9227	1.67729e-23	3.4767e-22
EPHB1	ENSG00000154928	1.4944	1.51869	1.92156e-06	9.34342e-06
NAXD	ENSG00000213995	1.49489	1.56119	3.41641e-06	1.59559e-05
NECAB1	ENSG00000123119	1.49534	4.34215	4.81766e-15	6.03778e-14
TMEM123	ENSG00000152558	1.49848	6.27308	4.67503e-24	1.01465e-22
PLPPR3	ENSG00000129951	1.49968	3.82884	1.39822e-11	1.27695e-10
C1orf168	ENSG00000187889	1.49988	2.10534	7.21907e-09	4.93981e-08
NECTIN4	ENSG00000143217	1.50113	2.56046	9.59427e-11	8.05988e-10
LINC01135	ENSG00000234807	1.50195	3.28973	9.1978e-10	6.95414e-09
ANKRD28	ENSG00000206560	1.5047	3.02937	1.41336e-09	1.04714e-08
RP11-672A2.3	ENSG00000254975	1.50519	2.81548	2.7229e-09	1.96373e-08
CELSR3	ENSG00000008300	1.50621	1.90345	1.12204e-06	5.64938e-06
ZC3H12A	ENSG00000163874	1.5066	2.06877	4.99146e-08	3.09908e-07
H2AFY2	ENSG00000099284	1.50678	5.5825	1.06825e-25	2.56602e-24
RP3-453C12.15	ENSG00000277022	1.50795	3.80676	1.47326e-17	2.18128e-16
OVOS2	ENSG00000177359	1.50828	4.43511	2.60148e-19	4.29268e-18
IL21R	ENSG00000103522	1.51084	2.93016	3.39969e-10	2.69637e-09
IGLON5	ENSG00000142549	1.51191	4.22194	1.63299e-19	2.75572e-18
DNAH1	ENSG00000114841	1.51604	3.00435	8.51042e-12	7.91332e-11
RGMA	ENSG00000182175	1.51666	2.57527	4.36643e-06	2.00878e-05
GTF2I	ENSG00000263001	1.51853	5.00318	9.69545e-29	2.68561e-27
ST6GALNAC2	ENSG00000070731	1.52029	3.07205	7.22887e-11	6.15121e-10
RP11-862L9.3	ENSG00000266844	1.52269	2.48526	3.54284e-09	2.52739e-08
LDHAL6B	ENSG00000171989	1.5236	3.06332	2.80851e-12	2.74134e-11
HOXB-AS1	ENSG00000230148	1.52491	4.29861	2.83309e-20	5.00621e-19
PCNX2	ENSG00000135749	1.5278	3.53848	1.24606e-12	1.27002e-11
DNAJC7	ENSG00000168259	1.53094	6.13381	1.86492e-38	7.5118e-37
NUTM2G	ENSG00000188152	1.53397	4.76615	2.71239e-16	3.72863e-15
NSG1	ENSG00000168824	1.53455	1.48211	9.90614e-07	5.04273e-06
SLC12A4	ENSG00000124067	1.53522	2.35387	8.46028e-06	3.73744e-05
CCT8	ENSG00000156261	1.53771	1.75602	4.90792e-07	2.62135e-06
DIO1	ENSG00000211452	1.53771	3.33756	1.26867e-13	1.41501e-12
CYB561	ENSG00000008283	1.54009	2.49348	1.46076e-10	1.19769e-09
TMEM9B-AS1	ENSG00000254860	1.54542	2.57212	1.2002e-09	8.97132e-09
FKBP7	ENSG00000079150	1.54548	2.81087	3.87188e-07	2.11702e-06
EXOC6B	ENSG00000144036	1.54825	1.76519	4.31898e-06	1.98893e-05
WDR74	ENSG00000133316	1.54867	1.89354	2.26376e-06	1.08812e-05
GZF1	ENSG00000125812	1.5502	3.69658	7.41621e-17	1.05242e-15
NUDCD2	ENSG00000170584	1.5503	5.01127	2.15954e-16	2.98645e-15
AK5	ENSG00000154027	1.55129	2.00833	4.175e-07	2.26664e-06
MIR3190	ENSG00000265134	1.55156	2.44646	7.28003e-07	3.78742e-06
KCNH3	ENSG00000135519	1.55231	5.14581	2.46606e-24	5.46381e-23
FSTL4	ENSG00000053108	1.5528	3.16801	1.56893e-08	1.0389e-07
STEAP3	ENSG00000115107	1.55594	1.99834	4.23291e-08	2.66134e-07
PVT1	ENSG00000249859	1.55605	2.75758	1.48067e-08	9.83981e-08
ERAP2	ENSG00000164308	1.55615	2.14119	2.33307e-07	1.32595e-06
GINS1	ENSG00000101003	1.55615	2.57793	3.0514e-10	2.44324e-09
PFDN1	ENSG00000113068	1.55762	2.625	2.39134e-11	2.13118e-10
UGP2	ENSG00000169764	1.55896	3.22726	7.70289e-10	5.8575e-09
CTD-2521M24.6	ENSG00000269481	1.55916	5.2498	5.18971e-32	1.70355e-30
SLC16A11	ENSG00000174326	1.56138	1.64497	3.28265e-05	0.000130626					ATG5	ENSG00000057663	1.56365
ELF2	ENSG00000109381	1.56223	6.9873	4.01536e-42	1.85188e-40
ATG5	ENSG00000057663	1.56365	5.93867	2.33838e-39	9.84896e-38
SETD1A	ENSG00000099381	1.56428	3.04873	8.79338e-14	9.95217e-13
CTIF	ENSG00000134030	1.56477	3.66219	4.66364e-10	3.6363e-09
ADAMTS9-AS2	ENSG00000241684	1.56485	3.12424	5.87854e-13	6.14781e-12
THOC1	ENSG00000079134	1.56647	3.22302	1.75381e-10	1.42908e-09
SPON1	ENSG00000262655	1.56723	3.97551	1.38363e-14	1.67269e-13
RNPEPL1	ENSG00000142327	1.57065	2.16252	3.71553e-06	1.72222e-05
GTF2IRD1	ENSG00000006704	1.5708	2.03913	6.78221e-08	4.11093e-07
RP11-277P12.20	ENSG00000245648	1.57119	1.98029	0.000124571	0.000443474
CSPP1	ENSG00000104218	1.5712	5.97122	8.00384e-36	2.98896e-34
C1QTNF1-AS1	ENSG00000265096	1.57227	5.25386	1.5776e-18	2.47059e-17
TTC31	ENSG00000115282	1.57292	3.42548	4.00444e-13	4.27017e-12
VSIG10	ENSG00000176834	1.57554	3.70128	1.74546e-16	2.42107e-15
AMBP	ENSG00000106927	1.57611	3.0366	6.42443e-13	6.69593e-12
VDAC1	ENSG00000213585	1.57672	1.70008	9.76882e-06	4.28836e-05
SOX15	ENSG00000129194	1.57792	4.36037	1.79578e-23	3.70565e-22
SEPT4-AS1	ENSG00000264672	1.57871	5.397	6.7312e-39	2.79678e-37
RP11-513G11.2	ENSG00000228271	1.57932	2.94144	2.90634e-11	2.56782e-10
ABLIM2	ENSG00000163995	1.58529	5.67137	6.66002e-32	2.1631e-30
TRPC7	ENSG00000069018	1.58828	4.99261	4.76329e-21	8.84036e-20
ZNF511-PRAP1	ENSG00000283496	1.59055	4.83842	9.41592e-28	2.49978e-26
DNAJA4	ENSG00000140403	1.59176	4.22839	4.80209e-18	7.29728e-17
MGC16275	ENSG00000246731	1.59198	3.33283	1.02485e-14	1.24878e-13
CTB-33O18.3	ENSG00000253955	1.5926	2.35694	7.39267e-09	5.05111e-08
ZNF451	ENSG00000112200	1.59283	1.69386	1.32782e-06	6.62046e-06
TANGO6	ENSG00000103047	1.59388	1.404	0.000165448	0.000573717
PRTFDC1	ENSG00000099256	1.59721	1.5924	9.70234e-07	4.94991e-06
RP1-28O10.1	ENSG00000227591	1.59768	2.73376	6.89249e-11	5.87582e-10
DNAH17-AS1	ENSG00000267432	1.59839	1.8	2.91283e-07	1.6205e-06
TGM2	ENSG00000198959	1.59868	3.77894	3.35569e-11	2.94229e-10
SECTM1	ENSG00000141574	1.599	2.60309	4.78794e-09	3.36616e-08
CEP295	ENSG00000166004	1.59955	5.98336	8.96811e-34	3.1334e-32
CTB-129P6.4	ENSG00000267282	1.6006	9.58297	2.06413e-50	1.18997e-48
CRIM1	ENSG00000150938	1.60099	5.44959	3.16851e-27	8.20965e-26
FAM230B	ENSG00000215498	1.60157	3.56926	3.3512e-11	2.94115e-10
RP11-680F20.9	ENSG00000255027	1.60288	1.56384	4.43896e-07	2.39725e-06
DENND2D	ENSG00000162777	1.60473	1.55016	2.67726e-05	0.000108502
LIG1	ENSG00000105486	1.60596	3.20409	7.39931e-12	6.94316e-11
HEATR9	ENSG00000270379	1.60602	2.88338	1.35076e-12	1.36766e-11
CDH4	ENSG00000179242	1.60735	3.61971	1.57579e-18	2.47059e-17
POLH	ENSG00000170734	1.60779	4.70847	1.3424e-22	2.65714e-21
RP11-456N14.4	ENSG00000283148	1.60865	3.10908	6.43352e-13	6.69783e-12
SEMA4D	ENSG00000187764	1.60879	6.11234	5.57247e-28	1.49855e-26
RP11-428P16.2	ENSG00000213514	1.61073	2.08306	4.23648e-09	3.00133e-08
RP11-589M4.3	ENSG00000258698	1.61635	2.28195	7.03066e-09	4.81804e-08
TUBD1	ENSG00000108423	1.6182	2.07684	2.01374e-05	8.33322e-05
ANGPT4	ENSG00000101280	1.61881	2.36369	2.20898e-09	1.60945e-08
PAXIP1	ENSG00000157212	1.61982	6.74169	2.54495e-43	1.20383e-41
PQBP1	ENSG00000102103	1.62249	3.14039	1.03645e-15	1.37756e-14
HMOX2	ENSG00000103415	1.62306	1.46148	1.57595e-05	6.68042e-05
PHC3	ENSG00000173889	1.62315	2.48398	1.30717e-10	1.08289e-09
AC019048.1	ENSG00000223884	1.62669	2.62793	2.10718e-08	1.38241e-07
GSDMD	ENSG00000104518	1.62709	5.68602	4.13084e-38	1.64236e-36
ZNF561-AS1	ENSG00000267106	1.62833	2.20895	2.36835e-07	1.34352e-06
SRPX2	ENSG00000102359	1.62876	3.36541	1.8307e-09	1.34768e-08
MUC12	ENSG00000205277	1.62911	4.3702	1.14914e-15	1.52076e-14
AC006262.5	ENSG00000268621	1.63026	4.20134	2.44732e-22	4.81323e-21
CTD-2267D19.3	ENSG00000266208	1.63082	4.55579	2.69598e-27	7.04468e-26
CCDC84	ENSG00000186166	1.63143	2.4684	1.07111e-07	6.34547e-07
PDE3B	ENSG00000152270	1.63697	3.42391	3.26495e-15	4.14249e-14
APOBEC2	ENSG00000124701	1.63785	2.26351	7.82947e-08	4.71096e-07
CTD-3064C13.1	ENSG00000255372	1.63991	4.36884	2.09308e-24	4.65219e-23
RUFY3	ENSG00000018189	1.64056	2.20484	1.31585e-08	8.7952e-08
SEC16A	ENSG00000148396	1.64322	2.60299	5.21883e-10	4.04186e-09
GRIN2B	ENSG00000273079	1.64477	3.21343	8.99521e-15	1.10042e-13
GMPR2	ENSG00000100938	1.64579	5.8141	7.27603e-34	2.58131e-32
FAM83H-AS1	ENSG00000203499	1.64758	3.18815	3.31419e-16	4.5289e-15
DNAJC5	ENSG00000101152	1.64849	2.51387	1.18907e-07	7.00379e-07
ZRSR2	ENSG00000169249	1.64986	2.12641	9.0651e-06	3.99314e-05
C1QBP	ENSG00000108561	1.65064	2.57993	1.2741e-08	8.54088e-08
ATP5H	ENSG00000167863	1.65167	2.18833	1.55322e-08	1.02997e-07
NUP210L	ENSG00000143552	1.65184	4.07412	5.47494e-14	6.35231e-13
WNT8B	ENSG00000075290	1.65812	3.73934	1.17312e-18	1.85926e-17
JAM2	ENSG00000154721	1.6613	3.82512	1.95644e-11	1.7606e-10
SLC48A1	ENSG00000211584	1.66357	2.83767	3.09659e-12	3.00663e-11
SDCBP2	ENSG00000125775	1.66604	1.71595	2.40278e-06	1.14836e-05
IFITM3	ENSG00000142089	1.66711	4.61031	5.54199e-22	1.07394e-20
SUSD5	ENSG00000173705	1.66827	3.68935	5.91645e-16	7.9669e-15
VPS16	ENSG00000215305	1.67032	2.34623	5.95223e-07	3.14453e-06
SLC8A1-AS1	ENSG00000227028	1.67108	5.42745	5.31686e-40	2.28106e-38
CHPT1	ENSG00000111666	1.67117	3.84989	4.28379e-10	3.36287e-09
ZFHX2	ENSG00000136367	1.67262	2.22	5.12744e-07	2.72597e-06
CPNE2	ENSG00000140848	1.67596	3.12521	1.44296e-12	1.45782e-11
SGPL1	ENSG00000166224	1.67703	2.81024	6.83026e-10	5.23275e-09
MIR4435-2HG	ENSG00000172965	1.67821	3.29466	1.33036e-10	1.10056e-09
RP4-734G22.3	ENSG00000272078	1.67923	3.59539	2.27598e-17	3.30088e-16
CDSN	ENSG00000204539	1.6795	4.70446	5.75629e-29	1.60897e-27
SLC2A12	ENSG00000146411	1.6808	2.59999	4.23076e-07	2.29036e-06
AANAT	ENSG00000129673	1.6811	4.53562	2.56209e-24	5.65376e-23
THEM6	ENSG00000130193	1.68318	2.89415	6.55175e-13	6.81323e-12
RUNDC3A	ENSG00000108309	1.68672	1.93474	5.17398e-08	3.20301e-07
RP11-572M11.4	ENSG00000240057	1.68723	3.0356	1.15667e-14	1.40383e-13
TTPAL	ENSG00000124120	1.68936	3.71943	4.22007e-17	6.03503e-16
RNGTT	ENSG00000111880	1.68998	5.79864	2.96001e-18	4.61201e-17
LINC00534	ENSG00000253394	1.69106	2.95355	2.53107e-13	2.73699e-12
LMOD1	ENSG00000163431	1.69193	4.46269	1.17494e-22	2.34074e-21
RP11-627G18.1	ENSG00000266283	1.69249	3.84705	4.51033e-15	5.67576e-14
RP11-58K22.5	ENSG00000254693	1.69672	2.445	1.07231e-09	8.04796e-09
PNRC2	ENSG00000189266	1.69763	3.11677	1.60253e-10	1.3116e-09
CTD-2201E18.3	ENSG00000177738	1.69924	8.81776	1.57045e-76	1.36659e-74
TTLL9	ENSG00000131044	1.69938	2.67796	6.29924e-09	4.34912e-08
KAT2B	ENSG00000114166	1.69952	2.80156	3.09078e-10	2.46625e-09
MAP3K3	ENSG00000198909	1.70012	1.76729	4.01489e-08	2.53306e-07
NID2	ENSG00000087303	1.70169	5.2434	4.12693e-23	8.34799e-22
ATP9B	ENSG00000166377	1.70232	3.12763	4.61712e-10	3.60308e-09
FXR2	ENSG00000129245	1.70327	6.24591	9.45664e-39	3.85965e-37
FKBP3	ENSG00000100442	1.70648	3.01917	1.38226e-11	1.26487e-10
CDKN2C	ENSG00000123080	1.70656	2.45471	7.09757e-12	6.67359e-11
TACR2	ENSG00000075073	1.70815	3.43311	4.96768e-19	8.05306e-18
SIPA1	ENSG00000213445	1.7097	2.02351	5.4405e-10	4.21e-09
NIPA1	ENSG00000170113	1.70994	2.36609	2.81148e-08	1.80971e-07
MAP2K1	ENSG00000169032	1.71031	5.49462	2.0787e-24	4.63137e-23
ABCA9-AS1	ENSG00000231749	1.71042	2.46204	3.60657e-09	2.57087e-08
USP40	ENSG00000085982	1.7111	4.51103	1.31338e-22	2.60529e-21
HFE	ENSG00000010704	1.71339	2.64314	4.75954e-08	2.96836e-07
RP11-315I20.3	ENSG00000244619	1.71451	1.95984	4.28232e-08	2.68891e-07
VPS54	ENSG00000143952	1.71583	4.4748	2.40542e-21	4.55597e-20
BOC	ENSG00000144857	1.71771	4.06054	5.00983e-21	9.27926e-20
UCKL1	ENSG00000198276	1.71808	2.1393	1.77433e-08	1.1707e-07
KIF22	ENSG00000079616	1.72211	4.68764	6.92825e-31	2.12313e-29
POLR3C	ENSG00000186141	1.72352	2.52441	1.18367e-11	1.08746e-10
RP11-793J2.1	ENSG00000283667	1.72537	1.74002	6.13657e-09	4.23998e-08
HSD3BP5	ENSG00000198857	1.72538	3.26331	7.25464e-17	1.03108e-15
TBPL1	ENSG00000028839	1.72897	5.32474	6.6841e-34	2.38969e-32
STX17	ENSG00000136874	1.73028	3.5826	1.68551e-09	1.24477e-08
LRRN4	ENSG00000125872	1.73264	2.03633	5.7132e-07	3.02171e-06
CTD-2600O9.1	ENSG00000187185	1.7327	5.19322	3.44783e-37	1.30875e-35
NFIB	ENSG00000147862	1.7335	4.32042	1.14333e-23	2.39139e-22
LACTB	ENSG00000103642	1.73442	1.98903	2.62947e-08	1.70325e-07
BAIAP2L1	ENSG00000006453	1.73502	4.91839	9.53774e-32	3.03366e-30
FAM20A	ENSG00000108950	1.73519	5.93208	4.99787e-32	1.64644e-30
TADA2B	ENSG00000173011	1.73691	3.25045	1.2411e-15	1.63094e-14
TNRC6C	ENSG00000078687	1.73969	2.17661	3.62679e-08	2.30873e-07
RHOBTB1	ENSG00000072422	1.74408	2.03426	3.88901e-08	2.46375e-07
RFTN2	ENSG00000162944	1.74874	4.76788	1.13289e-18	1.79859e-17
PODXL	ENSG00000128567	1.75024	4.21622	4.32957e-25	1.00848e-23
LPIN2	ENSG00000101577	1.75258	2.79867	2.50265e-11	2.22393e-10
MEGF11	ENSG00000157890	1.75266	4.88354	4.66024e-21	8.68406e-20
PRKRA	ENSG00000180228	1.75472	8.36623	1.91269e-56	1.23375e-54
DNAJB13	ENSG00000187726	1.76012	4.52435	3.18759e-23	6.53385e-22
NIF3L1	ENSG00000196290	1.7614	3.23655	4.97978e-15	6.22405e-14
USP49	ENSG00000164663	1.76833	3.83068	7.97178e-16	1.06569e-14
PNO1	ENSG00000115946	1.76872	2.65593	5.74202e-09	3.98528e-08
UBE2R2	ENSG00000107341	1.76912	2.96948	1.16516e-12	1.19549e-11
SMC1B	ENSG00000077935	1.76962	2.52832	1.96194e-11	1.76338e-10
AC013444.1	ENSG00000229781	1.77339	2.72532	4.69486e-14	5.47476e-13
PLCD3	ENSG00000161714	1.77406	2.15838	2.87056e-07	1.59892e-06
LEXM	ENSG00000162398	1.77471	1.80154	3.32067e-10	2.64051e-09
ALS2CR12	ENSG00000155749	1.77522	4.61545	3.93293e-23	8.00824e-22
RPRD1A	ENSG00000141425	1.77882	2.14872	4.04767e-10	3.18836e-09
RP11-50D16.4	ENSG00000273507	1.77967	2.08522	2.11507e-08	1.38659e-07
AP1S2	ENSG00000182287	1.77977	4.20358	2.74225e-14	3.25961e-13
MCC	ENSG00000171444	1.77985	3.99168	1.6998e-19	2.86112e-18
EML6	ENSG00000214595	1.78165	3.38454	1.3256e-12	1.34514e-11
MTUS1	ENSG00000129422	1.7824	3.42856	2.16781e-15	2.78882e-14
RP4-791M13.4	ENSG00000255148	1.78545	1.92931	5.06326e-10	3.92796e-09
RAB26	ENSG00000167964	1.78575	3.13764	3.82449e-14	4.49963e-13
NUP50-AS1	ENSG00000226328	1.78872	3.47068	5.35859e-13	5.63599e-12
CRTAC1	ENSG00000095713	1.79007	6.05171	5.27476e-43	2.45729e-41
RUSC1	ENSG00000160753	1.7911	3.73025	1.36745e-16	1.90823e-15
PDZD9	ENSG00000155714	1.7915	3.94954	1.03165e-23	2.17259e-22
RP11-169K16.4	ENSG00000224459	1.79183	2.90874	5.9436e-16	7.9918e-15
RAVER2	ENSG00000162437	1.79196	5.40834	1.23441e-30	3.74546e-29
RP5-1029F21.3	ENSG00000263015	1.79419	2.97091	5.04606e-15	6.29836e-14
RWDD1	ENSG00000111832	1.79444	1.99173	1.54384e-07	8.98444e-07
CFAP43	ENSG00000197748	1.79989	3.76191	1.08343e-11	9.9836e-11
LRRN2	ENSG00000170382	1.8	5.11601	1.52424e-41	6.9602e-40
RASSF3	ENSG00000153179	1.80293	1.66755	2.00614e-07	1.15007e-06
NSUN5P1	ENSG00000223705	1.80441	3.93363	1.30645e-26	3.28357e-25
NCBP2	ENSG00000114503	1.80472	2.89147	4.03396e-15	5.09716e-14
RNF167	ENSG00000108523	1.80546	2.89953	1.13664e-12	1.16883e-11
RP11-626G3.1	ENSG00000280182	1.80772	4.41253	1.35475e-26	3.39571e-25
PKD1L3	ENSG00000277481	1.81273	4.5382	1.46818e-31	4.6063e-30
RP11-1060J15.4	ENSG00000256377	1.81378	4.39283	6.96667e-26	1.69553e-24
RP11-47A8.5	ENSG00000272933	1.8142	1.83006	6.12795e-10	4.72216e-09
RBPMS	ENSG00000157110	1.8184	5.48218	3.56611e-34	1.27991e-32
TTC39A	ENSG00000085831	1.82079	2.18232	1.94928e-10	1.57859e-09
OSGIN2	ENSG00000164823	1.82223	2.91728	2.41659e-13	2.61627e-12
SPRED2	ENSG00000198369	1.82223	5.99063	5.77516e-47	3.00961e-45
IL16	ENSG00000172349	1.82687	4.71216	2.78042e-30	8.19379e-29
GTF2IP1	ENSG00000277053	1.8272	1.86708	1.32582e-09	9.85442e-09
RP11-1018N14.1	ENSG00000249383	1.82746	2.24204	1.75589e-07	1.01354e-06
CHN2	ENSG00000106069	1.8278	4.55508	7.01935e-34	2.49987e-32
HPS3	ENSG00000163755	1.82784	8.17196	1.8636e-33	6.41412e-32
ITIH2	ENSG00000151655	1.8287	3.31841	6.19695e-18	9.3706e-17
NUTM2A-AS1	ENSG00000223482	1.82938	4.43867	3.11249e-27	8.08722e-26
RARB	ENSG00000077092	1.82999	3.0975	1.07445e-10	8.97714e-10
BTBD9	ENSG00000183826	1.83238	3.94385	5.12289e-20	8.89898e-19
BAZ2A	ENSG00000076108	1.83804	4.31353	1.69765e-23	3.51101e-22
CMTM4	ENSG00000183723	1.84096	3.46578	6.13095e-13	6.39727e-12
CRHR2	ENSG00000106113	1.84141	3.87392	1.28841e-17	1.91991e-16
RP11-298A10.1	ENSG00000283528	1.84727	2.27551	8.15455e-12	7.60542e-11
GOLGA7B	ENSG00000155265	1.84745	2.12203	5.75154e-09	3.98889e-08
FAM134B	ENSG00000154153	1.84786	3.32586	3.19054e-12	3.08486e-11
GNS	ENSG00000135677	1.84799	2.19339	7.33459e-10	5.58664e-09
LOXL4	ENSG00000138131	1.84835	2.69895	7.01905e-12	6.61325e-11
CPSF3	ENSG00000119203	1.84924	4.00409	2.48718e-22	4.85363e-21
ITGA2	ENSG00000164171	1.85234	3.90179	8.60942e-25	1.98038e-23
RP11-1006G14.2	ENSG00000259783	1.85371	5.11116	1.41916e-27	3.74009e-26
RP11-176D17.3	ENSG00000228470	1.85447	2.07295	7.26038e-10	5.54385e-09
RP11-23D24.2	ENSG00000238755	1.85605	3.24067	8.67429e-15	1.06399e-13
TIMM8B	ENSG00000150779	1.85764	3.24913	6.07688e-14	6.97178e-13
RP11-108P20.2	ENSG00000267501	1.86225	3.07018	1.50222e-13	1.65946e-12
RP11-867G2.8	ENSG00000255929	1.86658	5.89567	7.06591e-53	4.25986e-51
IMPDH1P10	ENSG00000232133	1.86886	6.68372	4.46283e-49	2.47983e-47
ADCY5	ENSG00000173175	1.87073	3.83448	1.67305e-17	2.46128e-16
GALNT11	ENSG00000178234	1.87176	4.55774	5.27433e-24	1.13935e-22
CDC37L1	ENSG00000106993	1.87624	3.38388	4.91649e-17	6.99842e-16
LETM2	ENSG00000165046	1.87714	5.4013	7.41116e-34	2.61918e-32
RP11-197K3.1	ENSG00000242290	1.88351	3.73094	2.3786e-20	4.23556e-19
NECTIN2	ENSG00000130202	1.88557	2.53702	1.65858e-12	1.6643e-11
PISD	ENSG00000241878	1.88659	2.26676	9.07847e-11	7.65446e-10
RP11-426L16.3	ENSG00000225075	1.88779	8.15003	3.04532e-61	2.11203e-59
RFPL3	ENSG00000128276	1.89561	3.19608	1.07277e-14	1.30544e-13
PQLC3	ENSG00000162976	1.90175	3.35184	7.55042e-20	1.29452e-18
CAST	ENSG00000153113	1.9041	8.80257	8.37794e-115	1.28797e-112
GTF2IP4	ENSG00000233369	1.90511	2.07977	4.83292e-09	3.39015e-08
RP11-290L1.2	ENSG00000257839	1.90575	2.5443	4.05227e-09	2.87745e-08
GPRIN2	ENSG00000204175	1.90599	2.10215	1.22127e-12	1.24613e-11
ARMC10	ENSG00000170632	1.90793	2.55807	1.08875e-09	8.16478e-09
TG	ENSG00000042832	1.90932	3.1224	4.43788e-17	6.33668e-16
EHD3	ENSG00000013016	1.91063	1.85034	5.6635e-09	3.93671e-08
TMEM238	ENSG00000233493	1.91092	3.66027	2.48679e-19	4.12556e-18
PAFAH1B3	ENSG00000079462	1.91867	2.68795	1.16415e-14	1.41106e-13
ITGA6	ENSG00000091409	1.91985	4.55785	7.41421e-32	2.39121e-30
CARS2	ENSG00000134905	1.92197	3.15938	1.12429e-11	1.03498e-10
FDPS	ENSG00000160752	1.92238	6.31011	6.99252e-75	5.86355e-73
LTB	ENSG00000227507	1.92541	2.67428	6.03687e-14	6.9345e-13
CROCCP3	ENSG00000080947	1.92596	2.86564	1.30352e-15	1.71033e-14
BNIP3P11	ENSG00000271550	1.92828	7.23683	2.14028e-58	1.42028e-56
MBTD1	ENSG00000011258	1.93057	2.87746	2.17033e-10	1.75078e-09
RSRC1	ENSG00000174891	1.9309	3.2462	8.01201e-20	1.37111e-18
ZFP28	ENSG00000196867	1.93098	2.50538	2.32071e-09	1.6842e-08
RFESD	ENSG00000175449	1.93263	1.9212	6.34218e-10	4.87502e-09
EDC3	ENSG00000179151	1.93455	4.29579	1.29392e-24	2.95424e-23
MFN1	ENSG00000171109	1.9355	2.83249	1.72905e-17	2.53961e-16
MTERF2	ENSG00000120832	1.93575	4.48078	3.17881e-31	9.87251e-30
CLCN2	ENSG00000114859	1.93757	1.71485	2.01905e-09	1.47456e-08
CCDC38	ENSG00000165972	1.93843	2.70141	3.32318e-12	3.20974e-11
SMG6	ENSG00000070366	1.94077	2.08124	4.32318e-10	3.3909e-09
C1orf100	ENSG00000173728	1.94351	2.03845	2.18215e-12	2.15045e-11
C17orf80	ENSG00000141219	1.94726	2.13738	1.18764e-10	9.89596e-10
RTN3	ENSG00000133318	1.95377	2.45148	3.89814e-12	3.73768e-11
TRADD	ENSG00000102871	1.95593	2.9845	1.19851e-15	1.58156e-14
IGF2BP3	ENSG00000136231	1.96037	4.04791	1.53441e-21	2.93032e-20
ALAS2	ENSG00000158578	1.97577	3.30336	2.35337e-20	4.19874e-19
SPX	ENSG00000134548	1.97734	2.8525	2.0873e-07	1.19363e-06
HERC6	ENSG00000138642	1.9779	4.79676	4.38171e-30	1.28308e-28
ASB8	ENSG00000177981	1.97916	3.81918	4.01296e-20	7.01051e-19
SEC24C	ENSG00000176986	1.98079	2.8567	1.33981e-12	1.35806e-11
FHAD1	ENSG00000142621	1.9822	3.45805	3.5679e-20	6.24485e-19
HSD3B7	ENSG00000099377	1.98269	2.54145	4.3255e-14	5.05683e-13
BRAT1	ENSG00000106009	1.98379	3.17161	1.01217e-18	1.61806e-17
ZHX3	ENSG00000174306	1.99394	3.74224	1.20911e-23	2.52327e-22
PDE10A	ENSG00000112541	1.99398	3.46824	7.36148e-23	1.47935e-21
ZNF385C	ENSG00000187595	1.99857	3.6025	1.0332e-16	1.45279e-15
MTSS1	ENSG00000170873	1.99901	5.43268	1.65249e-30	4.94889e-29
TLK1	ENSG00000198586	1.99984	2.14967	1.3692e-07	8.00855e-07
NMNAT2	ENSG00000157064	2.00691	4.39739	5.27494e-13	5.55434e-12
USP47	ENSG00000170242	2.00825	4.33446	3.83355e-31	1.18263e-29
RP11-516J2.1	ENSG00000258402	2.01173	2.77085	2.35025e-14	2.81177e-13
GNA14	ENSG00000156049	2.01206	2.62085	4.92418e-11	4.2769e-10
RP11-973N13.3	ENSG00000259076	2.01218	2.63616	4.35145e-14	5.08073e-13
ARHGAP31	ENSG00000031081	2.01273	5.55712	9.0295e-42	4.14369e-40
TMEM39A	ENSG00000176142	2.01347	2.88952	1.08944e-15	1.44382e-14
SLC7A7	ENSG00000155465	2.01664	3.18525	1.06089e-12	1.09432e-11
APBA2	ENSG00000034053	2.01665	2.16475	1.40191e-10	1.15251e-09
SLC15A3	ENSG00000110446	2.01823	5.6339	8.2224e-38	3.21371e-36
RCN1	ENSG00000049449	2.01997	2.91702	1.04507e-15	1.38702e-14
NAA35	ENSG00000135040	2.02093	3.83313	4.70911e-19	7.64732e-18
IDI1	ENSG00000067064	2.02139	4.74176	7.48032e-24	1.58617e-22
APTR	ENSG00000214293	2.02512	4.20795	1.28267e-32	4.28673e-31
RP11-352D13.6	ENSG00000261634	2.02632	2.13185	9.16555e-12	8.48825e-11
NUTM1	ENSG00000184507	2.02929	4.27448	6.3145e-24	1.34826e-22
SMIM8	ENSG00000111850	2.03907	3.62431	1.14944e-25	2.75389e-24
FZR1	ENSG00000105325	2.04187	4.28328	1.13244e-33	3.94176e-32
PROCA1	ENSG00000167525	2.04422	2.15336	5.75007e-13	6.02027e-12
ZKSCAN4	ENSG00000187626	2.04556	2.20367	5.47644e-11	4.72202e-10
JAZF1	ENSG00000153814	2.04787	5.91868	3.29439e-40	1.42664e-38
SRSF12	ENSG00000154548	2.04793	2.40613	5.95817e-11	5.11715e-10
CTD-2260A17.1	ENSG00000248734	2.04826	6.84145	3.0388e-100	3.78782e-98
MMP25-AS1	ENSG00000261971	2.04936	1.97796	4.4363e-10	3.46783e-09
RP11-64D24.4	ENSG00000256195	2.05763	2.30096	2.08245e-12	2.05879e-11
CAPN2	ENSG00000162909	2.06443	4.364	2.47009e-24	5.46381e-23
RASSF4	ENSG00000107551	2.067	2.94883	5.0065e-20	8.71319e-19
CTU2	ENSG00000174177	2.07065	4.90422	4.45881e-21	8.34241e-20
EMC9	ENSG00000100908	2.07731	4.9444	3.96914e-43	1.86793e-41
PSMD6	ENSG00000163636	2.07897	5.49732	4.41749e-46	2.28915e-44
A1CF	ENSG00000148584	2.0839	2.57152	1.07503e-17	1.60714e-16
HCG4P5	ENSG00000227766	2.08664	7.07632	7.58654e-21	1.39122e-19
CLCN3	ENSG00000109572	2.08987	2.39999	2.58855e-11	2.29584e-10
TK1	ENSG00000167900	2.0933	4.13965	9.21154e-26	2.23011e-24
RP5-1063M23.3	ENSG00000250770	2.09338	3.12433	2.02914e-17	2.9662e-16
TBC1D3P1-DHX40P1	ENSG00000267104	2.09396	3.07988	4.56606e-21	8.52577e-20
PLD5	ENSG00000180287	2.09547	3.94543	4.54118e-30	1.32556e-28
AC113189.5	ENSG00000233223	2.09585	6.75476	5.00322e-56	3.20484e-54
DARS2	ENSG00000117593	2.09587	5.98849	1.16331e-45	5.96132e-44
TAOK1	ENSG00000160551	2.09799	3.38037	2.324e-17	3.36523e-16
CCSAP	ENSG00000154429	2.10154	3.50601	8.50762e-21	1.55395e-19
KDM3A	ENSG00000115548	2.10421	3.87927	2.9064e-26	7.18729e-25
PHF1	ENSG00000112511	2.10476	2.81251	1.0221e-18	1.6283e-17
TCF19	ENSG00000137310	2.10483	6.1263	3.27297e-78	2.98909e-76
HMGCR	ENSG00000113161	2.10586	2.90678	5.23092e-15	6.52027e-14
LINC01314	ENSG00000259417	2.10594	2.73867	2.88554e-11	2.5519e-10
SNF8	ENSG00000159210	2.10849	7.26942	3.48487e-87	3.49396e-85
FGFR1OP2	ENSG00000111790	2.10905	3.4245	1.45984e-20	2.65071e-19
HPS4	ENSG00000100099	2.11175	4.0939	2.64245e-26	6.55215e-25
TRIM31-AS1	ENSG00000231226	2.12609	5.58519	1.68341e-45	8.57888e-44
LRSAM1	ENSG00000148356	2.1292	3.35288	2.66687e-20	4.73062e-19
PSORS1C2	ENSG00000204538	2.13003	4.7861	4.21869e-47	2.22361e-45
LEO1	ENSG00000166477	2.13439	4.72298	7.35201e-32	2.37947e-30
RP11-446H18.5	ENSG00000239828	2.13639	3.4806	1.4592e-23	3.03146e-22
CEP95	ENSG00000258890	2.14576	3.94026	2.3337e-17	3.37399e-16
TMEM243	ENSG00000135185	2.15617	5.52909	3.3402e-45	1.68361e-43
NUMB	ENSG00000133961	2.16128	5.31079	2.38253e-30	7.0664e-29
ANKRD30B	ENSG00000180777	2.16382	2.6578	9.23551e-16	1.23105e-14
ACVR2A	ENSG00000121989	2.17649	4.16441	1.68976e-30	5.04411e-29
INHBA-AS1	ENSG00000224116	2.17716	2.38303	3.96252e-14	4.65609e-13
LINC00854	ENSG00000236383	2.17764	6.82518	2.45037e-98	2.97398e-96
RHOBTB2	ENSG00000008853	2.1807	8.35913	1.11199e-71	8.84223e-70
RP11-290C10.1	ENSG00000255882	2.18297	2.5641	5.5838e-15	6.95074e-14
MTF1	ENSG00000188786	2.18371	4.48186	7.98041e-34	2.80959e-32
LDLRAD4	ENSG00000168675	2.19071	2.24111	5.77695e-12	5.48216e-11
FAAP24	ENSG00000131944	2.19166	2.33601	5.47762e-11	4.72202e-10
JADE1	ENSG00000077684	2.19362	4.04107	1.07344e-23	2.25545e-22
L34079.2	ENSG00000268361	2.21075	2.51395	3.09454e-17	4.45305e-16
TAF12	ENSG00000120656	2.21505	3.4735	1.93789e-20	3.48442e-19
PAPLN	ENSG00000100767	2.22168	4.09246	5.33893e-38	2.11357e-36
ZCCHC14	ENSG00000140948	2.22314	3.33776	2.34181e-25	5.52452e-24
CNOT11	ENSG00000158435	2.22421	5.17462	1.72348e-35	6.35895e-34
ITPR1	ENSG00000150995	2.22623	6.07834	3.38494e-39	1.41921e-37
SPINK4	ENSG00000122711	2.23217	2.74905	6.67721e-14	7.6226e-13
CHST11	ENSG00000171310	2.2343	4.12136	1.06149e-29	3.03134e-28
CTD-2369P2.5	ENSG00000266978	2.23453	7.90332	2.6085e-51	1.54236e-49
R3HCC1	ENSG00000104679	2.2355	6.56926	3.3485e-50	1.90658e-48
CRNKL1	ENSG00000101343	2.23893	3.34546	2.50182e-14	2.9815e-13
ATP4A	ENSG00000105675	2.23898	3.35239	2.23577e-15	2.87225e-14
HEPHL1	ENSG00000181333	2.24224	3.19886	1.3172e-20	2.39641e-19
RNFT1	ENSG00000189050	2.248	3.40422	7.24047e-21	1.3304e-19
C1QTNF1	ENSG00000173918	2.26264	2.70282	1.08311e-16	1.52064e-15
WDR86	ENSG00000187260	2.26268	8.5011	1.36567e-105	1.85249e-103
SNTB1	ENSG00000172164	2.27393	2.74275	4.89216e-16	6.62632e-15
SLC23A1	ENSG00000170482	2.27521	3.48477	1.60996e-20	2.91754e-19
LINC00152	ENSG00000222041	2.27862	5.05021	4.08251e-47	2.1642e-45
RP11-137H2.4	ENSG00000226659	2.28375	4.61149	4.67731e-41	2.06428e-39
TRAPPC2	ENSG00000196459	2.28412	3.47359	2.35602e-19	3.92274e-18
MSTO1	ENSG00000125459	2.28424	3.72719	1.38023e-24	3.13577e-23
TMEM198	ENSG00000188760	2.28523	3.42813	2.53613e-17	3.6552e-16
FAM111B	ENSG00000189057	2.28635	3.02938	1.85495e-13	2.02726e-12
CASQ1	ENSG00000143318	2.29891	2.40872	2.01554e-12	1.99692e-11
ZNF711	ENSG00000147180	2.30006	2.86758	2.59192e-21	4.89914e-20
INVS	ENSG00000119509	2.3083	5.12893	7.54872e-33	2.55053e-31
DACT3-AS1	ENSG00000245598	2.31004	6.81231	5.70641e-92	6.12046e-90
TBC1D16	ENSG00000167291	2.31325	2.00205	1.23076e-11	1.12848e-10
FHL2	ENSG00000115641	2.31394	3.12547	3.92572e-16	5.34872e-15
MAPK8IP3	ENSG00000138834	2.31458	2.21969	4.63036e-18	7.08299e-17
KIAA1549L	ENSG00000110427	2.32068	2.88349	1.49711e-17	2.21304e-16
TAF11	ENSG00000064995	2.32396	2.99331	5.01056e-25	1.16417e-23
ERI3	ENSG00000117419	2.32452	3.00781	1.21152e-15	1.59643e-14
UBE2N	ENSG00000177889	2.32688	3.60397	6.62798e-24	1.40867e-22
KANTR	ENSG00000232593	2.33008	3.29158	3.61641e-27	9.34392e-26
KLF9	ENSG00000119138	2.33376	3.83369	1.43074e-31	4.50415e-30
CLOCK	ENSG00000134852	2.33497	5.63805	5.91301e-58	3.89583e-56
SH3PXD2A	ENSG00000107957	2.3357	3.0895	2.48806e-27	6.51985e-26
ZNF219	ENSG00000165804	2.33947	5.69963	4.63159e-60	3.16457e-58
GPR161	ENSG00000143147	2.33994	3.69626	8.32009e-29	2.31158e-27
KCNT1	ENSG00000107147	2.34129	2.63668	2.50009e-19	4.14018e-18
ZNF692	ENSG00000171163	2.3434	2.82916	2.93065e-15	3.73891e-14
ITSN1	ENSG00000205726	2.34766	3.21885	6.59467e-20	1.137e-18
KDELR3	ENSG00000100196	2.3496	3.45869	1.65863e-20	2.99985e-19
CTD-2047H16.5	ENSG00000276863	2.35308	7.46172	7.60259e-85	7.46025e-83
PPM1H	ENSG00000111110	2.36148	3.30694	5.28827e-30	1.53877e-28
CCDC181	ENSG00000117477	2.36431	4.60632	7.30864e-54	4.52449e-52
DNAH12	ENSG00000174844	2.36977	3.12941	7.56971e-16	1.01487e-14
CACNG8	ENSG00000142408	2.38087	4.82601	8.64508e-48	4.66329e-46
TCF7L1	ENSG00000152284	2.38851	4.44746	2.46571e-41	1.10406e-39
PLAC9	ENSG00000189129	2.39145	2.87887	2.77784e-20	4.918e-19
IFT172	ENSG00000138002	2.39337	4.4245	3.25238e-30	9.55414e-29
SHMT1	ENSG00000176974	2.39508	3.4805	1.56516e-26	3.91247e-25
SGCE	ENSG00000127990	2.39508	3.30244	5.72231e-25	1.32287e-23
PAPSS2	ENSG00000198682	2.41033	4.14757	1.51816e-35	5.6239e-34
ANKZF1	ENSG00000163516	2.41177	3.54722	5.2184e-25	1.20941e-23
ADCY10	ENSG00000143199	2.41368	3.58845	7.4572e-26	1.81014e-24
VPS13B	ENSG00000132549	2.41432	4.54482	4.58099e-36	1.71769e-34
NEXN	ENSG00000162614	2.42359	2.95993	2.15177e-13	2.34055e-12
HSPB9	ENSG00000260325	2.42487	2.06269	2.11277e-17	3.07385e-16
RP11-599J14.2	ENSG00000256673	2.43281	2.26161	2.35798e-13	2.55882e-12
RALGPS2	ENSG00000116191	2.44125	4.47778	2.81705e-53	1.70951e-51
NFE2L3	ENSG00000050344	2.44431	8.82739	1.29125e-87	1.30884e-85
SMYD2	ENSG00000143499	2.44434	2.56607	5.14276e-16	6.95555e-15
SSBP3	ENSG00000157216	2.4483	2.88852	3.50866e-18	5.43018e-17
COQ8A	ENSG00000163050	2.44909	2.69443	4.46282e-17	6.36245e-16
HBG2	ENSG00000196565	2.45426	8.07524	9.84111e-171	2.32755e-168
RP11-386G11.3	ENSG00000258283	2.47735	2.30833	1.63419e-19	2.75572e-18
KLB	ENSG00000134962	2.47868	2.58849	9.54958e-18	1.43228e-16
RAD52	ENSG00000002016	2.48446	3.85308	2.07274e-27	5.447e-26
RMDN2	ENSG00000115841	2.48748	4.75183	2.35314e-34	8.54541e-33
AP001189.4	ENSG00000236304	2.48937	2.96237	4.07586e-23	8.2628e-22
GYS2	ENSG00000111713	2.4917	3.07461	2.16596e-15	2.78882e-14
PDSS1	ENSG00000148459	2.49187	2.804	6.61006e-22	1.27023e-20
SGCG	ENSG00000102683	2.49324	2.97769	3.47804e-24	7.60223e-23
SCAP	ENSG00000114650	2.49869	3.00444	1.07939e-22	2.15504e-21
MTMR9LP	ENSG00000220785	2.50422	4.3849	2.14634e-41	9.65746e-40
AC005324.6	ENSG00000233002	2.50633	2.77077	5.31718e-24	1.14593e-22
SQLE	ENSG00000104549	2.51057	3.56843	2.52562e-19	4.17497e-18
GRIP1	ENSG00000155974	2.51292	3.76077	8.17682e-32	2.60979e-30
PLEKHG2	ENSG00000090924	2.51812	2.64688	9.31284e-19	1.49394e-17
RP11-54O7.11	ENSG00000224969	2.51927	3.68415	7.66621e-30	2.20978e-28
BICDL2	ENSG00000162069	2.52118	2.88097	2.2805e-19	3.80386e-18
FKBP9	ENSG00000122642	2.52671	4.81909	2.39658e-54	1.50381e-52
AC007899.3	ENSG00000224891	2.52989	5.8401	3.49166e-76	3.01001e-74
FER1L4	ENSG00000088340	2.53663	3.61528	5.54769e-24	1.19004e-22
TMEM92-AS1	ENSG00000251179	2.53915	5.65918	4.24502e-68	3.15775e-66
RP11-670E13.5	ENSG00000262112	2.54068	10.0394	8.66308e-209	2.49713e-206
CTD-2047H16.4	ENSG00000263069	2.54662	13.3182	1.61113e-181	4.0165e-179
DDX43	ENSG00000080007	2.55455	2.4712	1.44432e-17	2.14531e-16
KIAA0895L	ENSG00000196123	2.55531	5.24687	5.33006e-62	3.75301e-60
HIF1A	ENSG00000100644	2.55691	4.68386	2.62864e-53	1.60573e-51
HMBOX1	ENSG00000147421	2.56318	3.00583	3.07632e-19	5.03121e-18
GPR160	ENSG00000173890	2.56438	4.09842	2.98424e-27	7.77589e-26
COL17A1	ENSG00000065618	2.5663	2.18495	2.09862e-17	3.05809e-16
FAM150B	ENSG00000189292	2.56954	2.44859	5.39151e-21	9.96619e-20
RP11-618G20.1	ENSG00000258964	2.57206	2.856	1.01846e-18	1.62531e-17
ADAM22	ENSG00000008277	2.57407	3.15095	1.23594e-18	1.94545e-17
RP11-347C12.12	ENSG00000273724	2.57443	3.74438	1.76735e-33	6.10565e-32
PLA2G4C-AS1	ENSG00000269420	2.57721	3.90919	6.26447e-32	2.04182e-30
DNAH7	ENSG00000118997	2.58131	4.64991	3.20255e-47	1.70754e-45
FCGR1A	ENSG00000150337	2.58413	3.01203	2.53902e-28	6.94954e-27
PPP2R2D	ENSG00000175470	2.58692	3.54322	1.33399e-30	4.03433e-29
RP11-23P13.6	ENSG00000174171	2.59232	5.46158	7.5248e-71	5.93237e-69
CTD-2587H24.10	ENSG00000267649	2.59789	3.19449	6.12312e-24	1.31043e-22
OTUB2	ENSG00000089723	2.59851	3.15268	1.85143e-19	3.10502e-18
PSKH1	ENSG00000159792	2.60045	3.39055	1.33617e-24	3.04316e-23
RP11-54O7.10	ENSG00000231702	2.60568	2.68177	3.28078e-20	5.75321e-19
MIR4496	ENSG00000257221	2.60703	3.58116	1.02175e-25	2.46717e-24
PGAM5	ENSG00000247077	2.61586	2.73754	5.81048e-22	1.12125e-20
TOR3A	ENSG00000186283	2.62136	5.5815	3.70984e-61	2.5537e-59
GPR68	ENSG00000119714	2.62674	4.71786	1.19558e-52	7.16103e-51
MOCS2	ENSG00000164172	2.62678	4.20995	1.76035e-31	5.50423e-30
RHOC	ENSG00000155366	2.62969	6.72788	3.24177e-96	3.8336e-94
NFE2L2	ENSG00000116044	2.63103	3.47442	3.48888e-23	7.11979e-22
CACNB3	ENSG00000167535	2.6389	2.72865	3.73143e-26	9.20287e-25
SAMD4A	ENSG00000020577	2.63897	2.90838	1.04422e-19	1.78039e-18
BID	ENSG00000015475	2.6452	4.26048	2.58311e-53	1.58844e-51
TRAF3	ENSG00000131323	2.64592	3.73616	3.56424e-33	1.21316e-31
DTX3L	ENSG00000163840	2.64736	3.32322	5.86929e-30	1.70246e-28
AK8	ENSG00000165695	2.65722	2.97124	2.02283e-24	4.52878e-23
ZNF335	ENSG00000198026	2.66645	3.24484	2.26129e-26	5.62214e-25
NCOA7	ENSG00000111912	2.67524	3.01867	2.8928e-25	6.78962e-24
RP11-405F3.4	ENSG00000260467	2.6811	3.63757	2.4829e-28	6.81616e-27
SUN2	ENSG00000100242	2.68366	8.54839	1.47762e-174	3.58672e-172
GBP7	ENSG00000213512	2.70228	3.70067	2.72466e-40	1.18549e-38
CTD-2260A17.2	ENSG00000247121	2.70498	7.82627	5.89727e-167	1.32674e-164
LINC01270	ENSG00000203999	2.709	5.1494	3.99463e-51	2.34691e-49
BOLL	ENSG00000152430	2.71299	3.97165	2.80046e-48	1.5195e-46
HCG4P7	ENSG00000230521	2.72146	3.14814	1.8488e-12	1.8456e-11
DNMBP	ENSG00000107554	2.73674	3.59531	1.42824e-35	5.31213e-34
STK32C	ENSG00000165752	2.74002	5.35626	1.72276e-57	1.127e-55
TTC33	ENSG00000113638	2.7468	5.85011	4.50374e-87	4.46693e-85
SLC10A1	ENSG00000100652	2.74832	3.37783	1.78332e-26	4.44578e-25
MCPH1	ENSG00000147316	2.76948	3.83118	2.08399e-41	9.4229e-40
FAM63B	ENSG00000128923	2.77595	2.59092	6.45084e-22	1.24222e-20
WDR48	ENSG00000114742	2.7778	3.28226	8.06501e-39	3.32106e-37
AC074011.2	ENSG00000230730	2.78217	2.82517	4.22381e-23	8.52527e-22
ANKDD1B	ENSG00000189045	2.78862	4.61748	2.51404e-32	8.34154e-31
RP11-356I2.4	ENSG00000237499	2.80234	3.96676	2.97202e-37	1.13281e-35
PHRF1	ENSG00000070047	2.81738	4.11656	1.54323e-54	9.74983e-53
TTC23	ENSG00000103852	2.82474	5.61982	3.37132e-62	2.39208e-60
DIAPH2	ENSG00000147202	2.85935	3.26232	2.79064e-37	1.06809e-35
LINC00954	ENSG00000228784	2.86564	2.62564	2.43771e-25	5.73608e-24
ACOT13	ENSG00000112304	2.87558	7.26596	9.96129e-116	1.61198e-113
FMNL2	ENSG00000157827	2.87586	6.39197	4.11329e-76	3.51306e-74
OSBPL2	ENSG00000130703	2.87691	3.42292	2.08195e-38	8.34954e-37
CTA-384D8.36	ENSG00000272821	2.89557	6.62822	4.60145e-69	3.479e-67
TMCC2	ENSG00000133069	2.91123	2.51723	1.4491e-24	3.2681e-23
SYBU	ENSG00000147642	2.92293	2.52867	1.04663e-26	2.63774e-25
ADA	ENSG00000196839	2.92881	2.9116	5.66554e-27	1.45568e-25
RP11-473M20.9	ENSG00000262370	2.93179	2.7847	1.50586e-24	3.37957e-23
UBAP2	ENSG00000137073	2.93602	3.70368	5.4885e-26	1.34643e-24
PTPRN2	ENSG00000155093	2.9364	5.48946	2.09584e-78	1.93321e-76
RP3-436N22.3	ENSG00000238272	2.94555	2.46898	7.18514e-28	1.92662e-26
SHISA5	ENSG00000164054	2.95535	2.7063	5.29147e-28	1.42715e-26
GNG12	ENSG00000172380	2.96049	2.99601	1.9334e-28	5.32347e-27
CA14	ENSG00000118298	2.96161	4.14405	4.63909e-41	2.05726e-39
DOCK5	ENSG00000147459	2.98122	4.10407	1.90024e-41	8.6344e-40
NAV2	ENSG00000166833	2.98943	3.07995	8.38053e-27	2.12606e-25
RADIL	ENSG00000157927	2.99143	2.43404	6.10318e-26	1.49326e-24
TRAPPC3L	ENSG00000173626	2.99441	4.39128	7.29093e-60	4.94497e-58
DAGLB	ENSG00000164535	3.00774	5.35698	2.87861e-67	2.10732e-65
REC114	ENSG00000183324	3.01718	4.66219	2.35513e-40	1.02956e-38
RP11-255G12.2	ENSG00000258942	3.02963	4.09516	2.33822e-38	9.33669e-37
DSTN	ENSG00000125868	3.03419	4.45307	1.40363e-30	4.23108e-29
USP42	ENSG00000106346	3.03832	2.75531	4.09719e-21	7.6814e-20
RP11-536G4.1	ENSG00000258292	3.04403	3.88141	8.70731e-37	3.27821e-35
U91328.21	ENSG00000272558	3.07107	8.31539	2.19734e-254	8.10731e-252
CCDC85B	ENSG00000175602	3.07291	3.91237	3.12978e-33	1.06922e-31
CCDC167	ENSG00000198937	3.12095	3.50375	9.26412e-44	4.50846e-42
NSD1	ENSG00000165671	3.13724	3.49177	2.35639e-29	6.68779e-28
EIF2D	ENSG00000143486	3.14144	6.10538	3.78325e-103	4.84677e-101
EPB41L5	ENSG00000115109	3.14449	2.71373	7.47393e-32	2.40208e-30
SGMS1	ENSG00000198964	3.15391	3.02823	8.3899e-27	2.12606e-25
RP11-495P10.1	ENSG00000231551	3.16422	7.06392	7.60115e-153	1.5242e-150
RP11-234B24.2	ENSG00000255474	3.16866	3.16677	1.17292e-27	3.09999e-26
NAB2	ENSG00000166886	3.17297	5.33472	2.35769e-106	3.24588e-104
DOK1	ENSG00000115325	3.18178	2.49716	1.71206e-25	4.08063e-24
VSNL1	ENSG00000163032	3.18505	4.60887	4.87899e-54	3.04079e-52
SIGLEC16	ENSG00000161643	3.1874	3.58357	6.87287e-49	3.79613e-47
RP11-519G16.5	ENSG00000259342	3.19144	8.00017	2.62903e-220	8.08338e-218
PRSS23	ENSG00000150687	3.21587	7.58995	7.29818e-127	1.27016e-124
JADE2	ENSG00000043143	3.22565	3.91247	3.31493e-50	1.89918e-48
TMEM181	ENSG00000146433	3.25178	4.47858	1.31992e-58	8.88685e-57
MAPK15	ENSG00000181085	3.25673	4.48544	1.26774e-76	1.11368e-74
BICDL1	ENSG00000135127	3.25843	3.5401	1.102e-38	4.47789e-37
C19orf70	ENSG00000174917	3.26006	2.88502	8.76211e-33	2.9497e-31
APPL2	ENSG00000136044	3.26868	6.62257	2.81982e-113	4.26394e-111
TSFM	ENSG00000123297	3.27295	6.53811	5.67597e-93	6.15943e-91
PCSK5	ENSG00000099139	3.28216	3.2219	2.56854e-34	9.29107e-33
EHBP1L1	ENSG00000173442	3.29269	3.68023	3.26088e-29	9.19827e-28
UNK	ENSG00000132478	3.31701	3.26546	2.63541e-37	1.01287e-35
RP11-439H13.2	ENSG00000256199	3.31717	4.32762	1.49592e-62	1.06964e-60
CACFD1	ENSG00000160325	3.32059	4.63989	3.10703e-70	2.40834e-68
PARP9	ENSG00000138496	3.32636	5.74616	2.13319e-104	2.81093e-102
RP11-148B18.1	ENSG00000226835	3.34136	3.52565	5.72522e-45	2.87008e-43
LIPE-AS1	ENSG00000213904	3.34245	9.29072	4.25427e-298	1.7837e-295
RDH12	ENSG00000139988	3.3639	2.98303	8.27288e-35	3.02814e-33
RP11-638I2.8	ENSG00000258666	3.37177	11.4972	2.03106e-196	5.51014e-194
RP11-455F5.3	ENSG00000250616	3.37413	3.72368	1.44768e-24	3.2681e-23
PARD3	ENSG00000148498	3.3808	4.38669	2.63472e-63	1.89865e-61
RUFY1	ENSG00000176783	3.38371	5.20166	7.46171e-79	7.02314e-77
COX7A2L	ENSG00000115944	3.39263	3.24243	1.02282e-29	2.92998e-28
LINC01378	ENSG00000236922	3.40611	6.40132	5.34867e-157	1.09636e-154
SLC30A4	ENSG00000104154	3.42865	4.97595	3.06748e-93	3.36838e-91
MFSD4A	ENSG00000174514	3.43231	6.1931	1.1948e-115	1.90015e-113
PEAR1	ENSG00000187800	3.43284	3.68867	5.76576e-50	3.24289e-48
RP5-1029K10.2	ENSG00000249906	3.4713	5.51628	5.53502e-107	7.73561e-105
MAPT	ENSG00000186868	3.47156	4.29266	9.28673e-44	4.50846e-42
XXbac-BPG248L24.12	ENSG00000271581	3.47468	4.96724	3.10462e-19	5.0685e-18
PANDAR	ENSG00000281450	3.48014	6.27316	4.65336e-120	7.80411e-118
DDX27	ENSG00000124228	3.48154	4.66568	1.56373e-77	1.41411e-75
C12orf73	ENSG00000204954	3.48432	4.57723	1.135e-81	1.09054e-79
CTD-2240E14.4	ENSG00000267387	3.48619	6.61228	4.8608e-115	7.59933e-113
FAM65C	ENSG00000042062	3.50306	3.68082	1.14139e-31	3.60553e-30
TMEM52B	ENSG00000165685	3.53125	3.71453	2.68101e-41	1.19467e-39
RP11-439L18.2	ENSG00000224460	3.53463	4.20436	4.12283e-57	2.6781e-55
TXLNG	ENSG00000086712	3.54221	5.41808	1.63139e-80	1.55134e-78
INSL6	ENSG00000120210	3.547	5.15751	1.02719e-76	9.19888e-75
AC006160.5	ENSG00000249502	3.57125	10.0049	4.92287009516218e-320	2.52269721140282e-317
NANS	ENSG00000095380	3.57965	7.13699	1.85165e-193	4.87988e-191
TAF15	ENSG00000270647	3.59068	8.26506	8.7551e-124	1.4955e-121
ANGPTL6	ENSG00000130812	3.61806	8.45789	1.97626258336499e-323	1.0721224514755e-320
AC010149.4	ENSG00000235419	3.65897	9.81686	0	0
SLC46A3	ENSG00000139508	3.66023	3.53043	4.87091e-43	2.28067e-41
GPX3	ENSG00000211445	3.66253	7.25445	4.22257e-99	5.1932e-97
GIGYF1	ENSG00000146830	3.7038	4.19033	1.72403e-51	1.02597e-49
RICTOR	ENSG00000164327	3.71609	4.46707	2.55894e-67	1.8883e-65
VEPH1	ENSG00000197415	3.72274	5.06268	5.52395e-104	7.17646e-102
DXO	ENSG00000204348	3.77033	7.35676	3.14446e-197	8.78924e-195
VAMP1	ENSG00000139190	3.77326	4.933	7.45083e-113	1.10849e-110
NIM1K	ENSG00000177453	3.79623	3.58399	4.30896e-47	2.25829e-45
ULK4	ENSG00000168038	3.81718	4.26226	3.30298e-75	2.79511e-73
SP140	ENSG00000079263	3.81744	8.23246	0	0
TAP1	ENSG00000168394	3.83359	5.42248	2.40743e-108	3.41633e-106
PRICKLE1	ENSG00000139174	3.85749	4.48336	1.76213e-72	1.45124e-70
SERPINE2	ENSG00000135919	3.86344	3.30078	1.81969e-45	9.22243e-44
GLS	ENSG00000115419	3.86639	8.13763	2.21216e-275	8.87174e-273
NEK6	ENSG00000119408	3.88654	3.75199	9.77337e-41	4.29284e-39
TLDC2	ENSG00000101342	3.88954	9.36223	2.02982e-300	8.91572e-298
RP1-102K2.6	ENSG00000232530	3.89006	3.32422	2.36617e-42	1.09676e-40
AC116366.6	ENSG00000234290	3.89329	6.00569	1.00579e-159	2.1085e-157
POLDIP2	ENSG00000004142	3.92639	5.38348	4.74394e-69	3.55757e-67
SCG3	ENSG00000104112	3.94267	4.2069	1.81564e-44	9.00403e-43
GPATCH11	ENSG00000152133	3.94851	5.99088	4.32832e-139	7.82832e-137
RP11-525K10.1	ENSG00000260706	3.94982	3.07828	8.17432e-38	3.20851e-36
AC073072.5	ENSG00000179428	3.95557	6.7934	2.79677e-183	7.16595e-181
ARHGEF33	ENSG00000214694	3.96255	3.91862	8.77138e-51	5.0885e-49
TMEM164	ENSG00000157600	3.96563	3.91417	3.22992e-34	1.16378e-32
CAMK4	ENSG00000152495	3.97638	3.78123	2.50646e-61	1.75149e-59
KATNB1	ENSG00000140854	4.00256	3.92356	1.1908e-69	9.07764e-68
AAGAB	ENSG00000103591	4.01706	3.44318	1.21291e-39	5.1557e-38
HOMER2	ENSG00000103942	4.02409	4.2843	2.91813e-64	2.11944e-62
IMMP2L	ENSG00000184903	4.04581	4.47253	6.4982e-72	5.21212e-70
AC004448.5	ENSG00000235979	4.08776	4.75948	6.56829e-95	7.29951e-93
TUBA8	ENSG00000183785	4.09439	4.30173	5.00282e-89	5.18495e-87
PPP1R9A	ENSG00000158528	4.09897	3.651	4.34175e-70	3.33736e-68
USP30	ENSG00000135093	4.10392	4.32861	2.79261e-95	3.21988e-93
RP11-467K18.2	ENSG00000253973	4.11412	5.53592	3.75346e-90	3.97954e-88
AC005682.6	ENSG00000226329	4.12047	5.42128	8.86676e-112	1.29821e-109
C5orf56	ENSG00000197536	4.12199	5.3308	4.36856e-146	8.22358e-144
VAT1	ENSG00000108828	4.12647	4.18107	5.31767e-95	5.98173e-93
RP11-322D14.2	ENSG00000260145	4.13243	6.69666	9.16904e-225	2.91639e-222
KCTD18	ENSG00000155729	4.13971	4.54741	7.78238e-46	4.01032e-44
AC020594.5	ENSG00000237133	4.17848	6.55228	5.15253e-217	1.53313e-214
ADAMTSL4	ENSG00000143382	4.19257	5.74683	1.04328e-146	2.00484e-144
CTD-3088G3.8	ENSG00000188897	4.19809	4.3688	1.23772e-76	1.09776e-74
C7orf49	ENSG00000122783	4.20546	8.19034	3.31603e-250	1.13285e-247
PGAP2	ENSG00000148985	4.22391	4.10086	1.06813e-83	1.03709e-81
TRIM41	ENSG00000146063	4.25465	5.0704	5.0027e-74	4.1572e-72
PSMB9	ENSG00000240065	4.27513	10.8358	1.10511262908752e-310	5.09677944535164e-308
AFAP1	ENSG00000196526	4.2834	5.47246	1.96757e-161	4.32115e-159
CTD-2369P2.8	ENSG00000267607	4.31369	7.41065	6.08208e-160	1.30468e-157
TBC1D17	ENSG00000104946	4.32387	5.70394	1.03425e-170	2.38498e-168
RP1-71H24.1	ENSG00000257452	4.33999	13.4056	0	0
ABI3BP	ENSG00000154175	4.34201	4.60016	2.56656e-70	2.00627e-68
RP11-685M7.3	ENSG00000246308	4.34957	4.14527	2.92322e-89	3.06407e-87
FAM228A	ENSG00000186453	4.38437	4.53549	2.30997e-72	1.86905e-70
DHRS12	ENSG00000102796	4.40679	4.3782	1.46875e-58	9.81724e-57
SORCS2	ENSG00000184985	4.52232	6.3117	1.4926e-141	2.75354e-139
AC013463.2	ENSG00000236283	4.62637	5.69785	3.76414e-95	4.28648e-93
TBXAS1	ENSG00000059377	4.63119	5.79998	1.13831e-108	1.6406e-106
PPT1	ENSG00000131238	4.66917	4.62191	1.03879e-78	9.67856e-77
MXI1	ENSG00000119950	4.70519	4.41535	2.1561e-72	1.75999e-70
KCNB1	ENSG00000158445	4.72119	5.69829	6.59766e-118	1.08673e-115
C6orf25	ENSG00000204420	4.81801	5.37932	4.38297e-98	5.25046e-96
AC009950.2	ENSG00000225963	4.82464	8.87712	0	0
TBC1D20	ENSG00000125875	4.82622	4.0919	9.15551e-89	9.38338e-87
SURF1	ENSG00000148290	4.8277	4.96869	7.24594e-96	8.46032e-94
HCG4P11	ENSG00000225864	4.93443	5.058	1.64061e-32	5.46316e-31
TMC1	ENSG00000165091	5.00095	5.38185	1.01228e-129	1.79562e-127
RP11-326C3.11	ENSG00000251661	5.14216	8.03806	3.30163e-148	6.47962e-146
RP1-197B17.3	ENSG00000257433	5.18752	5.61065	2.9722e-101	3.75555e-99
HLA-F-AS1	ENSG00000214922	5.54038	6.05103	1.25305e-270	4.81591e-268
ANXA10	ENSG00000109511	5.62593	7.09118	4.74366866535927e-312	2.302926303646e-309
HDAC1	ENSG00000116478	5.67234	6.18814	2.22773e-105	2.97805e-103
IL23A	ENSG00000110944	5.86616	5.98445	1.19138e-228	3.92474e-226
CETP	ENSG00000087237	6.13774	6.08539	4.34945e-252	1.54305e-249
TRIM5	ENSG00000132256	6.18281	10.2892	0	0
NELFE	ENSG00000204356	6.2625	7.19	0	0
SMTNL1	ENSG00000214872	6.74923	8.53238	0	0
ACO1	ENSG00000122729	6.80262	10.2847	0	0
VPS37B	ENSG00000139722	7.66494	7.58544	0	0
RP11-288L9.4	ENSG00000225886	7.7153	8.14235	0	0
LIPA	ENSG00000107798	8.53285	14.3005	0	0
ART3	ENSG00000156219	9.14413	9.20625	0	0
AP001610.5	ENSG00000228318	9.3174	10.4508	0	0
RP11-44K6.3	ENSG00000253939	9.57752	9.0267	0	0
AC015849.2	ENSG00000270240	9.90157	11.7355	0	0
RP11-609D21.3	ENSG00000279296	10.1452	9.89587	0	0

## Sheet: ddxKO_ctrl
Genename	Ensembl_ID	logFC	logCPM	PValue	FDR
NYAP2	ENSG00000144460	-1.43313	2.33093	0.014621	0.0492842
RRP36	ENSG00000124541	1.01792	1.6879	0.0135093	0.0462982
RGS3	ENSG00000138835	-1.64077	1.59636	0.0134365	0.0461023
PLD5	ENSG00000180287	-1.40542	2.72587	0.0131843	0.0454029
TMEM190	ENSG00000160472	1.03885	2.48899	0.0131551	0.0453856
CAMTA1	ENSG00000171735	-1.42689	3.5742	0.0131546	0.0453856
MAPKAP1	ENSG00000119487	-1.17687	2.3836	0.0130927	0.04522
PCSK5	ENSG00000099139	1.45452	3.98302	0.0126743	0.0439852
SUN1	ENSG00000164828	1.03069	2.16107	0.0126242	0.043844
KHDRBS3	ENSG00000131773	-1.10519	2.15289	0.012537	0.0436216
TMEM192	ENSG00000170088	-1.38573	1.72787	0.0122793	0.042916
HMCN1	ENSG00000143341	-1.57672	2.5475	0.0122264	0.0427787
SNX29	ENSG00000048471	-1.95093	2.5535	0.0121841	0.0426945
RP11-191G24.1	ENSG00000227070	-1.09531	1.46349	0.0120443	0.0422835
ALPK1	ENSG00000073331	-1.3472	1.84595	0.0119946	0.0421406
CTC-498M16.2	ENSG00000250156	1.00402	1.6625	0.0119767	0.0420934
STON2	ENSG00000140022	-1.34006	1.53917	0.0116267	0.0410785
TMEM115	ENSG00000126062	1.09447	2.67854	0.0115838	0.0409422
CTD-2015H6.3	ENSG00000249042	1.03319	2.23765	0.0114223	0.0404626
RP11-446H18.5	ENSG00000239828	1.17128	2.74483	0.0113375	0.040208
SPOCK3	ENSG00000196104	-1.78082	2.35268	0.0112461	0.0399441
SPATA2L	ENSG00000158792	1.08474	1.51867	0.0110103	0.03927
RP11-288L9.4	ENSG00000225886	-1.03876	1.58055	0.0109705	0.039143
DNAH2	ENSG00000183914	1.18704	1.9954	0.0107363	0.0385269
TRPC5	ENSG00000072315	1.3287	2.73556	0.0104379	0.03773
NFIA	ENSG00000162599	-1.2375	2.86429	0.0102323	0.0370868
RP11-348J24.2	ENSG00000250049	-1.43118	2.48778	0.00980242	0.0357771
ADORA2B	ENSG00000170425	1.06557	1.98281	0.00948852	0.0348618
ROPN1B	ENSG00000114547	1.03523	2.11377	0.00945507	0.0347777
AC005775.2	ENSG00000266933	1.01076	2.35849	0.00939768	0.0346772
STK3	ENSG00000104375	-1.5236	3.01903	0.0091652	0.033886
VTI1A	ENSG00000151532	-1.63619	1.84031	0.00915527	0.0338626
ZBED3-AS1	ENSG00000250802	-1.37274	1.58738	0.00907661	0.0336246
TRIB3	ENSG00000101255	1.04191	1.57742	0.00906254	0.033599
IMMP2L	ENSG00000184903	-1.81943	3.1133	0.00905861	0.0335977
EGLN3	ENSG00000129521	-1.6892	2.63253	0.00889296	0.0330617
CTD-2012K14.6	ENSG00000261386	1.06741	1.959	0.00869908	0.0324953
MYO5B	ENSG00000167306	-1.51322	2.29135	0.00866125	0.0323797
KIAA0825	ENSG00000185261	-1.37596	2.39898	0.00859512	0.0321581
LPP	ENSG00000145012	-1.48923	3.08448	0.00858614	0.0321373
LYPD6B	ENSG00000150556	-1.13176	2.73627	0.00829434	0.0311693
ZNF43	ENSG00000198521	-1.24043	1.5129	0.00824684	0.0310405
LRCH3	ENSG00000186001	-1.05021	2.00292	0.00824656	0.0310405
DST	ENSG00000151914	-1.19019	2.96785	0.00815076	0.0307332
RP11-452L6.5	ENSG00000260267	1.23244	1.97944	0.00808864	0.0305307
NEO1	ENSG00000067141	-1.71302	1.96525	0.00802671	0.0303213
PGM5P4	ENSG00000225398	1.08858	2.23044	0.00787914	0.0298359
STX8	ENSG00000170310	-1.50219	1.82986	0.00775008	0.0293827
SEC24C	ENSG00000176986	1.06316	2.11778	0.00772897	0.0293382
MAGI2	ENSG00000187391	-2.05338	3.52126	0.00765201	0.0291097					MAGI2	-2.05338
LA16c-312E8.4	ENSG00000279930	1.07863	2.1204	0.00757739	0.0288678
LINC00705	ENSG00000225269	-1.037	1.79914	0.00746285	0.0284893
CTC-359M8.1	ENSG00000250025	1.24327	2.06188	0.00742167	0.0283667
JARID2	ENSG00000008083	1.4	3.14167	0.00723349	0.0277377
ARHGEF16	ENSG00000130762	1.3256	1.49578	0.00702178	0.0270585
SART1	ENSG00000175467	1.08554	1.66496	0.00700662	0.0270333
SGCD	ENSG00000170624	-1.77594	3.24538	0.0069901	0.0269807
ZFAND5	ENSG00000107372	-1.11724	1.34392	0.0069128	0.0267272
TUFM	ENSG00000178952	1.02467	1.85311	0.00689875	0.0266939
ARID1B	ENSG00000049618	-1.65133	2.08818	0.00679345	0.0263625
ENPEP	ENSG00000138792	-1.46757	2.02308	0.00677424	0.0263206
MAN2A2	ENSG00000196547	1.06446	1.61434	0.00672866	0.0261543
PKDREJ	ENSG00000130943	1.0807	1.84001	0.00668613	0.0260023
ARHGAP40	ENSG00000124143	-1.02147	2.24015	0.00663379	0.0258283
DRAM1	ENSG00000136048	1.31732	2.538	0.00660733	0.0257467
LINC00534	ENSG00000253394	1.26626	3.78075	0.00649123	0.0253519
SGCZ	ENSG00000185053	-1.54134	3.74858	0.00646353	0.0252807
MINK1	ENSG00000141503	1.06257	2.01116	0.00627518	0.0246261
ANTXR1	ENSG00000169604	1.03742	3.23264	0.00626838	0.0246097
ACSM4	ENSG00000215009	1.04751	2.26996	0.0062189	0.0244563
SLIT3	ENSG00000184347	-2.28253	2.6331	0.00618937	0.0243504					SLIT3	-2.28253
EXOC6B	ENSG00000144036	-1.85174	2.81077	0.00613646	0.0241625
RP11-395C3.1	ENSG00000230929	1.0049	1.87512	0.00610411	0.0240452
CCNI	ENSG00000118816	1.06591	1.97055	0.00604754	0.0238824
RP11-316M21.7	ENSG00000236308	1.24084	1.82611	0.00600649	0.0237603
RNF144A	ENSG00000151692	-1.42597	1.695	0.0059948	0.0237241
HECW2	ENSG00000138411	-1.10119	3.01468	0.00590073	0.0233813
CADPS2	ENSG00000081803	-1.1863	3.08526	0.00578298	0.0229924
TENM2	ENSG00000145934	-1.0413	4.33422	0.00576119	0.0229252
CCDC92	ENSG00000119242	1.16218	2.23166	0.00572542	0.0228187
SNRNP200	ENSG00000144028	1.09988	2.59471	0.00562849	0.0225116
RP11-863P13.4	ENSG00000205037	1.1971	2.20844	0.00555598	0.022269
CHRDL2	ENSG00000054938	1.06463	2.24722	0.00553481	0.0221936
WDCP	ENSG00000163026	1.08423	1.9845	0.00538091	0.0217342
CD99L2	ENSG00000102181	1.21654	1.6162	0.00537351	0.0217137
KBTBD11-OT1	ENSG00000253696	-1.0049	2.26971	0.00536789	0.0217097
CYB5R2	ENSG00000166394	1.06812	2.89865	0.00536086	0.0216999
FYN	ENSG00000010810	-1.43631	1.87942	0.00534142	0.0216399
TMED5	ENSG00000117500	1.0385	2.60733	0.00528693	0.0214469
RP11-184M15.2	ENSG00000248802	1.19067	2.01627	0.00527206	0.0214051
TTC41P	ENSG00000214198	-1.166	2.11933	0.00521727	0.021201
UST	ENSG00000111962	-1.00146	3.55919	0.00519399	0.0211155
PRDM4	ENSG00000110851	1.09653	2.58208	0.00513128	0.0208877
RP11-30J20.1	ENSG00000254101	-1.75005	2.53057	0.00509739	0.0207677
NRCAM	ENSG00000091129	-1.66087	2.27351	0.0050847	0.020743
ASAP1	ENSG00000153317	-1.45439	2.37952	0.00496104	0.0202738
HSF4	ENSG00000102878	1.02984	2.04334	0.00495301	0.0202498
SMYD3	ENSG00000185420	-2.20147	2.98281	0.00482435	0.0198187					SMYD3	-2.20147
CELSR3-AS1	ENSG00000228350	1.00681	2.82315	0.00479196	0.0197115
CTA-363E6.5	ENSG00000260681	-1.06219	1.78286	0.00476281	0.0196173
GLDC	ENSG00000178445	1.41113	2.78293	0.00473414	0.0195308
LLNLR-259H9.1	ENSG00000280282	1.11623	1.50361	0.00466685	0.0192983
AC092573.2	ENSG00000236391	-1.01045	2.33355	0.0045775	0.0190041
PPM1H	ENSG00000111110	1.27696	3.63844	0.00450849	0.0187476
SLC14A2	ENSG00000132874	-1.91911	2.52184	0.00437961	0.0183202
AC124944.3	ENSG00000226155	1.06892	1.91807	0.00433605	0.0181704
CNTN1	ENSG00000018236	-1.7524	2.0525	0.00420795	0.0177285
DOCK2	ENSG00000134516	-1.39233	2.70583	0.00411736	0.0173919
KRTAP5-1	ENSG00000205869	1.14694	1.90895	0.00405001	0.0171709
MAP3K19	ENSG00000176601	1.26479	2.69814	0.00403072	0.0171046
RP13-1032I1.11	ENSG00000275902	1.09252	2.09111	0.00400218	0.0169989
PAFAH1B1	ENSG00000007168	1.19695	2.38519	0.00398592	0.0169528
SOX10	ENSG00000100146	1.28512	2.26732	0.00396247	0.016876
RP1-102E24.1	ENSG00000213942	1.12139	1.76373	0.00386715	0.0165526
TRAF7	ENSG00000131653	1.09639	2.72295	0.00383972	0.0164652
AC004381.6	ENSG00000005189	1.13775	2.58422	0.00382463	0.016408
INHBC	ENSG00000175189	1.10633	2.1811	0.003666	0.0158214
PPM1G	ENSG00000115241	1.21185	2.31176	0.00366087	0.0158065
LL0XNC01-237H1.3	ENSG00000234050	1.22494	2.0078	0.00365341	0.0157816
NKAIN2	ENSG00000188580	-1.95825	3.22102	0.00353507	0.0153481
C1orf159	ENSG00000131591	1.39692	2.66267	0.00352727	0.0153213
EPB41L1	ENSG00000088367	-1.42948	2.12868	0.00351667	0.015283
FAM111B	ENSG00000189057	1.0316	2.35331	0.0034309	0.0149789
ARHGEF3	ENSG00000163947	-1.5424	2.55545	0.00334812	0.014676
KIAA1549L	ENSG00000110427	1.40552	3.12416	0.00333829	0.0146705
RP11-826N14.4	ENSG00000251623	1.16433	2.29827	0.00331755	0.0145994
ALCAM	ENSG00000170017	-1.41223	1.83019	0.00320546	0.0141526
TMEM129	ENSG00000168936	1.14052	1.82581	0.00319469	0.0141116
SMIM20	ENSG00000250317	-1.34528	1.83309	0.00315303	0.0139407
AQP7	ENSG00000165269	1.18784	1.67838	0.00313851	0.0138831
TEKT4P2	ENSG00000188681	-1.08982	2.14722	0.00313727	0.0138831
LSAMP	ENSG00000185565	-1.94226	3.47395	0.00308967	0.0137058
CIR1	ENSG00000138433	1.00048	3.1197	0.00302282	0.0134409
SAMD4B	ENSG00000179134	1.11156	2.22193	0.00299704	0.0133326
CDAN1	ENSG00000140326	1.26683	2.45385	0.00298486	0.0132848
EDRF1	ENSG00000107938	1.16469	1.95139	0.00295834	0.0132168
LRRC57	ENSG00000180979	1.05814	2.80862	0.00294814	0.0131775
NT5C3A	ENSG00000122643	1.0894	2.81482	0.00280711	0.0126374
ASIC2	ENSG00000108684	-2.10325	3.1749	0.00279773	0.0126073					ASIC2	-2.10325
FAM174B	ENSG00000185442	-1.30763	2.02087	0.00274877	0.0124224
SERF2	ENSG00000140264	1.1271	2.32745	0.00268027	0.0121537
LINC01534	ENSG00000225975	1.18545	1.60434	0.00257232	0.0117038
DISC1FP1	ENSG00000261645	-2.08586	2.68664	0.00255175	0.0116328					DISC1FP1	-2.08586
ULK4	ENSG00000168038	1.72187	4.93371	0.00252016	0.0114999
CTD-2288O8.1	ENSG00000248898	-1.24805	1.98699	0.00251082	0.0114709
ASS1P12	ENSG00000237437	1.25182	2.30356	0.00245305	0.0112648
PLCB3	ENSG00000149782	1.10097	2.75783	0.00242596	0.0111677
ANK3	ENSG00000151150	-2.24787	2.5703	0.0024008	0.0110777					ANK3	-2.24787
TRAPPC9	ENSG00000167632	-2.3618	2.57763	0.00234848	0.010859					TRAPPC9	-2.3618
RP11-167N24.3	ENSG00000257943	1.39739	2.62927	0.0023117	0.01071
STPG2	ENSG00000163116	-1.71486	3.01272	0.00231014	0.0107081
RP11-16C1.3	ENSG00000265987	1.30087	1.81093	0.00230123	0.0106773
BAP1	ENSG00000163930	1.15574	2.36156	0.00230098	0.0106773
INPP4B	ENSG00000109452	-2.40448	2.59379	0.00225473	0.0104823					INPP4B	-2.40448
SLC35A3	ENSG00000117620	1.36017	2.20485	0.00224499	0.0104473
SRPX2	ENSG00000102359	1.29602	1.64813	0.00223129	0.0104042
CTNNA2	ENSG00000066032	-1.67755	4.12939	0.00222837	0.0103957
RARA-AS1	ENSG00000265666	1.32296	1.99615	0.00221755	0.0103504
BLNK	ENSG00000095585	1.07768	3.07044	0.00218842	0.0102399
RNF157	ENSG00000141576	-1.21362	2.19362	0.00216527	0.0101417
SLC25A3	ENSG00000075415	1.14225	2.56606	0.00216271	0.0101347
RP11-350N15.6	ENSG00000272159	-1.0691	2.23451	0.00214205	0.0100429
RP3-337H4.8	ENSG00000203362	1.03826	2.62636	0.00211877	0.00995472
LRRC37A6P	ENSG00000230445	1.18982	2.59386	0.00207493	0.00979672
GPHN	ENSG00000171723	-2.3636	2.46915	0.0020609	0.00974026					GPHN	-2.3636
SMLR1	ENSG00000256162	1.14885	1.99162	0.00202414	0.00959067
CLDND2	ENSG00000160318	1.29373	1.49953	0.00200506	0.00950986
TAT-AS1	ENSG00000260886	1.24501	2.15925	0.00198036	0.00942157
FER1L5	ENSG00000249715	1.00539	3.1804	0.00196752	0.00938396
SNTB1	ENSG00000172164	1.56228	3.54509	0.0019419	0.00927586
SLC20A2	ENSG00000168575	1.24742	3.34058	0.00193344	0.00924016
ITGA11	ENSG00000137809	1.31117	3.15126	0.00192659	0.00921682
SPARCL1	ENSG00000152583	1.13866	2.78045	0.00192525	0.00921511
SPATA17-AS1	ENSG00000234070	-1.13536	2.1735	0.00188843	0.00906194
FKBP10	ENSG00000141756	1.08441	2.58668	0.00184726	0.00890533
ARGFXP2	ENSG00000265293	1.2758	1.26404	0.00184524	0.00890287
APEX1	ENSG00000100823	1.33946	2.30728	0.00183348	0.00885256
RP11-1099M24.6	ENSG00000280046	1.13349	2.44798	0.00180995	0.00875677
GREB1L	ENSG00000141449	1.22591	3.73483	0.00178676	0.00865365
GAS2	ENSG00000148935	1.38577	2.86819	0.00178476	0.00864843
RP11-343K8.3	ENSG00000264914	1.14661	2.08693	0.00176804	0.00858956
MTBP	ENSG00000172167	-1.14269	2.20372	0.00174053	0.00847349
RP3-522J7.7	ENSG00000279345	1.41528	1.6474	0.00173486	0.00845025
NSD1	ENSG00000165671	1.46977	3.04133	0.00172983	0.00843176
TMEM9B-AS1	ENSG00000254860	1.16533	2.61898	0.00171386	0.00836532
PARP14	ENSG00000173193	1.09709	2.99066	0.00170588	0.00833068
TMEM126A	ENSG00000171202	1.20299	2.65944	0.00170437	0.00832766
RP11-624C23.1	ENSG00000253535	-2.18715	2.48298	0.00169991	0.00831451					RP11-624C23.1	-2.18715
SNORA2	ENSG00000206647	1.26808	1.60804	0.00169014	0.00827968
AC009264.1	ENSG00000234352	-1.23659	3.37161	0.00166834	0.00818567
FBXL8	ENSG00000135722	1.29649	1.77604	0.00166511	0.00817408
COX7A1	ENSG00000161281	1.1155	2.96427	0.0016524	0.00812445
KCTD20	ENSG00000112078	1.02655	2.98445	0.00164901	0.00811203
HOTTIP	ENSG00000243766	-1.33184	1.73112	0.0016405	0.00808286
C1orf168	ENSG00000187889	1.17537	2.95675	0.00163059	0.00804672
ALK	ENSG00000171094	1.27247	4.96119	0.00158668	0.00785066
HIST1H3E	ENSG00000274750	1.21479	2.06967	0.00153841	0.00763592
U3	ENSG00000221496	1.23933	1.99179	0.00153687	0.00763561
PTPN6	ENSG00000111679	1.25702	1.57181	0.00150518	0.00750275
IL1RAPL2	ENSG00000189108	-1.78229	2.76636	0.00149484	0.00746325
LARGE1	ENSG00000133424	-2.68015	2.77173	0.00148512	0.00743034					LARGE1	-2.68015
RP11-353N14.4	ENSG00000262188	1.37762	2.13506	0.00146126	0.00732269
RAC1	ENSG00000136238	1.27883	1.49169	0.00144753	0.00726939
SLC25A15	ENSG00000102743	1.06005	2.78738	0.00143322	0.00720907
COL4A3BP	ENSG00000113163	1.16428	3.1328	0.00142101	0.00715148
LINC00242	ENSG00000229214	1.05821	3.00794	0.00141645	0.00714003
MCC	ENSG00000171444	1.15114	4.6337	0.00139404	0.00703842
RARB	ENSG00000077092	1.46776	4.30183	0.0013601	0.00691161
CLDN5	ENSG00000184113	1.49541	1.41888	0.00135471	0.00688796
RP11-793H13.11	ENSG00000270175	1.22686	2.20248	0.00134759	0.0068592
DIO1	ENSG00000211452	1.03876	3.10327	0.00130997	0.00669347
HMGB3P24	ENSG00000215283	1.37067	1.83807	0.00130703	0.00668768
SOX2-OT	ENSG00000242808	-2.58126	2.82371	0.00129982	0.00665936					SOX2-OT	-2.58126
TAF11	ENSG00000064995	1.29937	2.91834	0.00127925	0.00656473
SHISA5	ENSG00000164054	1.32412	1.64733	0.00127071	0.00653158
GRID2	ENSG00000152208	-2.41609	3.43906	0.00125612	0.00646016					GRID2	-2.41609
ZNF821	ENSG00000102984	1.1144	2.73817	0.00123524	0.00637372
CROCCP3	ENSG00000080947	1.09245	2.70188	0.00120263	0.00623625
ITGB5	ENSG00000082781	1.07587	4.1962	0.00120055	0.00623237
CACNA2D2	ENSG00000007402	1.07731	3.40099	0.00119207	0.00619175
YARS	ENSG00000134684	1.1626	3.0569	0.00115751	0.00602559
ZDHHC5	ENSG00000156599	1.0465	2.74194	0.00113163	0.00590725
CCDC153	ENSG00000248712	1.26562	2.18595	0.00112156	0.00586448
ZFP28	ENSG00000196867	1.22917	2.18821	0.00110784	0.00580133
AQP4-AS1	ENSG00000260372	-1.00611	3.73487	0.0010925	0.00574451
RP11-135A24.2	ENSG00000229327	1.19533	2.83252	0.00105534	0.00558236
ADGRL3	ENSG00000150471	-2.79392	2.47998	0.00105297	0.00557725					ADGRL3	-2.79392
TBC1D5	ENSG00000131374	-1.98448	3.57146	0.00104657	0.0055496
CDK7	ENSG00000134058	1.06371	3.00968	0.00101288	0.00540143
COL4A6	ENSG00000197565	1.37415	2.35747	0.00100012	0.00534249
ARF1	ENSG00000143761	1.29036	1.71843	0.000971059	0.00521694
NBEA	ENSG00000172915	-2.56694	2.24602	0.000969661	0.00521241					NBEA	-2.56694
PIGZ	ENSG00000119227	1.44307	2.04681	0.000960523	0.00517217
C10orf11	ENSG00000148655	-2.83601	3.20859	0.000957388	0.00516121					C10orf11	-2.83601
KLHL29	ENSG00000119771	1.32518	4.3249	0.000944456	0.00509442
NRBF2P5	ENSG00000270427	1.22815	2.11159	0.000937519	0.00505991
METTL7A	ENSG00000185432	1.14037	2.71286	0.000936737	0.0050586
ZRSR2	ENSG00000169249	1.3296	1.557	0.000925729	0.00501398
ANXA10	ENSG00000109511	1.05988	3.05984	0.000907862	0.00492817
MPL	ENSG00000117400	1.10249	2.62368	0.000887061	0.00483201
KCNA7	ENSG00000104848	1.0819	2.83857	0.000862349	0.00471648
SNORA74	ENSG00000252129	1.14304	2.81755	0.000848374	0.00465095
LYSMD3	ENSG00000176018	1.14435	2.92399	0.000805268	0.0044484
ABHD3	ENSG00000158201	1.35394	2.19496	0.000783626	0.00433905
PARP16	ENSG00000138617	1.28529	2.42232	0.000778036	0.00431483
TMEM160	ENSG00000130748	1.33034	1.92617	0.000777945	0.00431483
SPAG16	ENSG00000144451	-2.64828	3.12488	0.00077345	0.004303					SPAG16	-2.64828
CORO1A	ENSG00000102879	1.28903	2.74573	0.000767448	0.00427468
LA16c-60H5.7	ENSG00000215270	1.08362	3.26429	0.000763793	0.00425937
BTBD9	ENSG00000183826	1.08398	4.51008	0.000755696	0.00422425
RP11-381E24.4	ENSG00000276763	1.33359	2.09664	0.000752798	0.00421307
NDUFAF1	ENSG00000137806	1.29118	2.3127	0.00072236	0.00407184
AGAP1	ENSG00000157985	-1.81199	3.34547	0.000704807	0.00398485
RP11-274B21.12	ENSG00000229413	1.03502	3.26208	0.00069218	0.00392291
CTD-2095E4.4	ENSG00000280020	1.42526	1.71529	0.00068533	0.00389584
TSG101	ENSG00000074319	1.42807	2.63838	0.000684571	0.00389389
RP4-738P15.1	ENSG00000230725	1.31539	1.66657	0.000684282	0.00389389
FBXO10	ENSG00000147912	1.16632	2.58195	0.000676248	0.00385823
EML6	ENSG00000214595	1.44547	3.9438	0.000675657	0.0038572
RP11-95P13.1	ENSG00000230024	1.04805	3.02797	0.000673619	0.00385259
NXF1	ENSG00000162231	1.30208	2.73782	0.00063958	0.00367133
RWDD2A	ENSG00000013392	1.4226	1.89876	0.00063881	0.00367133
SMTN	ENSG00000183963	1.09234	2.95795	0.000626988	0.00362341
RGPD2	ENSG00000185304	1.01504	3.44336	0.00058403	0.00339816
FGF14	ENSG00000102466	-1.9472	2.81953	0.000578813	0.00337132
HPCAL1	ENSG00000115756	1.43954	2.77857	0.000568352	0.00331928
SIPA1L1	ENSG00000197555	-1.00443	3.8482	0.000567461	0.00331613
RP11-481K16.2	ENSG00000248924	1.02723	3.55557	0.000560636	0.00327829
WDR70	ENSG00000082068	-1.88366	2.49571	0.000540637	0.00318115
UPK1A-AS1	ENSG00000226510	1.51001	1.50384	0.000534565	0.00314937
CTC-241N9.1	ENSG00000245317	1.40639	1.85374	0.000528351	0.00312059
TGM1	ENSG00000092295	1.52735	2.0137	0.000502374	0.00298217
DLG2	ENSG00000150672	-2.62954	3.98353	0.000496551	0.00295134					DLG2	-2.62954
HNRNPF	ENSG00000169813	1.15971	2.66927	0.00049209	0.00292667
AC068196.1	ENSG00000238171	1.33947	2.46137	0.000491167	0.00292304
TRMT13	ENSG00000122435	1.20574	2.52957	0.000486656	0.00290171
CNTNAP2	ENSG00000174469	-2.84924	4.00849	0.00047828	0.00285997					CNTNAP2	-2.84924
RAET1E-AS1	ENSG00000268592	-1.3007	1.95033	0.00046711	0.00280117
ZNF24	ENSG00000172466	1.41602	1.98129	0.000460854	0.00276718
LTBP2	ENSG00000119681	1.32248	2.99374	0.000460063	0.00276597
NRG3	ENSG00000185737	-2.53051	3.20515	0.000456292	0.00274506					NRG3	-2.53051
HFE	ENSG00000010704	1.40074	2.41257	0.000441535	0.00266825
GTPBP1	ENSG00000100226	1.16951	2.91839	0.000438716	0.00265463
RP11-72M17.1	ENSG00000258561	-1.48287	2.64513	0.000437084	0.00264646
PM20D1	ENSG00000162877	1.41812	1.50318	0.000427622	0.00259681
DOK7	ENSG00000175920	1.45046	3.03603	0.000420403	0.00256032
AGO2	ENSG00000123908	1.24086	3.43992	0.000413889	0.00252392
CADM2	ENSG00000175161	-2.56036	2.84215	0.00040972	0.00250337					CADM2	-2.56036
SLC6A7	ENSG00000011083	1.54322	2.09437	0.000402448	0.00246536
ZNF513	ENSG00000163795	1.66683	2.31726	0.000395222	0.00242742
XXbac-B444P24.10	ENSG00000161132	1.14486	2.76277	0.000387826	0.00238512
CIC	ENSG00000079432	1.37143	2.16988	0.000383741	0.00236619
SLC12A7	ENSG00000113504	1.28873	2.43705	0.000382008	0.00235705
CFAP100	ENSG00000163885	1.41374	2.1184	0.000381596	0.00235606
UBXN8	ENSG00000104691	1.1151	3.07795	0.000371232	0.00230408
HACD3	ENSG00000074696	1.18366	3.17445	0.000366041	0.00228102
SMIM22	ENSG00000267795	1.2531	3.17017	0.000362395	0.0022628
RP5-864K19.7	ENSG00000273637	1.31356	2.56596	0.000347739	0.00218436
PLXNB3	ENSG00000198753	1.38231	2.90474	0.000344345	0.00216739
RP11-712B9.2	ENSG00000245552	1.04957	3.48923	0.000342447	0.0021572
COMT	ENSG00000093010	1.45199	1.86117	0.000339279	0.0021398
LRP1B	ENSG00000168702	-3.02773	3.67542	0.000338894	0.00213882					LRP1B	-3.02773
PDK2	ENSG00000005882	1.43774	2.41101	0.000334494	0.00211673
XYLT1	ENSG00000103489	-1.34301	3.34881	0.000321499	0.00204276
LZTR1	ENSG00000099949	1.29959	2.48885	0.000310068	0.00197682
DGAT1	ENSG00000185000	1.20166	2.98669	0.000306467	0.00195518
RP11-188C12.3	ENSG00000203987	1.49684	1.56505	0.000305568	0.0019521
DTYMK	ENSG00000168393	1.05638	3.36886	0.00030518	0.00195095
GPRIN2	ENSG00000204175	1.60648	2.40958	0.000278611	0.00180319
C7orf71	ENSG00000222004	1.54314	2.50814	0.000276066	0.00179043
RTN3	ENSG00000133318	1.54465	3.10465	0.000267839	0.00174344
RPS11P6	ENSG00000243024	-1.05124	3.65984	0.00026713	0.00174088
ORC2	ENSG00000115942	1.45891	2.35936	0.00026663	0.00173883
GEMIN2	ENSG00000092208	1.66692	1.95671	0.000264769	0.0017303
ADCY10	ENSG00000143199	1.15553	3.47671	0.000257037	0.00168564
TRPM3	ENSG00000083067	-3.11015	2.93925	0.00025212	0.00165571					TRPM3	-3.11015
COA5	ENSG00000183513	1.49358	2.43595	0.000244241	0.00161072
PSMA7	ENSG00000101182	1.43754	2.39899	0.000234529	0.00155322
GHRLOS	ENSG00000240288	1.45639	2.24937	0.000233728	0.001549
AC141586.5	ENSG00000215154	1.27084	2.85565	0.000229614	0.00152497
RP11-347C12.10	ENSG00000260219	1.37253	2.82772	0.000216093	0.00144129
PSMD3	ENSG00000108344	1.39691	2.31009	0.000201696	0.00135488
PRDX3P2	ENSG00000231468	1.44749	2.34248	0.000191201	0.00129178
RP5-1024N4.2	ENSG00000223720	1.54173	1.8406	0.000180342	0.00122281
RP11-374P20.4	ENSG00000235138	1.13161	3.74094	0.000172484	0.00117376
EIF2S1	ENSG00000134001	1.2913	2.71105	0.000170798	0.00116532
ARID5A	ENSG00000196843	1.43994	2.44332	0.00017022	0.00116257
PIK3IP1	ENSG00000100100	1.31985	2.62935	0.000169682	0.00115974
RP11-516J2.1	ENSG00000258402	1.21169	2.98086	0.000166908	0.00114244
PTPRD	ENSG00000153707	-2.32839	4.37223	0.000166481	0.00114035					PTPRD	-2.32839
LRRC46	ENSG00000141294	1.36108	2.7013	0.000158221	0.00108774
CHRNG	ENSG00000196811	1.2933	2.70318	0.000153549	0.00105872
AASDHPPT	ENSG00000149313	-1.38745	2.40068	0.000152795	0.0010543
FCGR1A	ENSG00000150337	1.3385	2.55475	0.000149689	0.00103515
PITPNM3	ENSG00000091622	1.37412	3.16864	0.000148154	0.00102604
IARS2	ENSG00000067704	1.37261	2.91421	0.000142269	0.000988204
ACPT	ENSG00000142513	1.45513	3.03483	0.000141156	0.000982327
HSD3B7	ENSG00000099377	1.22748	2.82543	0.000136377	0.000950795
RP11-672A2.3	ENSG00000254975	1.2722	3.01029	0.000135498	0.000946067
GNA14	ENSG00000156049	1.50224	3.3661	0.000131835	0.000922553
HOTAIRM1	ENSG00000233429	1.00019	3.62139	0.00013116	0.000919884
KCNG2	ENSG00000178342	1.38419	3.12184	0.0001311	0.000919884
PRMT9	ENSG00000164169	1.09567	3.50657	0.000130185	0.000914408
NOC3L	ENSG00000173145	1.11305	3.38587	0.000124184	0.000878172
RNF146	ENSG00000118518	1.45888	1.99994	0.000111758	0.000796899
KIFC1	ENSG00000237649	1.11196	3.30362	0.00011136	0.000794669
SEMA3B-AS1	ENSG00000232352	1.33351	3.13775	0.000111112	0.000793498
CDC37L1	ENSG00000106993	1.36362	2.98339	0.000107198	0.000769055
CACNA2D3	ENSG00000157445	-2.60632	3.44396	0.000104506	0.000752618					CACNA2D3	-2.60632
GINS1	ENSG00000101003	1.53923	2.84644	0.000104472	0.000752618
CCDC121	ENSG00000176714	1.54345	2.19048	0.000104451	0.000752618
PLCH2	ENSG00000149527	1.45515	3.05614	9.88361e-05	0.000716733
C16orf86	ENSG00000159761	1.63131	2.40431	9.56959e-05	0.000695035
SETD1A	ENSG00000099381	1.18825	2.98957	9.35876e-05	0.000681831
FAM156A	ENSG00000268350	1.26631	3.12062	9.07756e-05	0.000661859
RP11-513M16.8	ENSG00000273226	1.59103	2.74786	8.92669e-05	0.000652886
ITSN1	ENSG00000205726	2.0011	3.7525	8.836e-05	0.000646829
ATP2A1-AS1	ENSG00000260442	1.63792	2.58255	8.7614e-05	0.000643302
TOR1B	ENSG00000136816	1.14276	3.34193	8.59462e-05	0.000632364
CTD-3214H19.6	ENSG00000268204	1.56583	2.87184	8.46473e-05	0.000623469
CNNM1	ENSG00000119946	1.66048	2.26704	8.381e-05	0.000618698
PHYHIP	ENSG00000168490	1.57578	1.98429	8.33597e-05	0.000615917
NPAS2	ENSG00000170485	1.42912	3.50491	8.12596e-05	0.000602296
STEAP3	ENSG00000115107	1.5716	2.53836	7.97889e-05	0.000593738
KCTD19	ENSG00000168676	1.2738	2.98952	7.97202e-05	0.000593738
TTC31	ENSG00000115282	1.44358	3.02372	7.86031e-05	0.000586308
PROCR	ENSG00000101000	1.11685	3.5839	7.60481e-05	0.00056827
EPN2-AS1	ENSG00000235397	1.13587	3.6773	7.59374e-05	0.00056823
INSL6	ENSG00000120210	1.48092	2.88942	7.3318e-05	0.000549944
MST1	ENSG00000173531	1.12548	3.27237	7.25761e-05	0.00054525
PLAT	ENSG00000104368	1.18273	3.2729	6.98062e-05	0.000526124
C9orf139	ENSG00000180539	1.23614	3.15012	6.97448e-05	0.000526124
THEM6	ENSG00000130193	1.17026	3.41909	6.88079e-05	0.000520689
RASGRP4	ENSG00000171777	1.45451	3.10822	6.84052e-05	0.000518896
RGMB	ENSG00000174136	1.51827	2.40284	6.67364e-05	0.000507057
GPR62	ENSG00000180929	1.59045	1.7718	6.40691e-05	0.000488768
PHF19	ENSG00000119403	1.51686	2.1439	6.19066e-05	0.000472655
THSD7B	ENSG00000144229	-3.00626	2.8823	6.12317e-05	0.000467882					THSD7B	-3.00626
VLDLR	ENSG00000147852	1.00185	3.92518	5.98555e-05	0.000458859
CSMD1	ENSG00000183117	-1.01703	5.9787	5.85698e-05	0.000450106
RP11-509A17.3	ENSG00000258654	1.45843	3.21908	5.62054e-05	0.000432998
SMAD3	ENSG00000166949	1.13611	3.6891	5.5528e-05	0.000428131
CEND1	ENSG00000184524	1.6502	2.22568	5.36216e-05	0.000415136
QRICH1	ENSG00000198218	1.56033	2.05516	5.22369e-05	0.000405419
MRPS34	ENSG00000074071	1.51521	2.3241	5.04141e-05	0.000392895
FZR1	ENSG00000105325	1.03329	3.71293	4.98084e-05	0.00038882
SECTM1	ENSG00000141574	1.53587	2.85152	4.86295e-05	0.000380566
PRKCA-AS1	ENSG00000264630	1.62689	1.55095	4.54841e-05	0.000357441
EFEMP2	ENSG00000172638	1.6213	2.54698	4.19303e-05	0.000332574
RP11-513G11.2	ENSG00000228271	1.69745	2.30505	3.91037e-05	0.000311999
RP11-428P16.2	ENSG00000213514	1.3769	2.74564	3.90915e-05	0.000311999
RWDD1	ENSG00000111832	1.53326	2.2759	3.87817e-05	0.000310221
ZNF862	ENSG00000106479	1.03606	3.68442	3.77977e-05	0.000303383
PPME1	ENSG00000214517	1.04462	4.2645	3.70219e-05	0.000297665
RP11-174G6.1	ENSG00000214772	1.42074	3.43029	3.59833e-05	0.000289562
ZP1	ENSG00000149506	1.6697	2.11325	3.41031e-05	0.000274903
DPYSL4	ENSG00000151640	1.20471	3.47811	3.19616e-05	0.000258528
CTD-2201I18.1	ENSG00000249825	1.54955	2.49066	3.10484e-05	0.00025201
RSPH4A	ENSG00000111834	1.28263	3.27165	3.05461e-05	0.000248837
POLR2E	ENSG00000099817	1.4937	2.66874	2.98232e-05	0.000243963
RP11-714G18.1	ENSG00000250410	1.298	3.11639	2.77548e-05	0.000228436
DNAH12	ENSG00000174844	1.66867	3.86701	2.72519e-05	0.000224691
AC000068.5	ENSG00000185065	1.57405	2.60588	2.59679e-05	0.000215238
IL20RB-AS1	ENSG00000249407	1.61878	2.85022	2.57687e-05	0.000214154
DLC1	ENSG00000164741	-1.36403	3.50507	2.57678e-05	0.000214154
RP11-1223D19.6	ENSG00000283167	1.63582	2.70044	2.55178e-05	0.000212633
CAP1	ENSG00000131236	1.27744	3.14154	2.48577e-05	0.000208056
NOS3	ENSG00000164867	1.69307	2.01142	2.45419e-05	0.000205596
USP47	ENSG00000170242	1.03006	3.7383	2.4538e-05	0.000205596
RP11-192M23.1	ENSG00000259381	1.4087	2.6217	2.44529e-05	0.0002054
RHPN2	ENSG00000131941	1.1735	4.07814	2.42381e-05	0.000203961
TUBA3E	ENSG00000152086	1.69463	2.42162	2.40975e-05	0.000202959
HTATSF1P2	ENSG00000271361	1.21647	3.30934	2.32223e-05	0.000196646
DDOST	ENSG00000244038	1.78271	1.91064	2.15944e-05	0.000184023
SMG5	ENSG00000198952	1.73027	1.87889	2.14223e-05	0.000182888
PCNX2	ENSG00000135749	1.46738	4.84706	2.1017e-05	0.000179754
SERINC3	ENSG00000132824	1.69305	1.88453	2.05621e-05	0.000176185
FAM166B	ENSG00000215187	1.65838	1.68818	2.04302e-05	0.000175215
LYPLAL1-AS1	ENSG00000228063	-1.43375	2.61624	1.99188e-05	0.000171141
TSTD3	ENSG00000228439	1.778	1.97486	1.98478e-05	0.000170687
RP11-551L14.7	ENSG00000270926	1.25913	3.27983	1.97626e-05	0.000170111
NAALADL2	ENSG00000177694	-1.04179	5.41919	1.92303e-05	0.000165833
PSKH1	ENSG00000159792	1.3975	3.08586	1.85061e-05	0.000159882
PYCR1	ENSG00000183010	1.69094	2.70065	1.83697e-05	0.000158849
SLC16A8	ENSG00000100156	1.0965	4.74878	1.82885e-05	0.000158292
JOSD1	ENSG00000100221	1.36783	2.90757	1.8055e-05	0.000156416
TUBG2	ENSG00000037042	1.73753	2.57416	1.78349e-05	0.000154651
RP11-554A11.8	ENSG00000261070	1.1295	3.58939	1.77938e-05	0.000154438
GNS	ENSG00000135677	1.65213	2.83986	1.73134e-05	0.000150407
EPS8L1	ENSG00000131037	1.00062	4.91187	1.69602e-05	0.000147612
LILRA6	ENSG00000244482	1.5499	2.61286	1.66124e-05	0.000144854
AP001189.4	ENSG00000236304	1.65598	2.83571	1.65687e-05	0.000144606
SLC39A5	ENSG00000139540	1.71271	2.1931	1.62969e-05	0.000142367
RP11-51M24.1	ENSG00000249875	1.42253	3.04761	1.59871e-05	0.000139921
ART3	ENSG00000156219	1.68244	2.90631	1.45964e-05	0.000128227
MFSD14A	ENSG00000156875	1.65986	2.28052	1.45439e-05	0.000127885
PIAS4	ENSG00000105229	1.63211	2.90182	1.45231e-05	0.000127822
FTO	ENSG00000140718	-1.21337	3.91332	1.44525e-05	0.00012732
TRAPPC2	ENSG00000196459	1.53393	2.71112	1.39699e-05	0.0001233
EPX	ENSG00000121053	1.28882	3.2031	1.34602e-05	0.000118913
BTBD18	ENSG00000233436	1.74873	2.32306	1.33795e-05	0.000118312
SLF2	ENSG00000119906	1.35783	3.1427	1.33235e-05	0.000118039
SLC25A4	ENSG00000151729	1.38121	2.98181	1.31145e-05	0.000116407
MTMR2	ENSG00000087053	1.02645	3.76749	1.29139e-05	0.000114734
ADGB	ENSG00000118492	-1.16555	3.57065	1.28473e-05	0.000114359
CLTB	ENSG00000175416	1.68989	2.30087	1.28376e-05	0.000114359
AC074391.1	ENSG00000204929	-1.88858	3.34032	1.23423e-05	0.000110282
PPIA	ENSG00000196262	1.27296	3.23034	1.2057e-05	0.000107835
DDX55	ENSG00000111364	1.04662	3.74558	1.19883e-05	0.000107324
SLC35A2	ENSG00000102100	1.82051	2.07121	1.15156e-05	0.000103486
RP11-304M2.3	ENSG00000255229	1.51892	3.03281	1.11999e-05	0.000100746
ANKRD40	ENSG00000154945	1.77375	2.60511	1.11561e-05	0.000100447
RP11-252A24.5	ENSG00000261170	1.62403	2.84143	1.076e-05	9.7067e-05
UBE2R2	ENSG00000107341	1.50585	3.4775	1.06572e-05	9.62324e-05
THBS2	ENSG00000186340	1.16106	3.68468	1.02506e-05	9.2829e-05
CAPN2	ENSG00000162909	1.01823	4.37434	1.00938e-05	9.14972e-05
PPP1R9A	ENSG00000158528	2.50927	4.29823	9.95106e-06	9.03776e-05
RP11-400F19.6	ENSG00000266962	1.12175	3.77685	9.65116e-06	8.79088e-05
GPR68	ENSG00000119714	1.12808	3.99548	9.54e-06	8.715e-05
CTB-186G2.4	ENSG00000267375	1.29345	3.30124	9.43759e-06	8.62984e-05
SLC37A2	ENSG00000134955	1.64364	2.59977	9.26558e-06	8.4808e-05
SKIV2L	ENSG00000204351	1.67615	2.40851	9.075e-06	8.33072e-05
DGKD	ENSG00000077044	1.22186	3.80136	8.87258e-06	8.15288e-05
BIRC6-AS2	ENSG00000279897	1.46025	2.98328	8.68959e-06	7.99255e-05
ALKBH4	ENSG00000160993	1.49378	3.07063	8.65598e-06	7.96945e-05
IL23A	ENSG00000110944	1.72584	2.43312	7.80353e-06	7.21999e-05
ALS2CR11	ENSG00000155754	1.06586	4.37791	7.51213e-06	6.96411e-05
NOB1	ENSG00000141101	-1.01453	3.82768	7.48614e-06	6.94687e-05
WDR26	ENSG00000162923	1.31745	3.52511	7.21263e-06	6.70631e-05
KLHL20	ENSG00000076321	1.88004	2.51122	7.0225e-06	6.54899e-05
PHF24	ENSG00000122733	1.87007	2.42616	7.01616e-06	6.54899e-05
CCDC13-AS1	ENSG00000173811	1.49533	3.16275	6.77337e-06	6.35452e-05
PTK6	ENSG00000101213	1.07523	3.86287	6.26057e-06	5.88519e-05
FAM159B	ENSG00000145642	1.75838	2.24707	6.18415e-06	5.81918e-05
TNN	ENSG00000120332	1.46122	3.24448	5.94095e-06	5.62414e-05
RAD51	ENSG00000051180	1.24326	3.5322	5.54507e-06	5.27063e-05
CCDC167	ENSG00000198937	1.85078	2.76718	4.81592e-06	4.60812e-05
ZSCAN31	ENSG00000235109	1.42161	3.41549	4.73186e-06	4.53901e-05
UBE2L3	ENSG00000185651	1.00276	4.16197	4.66528e-06	4.47971e-05
ALG12	ENSG00000182858	1.52448	3.30461	4.40324e-06	4.2542e-05
DNAJC11	ENSG00000007923	1.27497	3.94808	4.31208e-06	4.17042e-05
AATBC	ENSG00000215458	1.54286	3.30846	4.20178e-06	4.07633e-05
PGAP2	ENSG00000148985	1.86743	2.62813	4.08668e-06	3.977e-05
AP001468.58	ENSG00000228404	1.88263	2.75528	4.0125e-06	3.92515e-05
PDE3B	ENSG00000152270	1.43592	4.39881	3.86368e-06	3.79141e-05
MAPK8	ENSG00000107643	1.33391	3.71198	3.83952e-06	3.77164e-05
RGL2	ENSG00000237441	1.26398	3.51548	3.82036e-06	3.75676e-05
CTD-2538C1.3	ENSG00000267567	1.79444	2.65414	3.79963e-06	3.74421e-05
GNPNAT1	ENSG00000100522	1.30854	3.5036	3.6887e-06	3.63872e-05
SHC3	ENSG00000148082	1.1905	4.00205	3.45066e-06	3.41107e-05
STRA13	ENSG00000169689	1.49358	3.48328	3.17722e-06	3.15072e-05
CCND1	ENSG00000110092	1.55986	3.34456	3.1508e-06	3.13113e-05
SPATA4	ENSG00000150628	1.90207	2.48508	3.14628e-06	3.12995e-05
RHOBTB1	ENSG00000072422	1.83051	3.13652	3.09074e-06	3.07796e-05
RABEP2	ENSG00000177548	1.74301	2.12969	2.97864e-06	2.97263e-05
RP11-723O4.2	ENSG00000231305	1.77066	2.62917	2.95322e-06	2.95039e-05
FUT11	ENSG00000196968	1.77583	2.32032	2.68423e-06	2.69889e-05
ZNF142	ENSG00000115568	1.33045	3.53618	2.63721e-06	2.65445e-05
CDT1	ENSG00000167513	1.82585	2.37313	2.39543e-06	2.42669e-05
RP11-315I20.3	ENSG00000244619	1.9716	2.54917	2.31381e-06	2.35162e-05
RP11-104H15.8	ENSG00000263301	1.01967	4.64421	2.07306e-06	2.11841e-05
ABCB8	ENSG00000197150	1.7568	2.91692	2.02778e-06	2.07439e-05
ZBTB11-AS1	ENSG00000256628	1.05386	3.97641	1.98756e-06	2.03546e-05
POLR2C	ENSG00000102978	1.51368	2.92389	1.97624e-06	2.02607e-05
ATG14	ENSG00000126775	1.00233	4.04709	1.835e-06	1.88952e-05
RRAS	ENSG00000126458	1.3062	3.47563	1.79187e-06	1.84714e-05
CTD-3137H5.1	ENSG00000268199	1.09978	4.27816	1.76871e-06	1.82527e-05
DDX43	ENSG00000080007	1.84745	2.15376	1.71273e-06	1.76944e-05
ZMYND10-AS1	ENSG00000235058	1.45886	3.57876	1.70422e-06	1.76453e-05
RP11-56B16.2	ENSG00000259556	1.08088	4.75899	1.70159e-06	1.76376e-05
ZNF526	ENSG00000167625	1.75098	2.324	1.68693e-06	1.75049e-05
MYL6B	ENSG00000196465	1.83411	1.95711	1.62606e-06	1.69106e-05
NODAL	ENSG00000156574	1.56083	3.17423	1.51219e-06	1.57789e-05
XPC	ENSG00000154767	1.05306	4.05452	1.42145e-06	1.49149e-05
PPL	ENSG00000118898	1.74578	3.85115	1.41252e-06	1.48378e-05
SCYL1	ENSG00000142186	1.71814	2.9579	1.38919e-06	1.46255e-05
ABCG5	ENSG00000138075	1.54729	2.9327	1.32611e-06	1.4014e-05
ARL13B	ENSG00000169379	1.02517	4.24317	1.3233e-06	1.40103e-05
TNFRSF12A	ENSG00000006327	1.83864	2.02517	1.25794e-06	1.33484e-05
GBAP1	ENSG00000160766	1.58841	3.04728	1.1921e-06	1.26675e-05
RP1-149A16.3	ENSG00000230736	1.39957	3.53996	1.17995e-06	1.25634e-05
BRSK2	ENSG00000174672	1.43109	3.86358	1.16116e-06	1.23914e-05
VPS13B	ENSG00000132549	1.95363	5.59823	1.11868e-06	1.1979e-05
GNB4	ENSG00000114450	1.11517	3.99699	1.11624e-06	1.19664e-05
HAGH	ENSG00000063854	1.12326	3.78352	1.11174e-06	1.19318e-05
MCMBP	ENSG00000197771	1.70297	2.81553	1.09395e-06	1.17543e-05
RP11-352D13.6	ENSG00000261634	1.75216	2.70507	1.0442e-06	1.12326e-05
NR2E3	ENSG00000278570	1.51567	3.26081	1.02377e-06	1.10255e-05
YIF1B	ENSG00000167645	1.19415	4.14787	1.0127e-06	1.09188e-05
OSGEPL1-AS1	ENSG00000253559	1.61512	3.15649	9.98327e-07	1.07762e-05
FLJ12825	ENSG00000248265	1.26947	3.58852	9.76393e-07	1.05637e-05
PCOLCE-AS1	ENSG00000224729	1.12293	4.13612	8.94676e-07	9.69077e-06
ARPC1B	ENSG00000130429	1.18189	4.39379	8.70115e-07	9.44653e-06
C11orf42	ENSG00000180878	1.04413	4.69212	8.39456e-07	9.1348e-06
RNF139	ENSG00000170881	1.83102	2.65544	8.33789e-07	9.08366e-06
TALDO1	ENSG00000177156	1.15723	4.03738	8.26151e-07	9.02138e-06
LAT2	ENSG00000086730	1.07522	4.47748	8.07528e-07	8.82828e-06
GGN	ENSG00000179168	1.04041	4.98268	7.2712e-07	7.96778e-06
ZNF420	ENSG00000197050	1.23584	4.16999	7.03696e-07	7.72966e-06
KIF22	ENSG00000079616	1.2614	4.50141	6.75714e-07	7.45667e-06
HS3ST4	ENSG00000182601	-1.0383	4.90995	6.65533e-07	7.35296e-06
CCNI2	ENSG00000205089	1.91537	2.4349	6.54711e-07	7.25046e-06
SH3GLB2	ENSG00000148341	1.83942	2.59966	6.47588e-07	7.18005e-06
APOBEC2	ENSG00000124701	1.65504	3.00629	6.38964e-07	7.0928e-06
FAM216A	ENSG00000204856	1.16271	4.04261	6.17863e-07	6.89935e-06
LGALS2	ENSG00000100079	1.73659	2.96971	5.99564e-07	6.70299e-06
HIGD1C	ENSG00000214511	1.62748	2.81103	5.97598e-07	6.68896e-06
SLC6A8	ENSG00000130821	1.8338	3.12071	5.84692e-07	6.55232e-06
MYCBPAP	ENSG00000136449	1.72588	3.26936	5.72576e-07	6.4242e-06
RBFOX3	ENSG00000167281	1.22539	5.24174	5.5899e-07	6.27928e-06
GPX3	ENSG00000211445	1.21395	4.2844	5.52912e-07	6.21844e-06
TMC5	ENSG00000103534	1.50937	3.95171	5.52126e-07	6.21704e-06
AANAT	ENSG00000129673	1.13265	4.83274	5.40183e-07	6.08986e-06
TMEM92-AS1	ENSG00000251179	1.04112	4.22196	5.20393e-07	5.87381e-06
RP11-589M4.3	ENSG00000258698	2.02307	2.59012	5.1374e-07	5.81268e-06
DSCR9	ENSG00000230366	1.58007	2.98902	4.80835e-07	5.46674e-06
RPL12	ENSG00000197958	1.06528	4.35787	4.19782e-07	4.79001e-06
ZNF784	ENSG00000179922	1.85197	3.22401	4.1102e-07	4.70145e-06
C21orf2	ENSG00000160226	1.04258	4.70165	3.80262e-07	4.36557e-06
TIGD7	ENSG00000140993	1.37258	3.82011	3.66121e-07	4.20837e-06
RP11-667K14.5	ENSG00000262810	1.61831	3.22262	3.64443e-07	4.19422e-06
SORCS2	ENSG00000184985	2.30753	5.2102	3.64422e-07	4.19422e-06
MLST8	ENSG00000167965	1.61538	3.07501	3.62208e-07	4.17874e-06
ARV1	ENSG00000173409	1.03515	4.70973	3.59009e-07	4.14693e-06
FAM65C	ENSG00000042062	1.68777	3.62267	3.54338e-07	4.09802e-06
RP11-176D17.3	ENSG00000228470	2.0104	2.33785	3.50922e-07	4.06352e-06
CCDC90B	ENSG00000137500	1.75699	2.97173	3.40284e-07	3.95007e-06
AMBP	ENSG00000106927	1.69887	3.26871	3.17682e-07	3.70603e-06
LIPC	ENSG00000166035	1.36263	4.25839	3.06959e-07	3.58986e-06
HMBS	ENSG00000256269	2.18171	1.92945	3.06797e-07	3.58986e-06
HORMAD2-AS1	ENSG00000227117	1.06549	4.76539	3.05196e-07	3.57815e-06
TCF7	ENSG00000081059	1.04424	4.57679	2.86618e-07	3.37049e-06
WDR34	ENSG00000119333	2.44436	2.15439	2.85278e-07	3.36142e-06
RP11-973N13.3	ENSG00000259076	1.75074	2.89021	2.79188e-07	3.30208e-06
VAT1	ENSG00000108828	1.90705	2.49546	2.68631e-07	3.182e-06
NEMP2	ENSG00000189362	1.56899	3.33644	2.67666e-07	3.17782e-06
MUC6	ENSG00000184956	1.27432	4.60588	2.50998e-07	3.0027e-06
TMEM150C	ENSG00000249242	1.5977	3.52127	2.49006e-07	2.98267e-06
NASP	ENSG00000132780	1.58633	3.13777	2.44043e-07	2.92696e-06
TFAP2E	ENSG00000116819	1.20578	3.86824	2.43594e-07	2.92531e-06
GALNT11	ENSG00000178234	1.37767	4.1398	2.21716e-07	2.67283e-06
CCDC38	ENSG00000165972	1.62489	3.82619	2.20946e-07	2.66697e-06
INPP5E	ENSG00000148384	1.96866	2.80773	2.11345e-07	2.55436e-06
ALDH1L2	ENSG00000136010	1.27305	4.48837	1.95143e-07	2.36463e-06
TPI1	ENSG00000111669	1.67998	3.03027	1.85565e-07	2.25439e-06
PMCH	ENSG00000183395	-1.0719	5.79515	1.7693e-07	2.15227e-06
MAML1	ENSG00000161021	1.32704	3.77402	1.671e-07	2.03797e-06
RP4-800J21.3	ENSG00000218018	1.4428	4.26246	1.61762e-07	1.97544e-06
TTLL9	ENSG00000131044	1.71124	3.36168	1.58321e-07	1.93593e-06
IGF2BP3	ENSG00000136231	1.44562	3.96266	1.53856e-07	1.88379e-06
ANKHD1-EIF4EBP3	ENSG00000254996	1.75206	3.29732	1.51851e-07	1.86166e-06
CCDC188	ENSG00000234409	2.43604	3.11064	1.42474e-07	1.75127e-06
DNAJC24	ENSG00000170946	2.11571	2.56162	1.33612e-07	1.6445e-06
HSBP1L1	ENSG00000226742	1.2923	3.96004	1.32095e-07	1.62796e-06
SMC1B	ENSG00000077935	1.86704	3.06235	1.2849e-07	1.58561e-06
PEA15	ENSG00000162734	1.08636	4.69072	1.19694e-07	1.47901e-06
ADRM1	ENSG00000130706	1.00523	8.62831	1.12956e-07	1.40314e-06
IKZF5	ENSG00000095574	2.02513	2.54032	1.11521e-07	1.38714e-06
COL6A6	ENSG00000206384	1.5308	3.84142	1.07729e-07	1.34353e-06
BOLL	ENSG00000152430	1.67938	3.38385	1.03927e-07	1.29785e-06
GALNT7	ENSG00000109586	1.2117	4.20631	9.87742e-08	1.23514e-06
GPATCH4	ENSG00000160818	1.02799	4.69443	9.75259e-08	1.22115e-06
CASP8	ENSG00000064012	1.23692	4.23765	9.4941e-08	1.19197e-06
NDUFAF2	ENSG00000164182	1.05275	4.75493	9.35139e-08	1.1772e-06
ZSCAN30	ENSG00000186814	1.52872	3.64168	9.27394e-08	1.16901e-06
WHAMM	ENSG00000156232	2.1206	2.31741	9.2617e-08	1.16901e-06
FAM63B	ENSG00000128923	2.23247	3.17042	9.04074e-08	1.14269e-06
PANO1	ENSG00000274897	1.67146	3.58174	8.23685e-08	1.04389e-06
DNALI1	ENSG00000163879	1.56168	3.37509	8.2351e-08	1.04389e-06
CASQ1	ENSG00000143318	1.97165	3.07905	8.10738e-08	1.03026e-06
ATAD3A	ENSG00000197785	2.15698	2.34293	7.43099e-08	9.45588e-07
KIAA1147	ENSG00000257093	1.43547	4.12242	7.10484e-08	9.06543e-07
OXA1L	ENSG00000155463	2.01156	2.58521	7.03985e-08	9.00698e-07
ADAM22	ENSG00000008277	2.21867	4.38288	6.84671e-08	8.77182e-07
ORMDL1	ENSG00000128699	2.11344	2.42556	6.65444e-08	8.54882e-07
GRTP1	ENSG00000139835	1.15698	4.22403	6.61189e-08	8.50579e-07
EIF3G	ENSG00000130811	1.60772	3.23937	6.22933e-08	8.03567e-07
CTSW	ENSG00000172543	2.1305	2.46661	6.1516e-08	7.94631e-07
CYC1	ENSG00000179091	1.99229	2.97043	6.07707e-08	7.86085e-07
RPRD1A	ENSG00000141425	2.23772	2.84215	5.75355e-08	7.47324e-07
FBXO33	ENSG00000165355	2.26489	2.66654	5.67827e-08	7.38568e-07
GPATCH11	ENSG00000152133	1.25113	4.01302	5.64213e-08	7.34886e-07
ENTPD7	ENSG00000198018	1.24423	3.94525	5.49863e-08	7.17866e-07
CTHRC1	ENSG00000164932	1.58418	3.49635	5.35935e-08	7.0097e-07
ATP8B5P	ENSG00000179766	1.36736	4.07939	5.19669e-08	6.80643e-07
CNTNAP1	ENSG00000108797	1.10782	4.31627	5.18511e-08	6.80075e-07
GABARAPL2	ENSG00000034713	1.67475	3.12911	4.8459e-08	6.38259e-07
GNAT2	ENSG00000134183	1.13966	4.94828	4.82889e-08	6.36912e-07
SCAMP1	ENSG00000085365	1.99144	3.49404	4.77101e-08	6.30162e-07
KAT2B	ENSG00000114166	1.85965	3.47076	4.23232e-08	5.6138e-07
ECT2L	ENSG00000203734	1.48984	3.53659	4.21793e-08	5.60262e-07
PTPN23	ENSG00000076201	1.43101	3.70757	4.12701e-08	5.48963e-07
CACNA1G-AS1	ENSG00000250107	1.4714	3.81418	3.63288e-08	4.84607e-07
WDSUB1	ENSG00000196151	1.2908	4.19689	3.59283e-08	4.79948e-07
IL17B	ENSG00000127743	2.15446	2.59466	3.22322e-08	4.31801e-07
PSMC5	ENSG00000087191	1.38425	3.69819	3.11278e-08	4.17601e-07
MMP25-AS1	ENSG00000261971	2.0458	3.08955	3.08193e-08	4.14055e-07
C9orf16	ENSG00000171159	1.24935	4.01416	2.94408e-08	3.96102e-07
DNAJC5	ENSG00000101152	1.69972	3.22941	2.91917e-08	3.93313e-07
CEP57	ENSG00000166037	1.02219	4.51049	2.78963e-08	3.764e-07
ZBTB17	ENSG00000116809	1.51932	3.75036	2.64305e-08	3.58166e-07
RUFY3	ENSG00000018189	2.21893	2.69941	2.5638e-08	3.48431e-07
IFT46	ENSG00000118096	1.12272	4.30605	2.49403e-08	3.39441e-07
TIPIN	ENSG00000075131	1.95248	2.75188	2.42816e-08	3.31436e-07
RASSF5	ENSG00000266094	1.6656	3.96967	2.17882e-08	2.9827e-07
AC006486.10	ENSG00000279539	1.23049	4.337	2.11069e-08	2.89365e-07
THEMIS2	ENSG00000130775	2.18342	2.45587	2.10916e-08	2.89365e-07
MUC4	ENSG00000145113	1.23143	4.25915	2.06169e-08	2.83475e-07
SMC4	ENSG00000113810	1.06408	4.79442	1.98803e-08	2.73748e-07
NEURL1	ENSG00000107954	1.54109	3.73722	1.9428e-08	2.67912e-07
IFNA1	ENSG00000197919	1.32516	4.25849	1.93871e-08	2.67741e-07
CYP3A4	ENSG00000160868	1.80762	3.29714	1.83355e-08	2.53965e-07
POLR3C	ENSG00000186141	1.78771	3.31061	1.83012e-08	2.53864e-07
AGBL3	ENSG00000146856	1.74071	4.16045	1.70542e-08	2.37621e-07
PI4K2A	ENSG00000155252	1.45883	3.7021	1.60404e-08	2.23827e-07
TMEM175	ENSG00000127419	2.37068	2.28845	1.55536e-08	2.17681e-07
CTSZ	ENSG00000101160	1.91952	3.30712	1.53801e-08	2.15574e-07
RIF1	ENSG00000080345	1.14775	4.76072	1.50622e-08	2.11434e-07
CABLES2	ENSG00000149679	2.12963	2.5203	1.41885e-08	1.99467e-07
RP11-770G2.2	ENSG00000255557	1.05029	4.6372	1.36367e-08	1.91998e-07
FSTL4	ENSG00000053108	1.70756	4.8647	1.33022e-08	1.8757e-07
RP3-453C12.15	ENSG00000277022	1.21423	4.38776	1.3264e-08	1.87312e-07
LMTK3	ENSG00000142235	1.01548	5.16248	1.29401e-08	1.83013e-07
BID	ENSG00000015475	1.3746	3.86003	1.24688e-08	1.76613e-07
YIF1A	ENSG00000174851	2.19682	2.57657	1.21052e-08	1.71722e-07
SSBP3	ENSG00000157216	2.92179	4.09632	1.14283e-08	1.62365e-07
AQP6	ENSG00000086159	1.75289	3.59486	1.13839e-08	1.61979e-07
MNT	ENSG00000070444	1.46402	3.90854	1.01376e-08	1.44464e-07
RFC4	ENSG00000163918	2.23736	2.39294	1.00457e-08	1.43373e-07
RMND1	ENSG00000155906	1.56371	3.57223	9.97252e-09	1.42545e-07
CD74	ENSG00000019582	1.30683	3.98704	8.90529e-09	1.27679e-07
KCTD9	ENSG00000104756	1.02998	4.80729	8.72777e-09	1.25325e-07
RP13-735L24.1	ENSG00000260423	1.10942	4.52346	8.15959e-09	1.17346e-07
UNC5C	ENSG00000182168	1.08142	6.16277	8.05843e-09	1.16069e-07
SLC38A10	ENSG00000157637	1.18703	5.19322	7.85484e-09	1.1331e-07
CLCN3	ENSG00000109572	2.09126	3.20846	7.78982e-09	1.12545e-07
CARS2	ENSG00000134905	1.86166	4.09615	6.99092e-09	1.01158e-07
FABP3	ENSG00000121769	1.05554	4.83691	6.86845e-09	9.95396e-08
KCNK12	ENSG00000184261	1.01464	5.40331	6.57463e-09	9.54287e-08
MAMDC4	ENSG00000177943	2.04871	3.06798	6.54139e-09	9.50931e-08
B3GALNT2	ENSG00000162885	2.3081	3.10137	6.41206e-09	9.33577e-08
CUL1	ENSG00000055130	1.25757	4.43304	6.2199e-09	9.07004e-08
COA3	ENSG00000183978	1.08087	5.93377	6.17406e-09	9.0172e-08
OGFR-AS1	ENSG00000229873	1.12361	4.47641	5.70368e-09	8.36926e-08
KIF24	ENSG00000186638	2.05564	3.6016	5.59986e-09	8.22978e-08
ERCC6L	ENSG00000186871	1.36056	4.0911	5.56079e-09	8.18517e-08
CHTF8	ENSG00000168802	1.65557	3.60596	5.29169e-09	7.80129e-08
CYP11A1	ENSG00000140459	1.79986	3.15911	5.18777e-09	7.66012e-08
RNF167	ENSG00000108523	2.10584	3.01729	5.03426e-09	7.4569e-08
GALNS	ENSG00000141012	1.58987	3.65675	4.85999e-09	7.22154e-08
SYBU	ENSG00000147642	2.35556	3.60575	4.78834e-09	7.12635e-08
BCL9	ENSG00000116128	1.56869	3.96734	4.50592e-09	6.72736e-08
SLC25A22	ENSG00000177542	1.62933	4.31589	4.48313e-09	6.70399e-08
RGMA	ENSG00000182175	2.04106	3.49466	4.44198e-09	6.65305e-08
KIAA0895L	ENSG00000196123	1.27596	4.54983	4.28237e-09	6.42424e-08
ANAPC11	ENSG00000141552	1.09498	6.13512	4.20414e-09	6.31698e-08
BOK	ENSG00000176720	2.05647	2.81717	3.88881e-09	5.85254e-08
HNRNPA3	ENSG00000170144	1.63646	3.6502	3.71424e-09	5.59879e-08
JPH3	ENSG00000154118	1.03811	5.28124	3.6533e-09	5.51578e-08
JAKMIP3	ENSG00000188385	1.47989	3.71404	3.57396e-09	5.40468e-08
SEMA4B	ENSG00000185033	2.39253	3.0691	3.55773e-09	5.38881e-08
WNT4	ENSG00000162552	1.99981	3.34278	3.47002e-09	5.26445e-08
ANKRD42	ENSG00000137494	1.2019	4.8392	3.34812e-09	5.08774e-08
GLT8D1	ENSG00000016864	1.06216	5.41636	3.05708e-09	4.653e-08
NAA20	ENSG00000173418	1.04337	5.6691	3.05609e-09	4.653e-08
PEX5L	ENSG00000114757	1.73894	4.26825	2.86755e-09	4.37873e-08
KIF20A	ENSG00000112984	1.17707	4.39194	2.80118e-09	4.28434e-08
LINC00886	ENSG00000240875	2.10917	3.00009	2.73351e-09	4.18767e-08
POLRMT	ENSG00000099821	1.33148	4.78719	2.63648e-09	4.05225e-08
TLCD1	ENSG00000160606	1.89048	3.29347	2.61181e-09	4.02091e-08
RP11-27K13.3	ENSG00000236137	1.80745	3.43954	2.59832e-09	4.0133e-08
B4GALNT1	ENSG00000135454	1.23346	4.51506	2.27212e-09	3.51523e-08
LACTB	ENSG00000103642	2.05383	3.01654	1.79701e-09	2.78477e-08
RP11-1000B6.2	ENSG00000241818	1.39546	4.37274	1.62675e-09	2.52928e-08
C5orf56	ENSG00000197536	2.23243	3.39228	1.59865e-09	2.48971e-08
ZNF740	ENSG00000139651	1.55421	3.86352	1.57669e-09	2.45959e-08
LHB	ENSG00000104826	1.65781	3.7586	1.57252e-09	2.45715e-08
CCDC84	ENSG00000186166	1.87712	3.17812	1.56709e-09	2.45276e-08
FAM134B	ENSG00000154153	1.68261	3.87045	1.42688e-09	2.23703e-08
MSTO1	ENSG00000125459	1.57413	3.74361	1.38926e-09	2.18169e-08
NAT8L	ENSG00000185818	2.40674	2.57806	1.38222e-09	2.17428e-08
IQSEC3	ENSG00000120645	3.01012	3.9272	1.26585e-09	1.99791e-08
MYH7B	ENSG00000078814	1.24093	5.24719	1.22976e-09	1.94423e-08
SLC45A1	ENSG00000162426	1.96751	3.17883	1.04034e-09	1.6503e-08
SHMT1	ENSG00000176974	1.77886	3.59905	1.02585e-09	1.63007e-08
MYRF	ENSG00000124920	1.03561	5.15763	9.67241e-10	1.54217e-08
ZNF561-AS1	ENSG00000267106	2.19409	2.77805	9.65139e-10	1.54143e-08
RP11-83A24.2	ENSG00000273247	1.31056	4.1618	8.67501e-10	1.39022e-08
CTD-2561B21.5	ENSG00000261924	1.6312	4.21578	8.59114e-10	1.37913e-08
ISLR	ENSG00000129009	1.3685	4.91357	7.86054e-10	1.26401e-08
PGAM5	ENSG00000247077	2.40753	2.3125	7.75891e-10	1.24981e-08
CEP68	ENSG00000011523	1.03139	5.53241	7.64482e-10	1.23355e-08
LOXL4	ENSG00000138131	1.95334	3.30556	7.57248e-10	1.22398e-08
PRKCZ	ENSG00000067606	1.0387	5.49086	6.21744e-10	1.00843e-08
RAD21	ENSG00000164754	2.36262	2.72102	6.11381e-10	9.93336e-09
RFPL3	ENSG00000128276	1.62018	3.72331	5.90843e-10	9.6163e-09
AGPAT1	ENSG00000204310	1.84608	3.23886	5.84945e-10	9.53684e-09
PSTPIP1	ENSG00000140368	2.33958	2.79838	5.28581e-10	8.63287e-09
SLC15A3	ENSG00000110446	1.31516	5.11756	5.27126e-10	8.62411e-09
RADIL	ENSG00000157927	2.36339	3.18341	5.26973e-10	8.62411e-09
PLIN4	ENSG00000167676	1.43608	5.04828	4.93866e-10	8.10821e-09
STKLD1	ENSG00000198870	1.53356	3.81595	4.8484e-10	7.97395e-09
HMGCR	ENSG00000113161	2.25111	2.86886	4.81446e-10	7.93203e-09
CDKN3	ENSG00000100526	2.1978	2.8271	4.75368e-10	7.84566e-09
USP30	ENSG00000135093	2.10851	3.27206	4.6444e-10	7.67879e-09
VWA5B2	ENSG00000145198	2.26169	3.13225	3.93686e-10	6.52047e-09
STX1A	ENSG00000106089	2.20954	2.939	3.40375e-10	5.65745e-09
TBC1D3P1-DHX40P1	ENSG00000267104	1.80053	3.52393	3.3961e-10	5.65475e-09
RP11-403A21.1	ENSG00000265752	1.59534	3.74305	3.34023e-10	5.5716e-09
TM4SF20	ENSG00000168955	2.53393	2.87251	3.32783e-10	5.56079e-09
ALS2CR12	ENSG00000155749	1.3386	4.63984	3.27389e-10	5.48041e-09
REC8	ENSG00000100918	1.46506	4.37731	3.23888e-10	5.43148e-09
FSCN2	ENSG00000186765	2.4559	2.82091	3.11371e-10	5.23093e-09
CORO1B	ENSG00000172725	2.32873	3.13672	3.01402e-10	5.07252e-09
MEGF11	ENSG00000157890	1.5936	5.64199	2.71409e-10	4.58418e-09
LINC01389	ENSG00000225762	1.51372	3.94195	2.68823e-10	4.54868e-09
CLUH	ENSG00000132361	1.67723	4.18138	2.67357e-10	4.53205e-09
HMBOX1	ENSG00000147421	2.03516	4.05408	2.63168e-10	4.4691e-09
LRWD1	ENSG00000161036	2.19373	3.15197	2.20138e-10	3.75875e-09
LRSAM1	ENSG00000148356	1.9503	3.55617	2.06667e-10	3.53518e-09
SPNS2	ENSG00000183018	1.04338	6.55217	1.91494e-10	3.28161e-09
RAI1	ENSG00000108557	2.20018	3.72026	1.81398e-10	3.11428e-09
CCDC150	ENSG00000144395	1.74353	4.36199	1.76365e-10	3.03341e-09
ZDHHC12	ENSG00000160446	2.28029	2.89218	1.75955e-10	3.03192e-09
CNTRL	ENSG00000119397	1.47402	4.20005	1.68745e-10	2.91838e-09
CCL5	ENSG00000271503	2.04702	3.24714	1.64642e-10	2.85269e-09
IRF3	ENSG00000126456	1.40216	4.51437	1.44745e-10	2.51256e-09
E4F1	ENSG00000167967	2.2078	3.90641	1.44476e-10	2.51255e-09
KANK3	ENSG00000186994	1.51482	4.81745	1.42866e-10	2.48916e-09
NAALADL1	ENSG00000168060	2.51313	2.40396	1.19633e-10	2.08823e-09
CDH23	ENSG00000107736	1.1643	8.41201	1.14913e-10	2.00959e-09
DOCK5	ENSG00000147459	2.26699	4.40025	1.10697e-10	1.93947e-09
GRPEL1	ENSG00000109519	2.61168	2.4772	1.04864e-10	1.84071e-09
NOXO1	ENSG00000196408	1.20826	5.82197	9.85597e-11	1.73328e-09
NPSR1	ENSG00000187258	1.52522	4.72948	9.77797e-11	1.72279e-09
RNFT1	ENSG00000189050	1.65972	3.83568	8.34526e-11	1.4759e-09
ZNF711	ENSG00000147180	1.45775	4.11401	7.27985e-11	1.29235e-09
FBXW12	ENSG00000164049	1.52539	4.07825	7.18707e-11	1.27829e-09
DACT3-AS1	ENSG00000245598	1.0776	6.41895	6.62e-11	1.17967e-09
ATE1-AS1	ENSG00000226864	1.48187	4.05367	6.54961e-11	1.16934e-09
ZNF219	ENSG00000165804	1.2148	4.85212	6.22463e-11	1.11344e-09
RBPMS	ENSG00000157110	1.14189	5.67356	6.00523e-11	1.07624e-09
SYNE4	ENSG00000181392	1.65629	3.9301	5.99426e-11	1.07624e-09
RP11-264B17.5	ENSG00000261552	1.29313	5.13993	5.79278e-11	1.04215e-09
PQLC3	ENSG00000162976	1.91651	3.46943	5.62622e-11	1.01412e-09
WDR48	ENSG00000114742	2.27773	3.36826	5.22091e-11	9.42877e-10
VPS54	ENSG00000143952	1.61748	4.60058	4.46252e-11	8.07467e-10
RP5-1029F21.3	ENSG00000263015	2.53956	3.0009	4.41026e-11	7.99551e-10
PFDN1	ENSG00000113068	2.35216	3.1041	4.32067e-11	7.84824e-10
UBAP2	ENSG00000137073	2.79421	4.21047	4.00733e-11	7.29318e-10
TMEM238	ENSG00000233493	2.43743	2.82991	3.86599e-11	7.04961e-10
CRIM1	ENSG00000150938	1.14498	5.66315	3.83765e-11	7.01156e-10
ABTB2	ENSG00000166016	1.20589	6.10054	3.81057e-11	6.97565e-10
ZBTB48	ENSG00000204859	2.20166	3.34456	3.64287e-11	6.68168e-10
ZDHHC16	ENSG00000171307	2.28634	3.38516	3.62144e-11	6.65536e-10
RP11-661A12.9	ENSG00000255050	1.16625	7.98003	3.20209e-11	5.89625e-10
KIAA0196	ENSG00000164961	1.22716	5.03133	2.97395e-11	5.4977e-10
SH2D4A	ENSG00000104611	1.52094	4.40037	2.93792e-11	5.44182e-10
RP11-533E19.2	ENSG00000261831	2.63081	3.18728	2.76724e-11	5.1358e-10
ADA	ENSG00000196839	2.25005	2.93134	2.49423e-11	4.63828e-10
CACFD1	ENSG00000160325	1.79505	3.63891	2.46306e-11	4.5894e-10
RP11-31L22.3	ENSG00000255808	2.63033	3.00386	2.3334e-11	4.35645e-10
CD302	ENSG00000241399	1.53774	4.11573	2.2625e-11	4.2325e-10
LRRN2	ENSG00000170382	1.26785	4.74714	2.23388e-11	4.18729e-10
PRADC1	ENSG00000135617	1.96811	3.43681	2.21433e-11	4.15895e-10
SLC25A18	ENSG00000182902	1.36944	4.35978	2.11419e-11	3.97883e-10
ALAS2	ENSG00000158578	1.90591	3.46079	2.06111e-11	3.88672e-10
ERGIC3	ENSG00000125991	2.17814	3.14753	1.89749e-11	3.58538e-10
BBIP1	ENSG00000214413	1.07634	6.20433	1.8585e-11	3.51879e-10
ANKLE2	ENSG00000176915	2.45012	2.84984	1.7583e-11	3.3358e-10
PSMC3IP	ENSG00000131470	1.05988	6.71855	1.72569e-11	3.28056e-10
SGPL1	ENSG00000166224	1.88655	3.49057	1.65702e-11	3.15641e-10
AC093162.5	ENSG00000246575	2.07752	4.16537	1.5695e-11	2.99577e-10
BTBD2	ENSG00000133243	1.31443	5.57587	1.51272e-11	2.89326e-10
CACNB3	ENSG00000167535	2.15312	3.05408	1.48573e-11	2.84745e-10
CNOT11	ENSG00000158435	1.50077	4.7673	1.4733e-11	2.82941e-10
SGCG	ENSG00000102683	2.39723	3.64489	1.17449e-11	2.26017e-10
AC074011.2	ENSG00000230730	2.64694	3.02063	1.04217e-11	2.00965e-10
DSTN	ENSG00000125868	1.75277	3.70025	9.05151e-12	1.74903e-10
NPB	ENSG00000183979	1.21675	5.55924	8.91328e-12	1.72587e-10
ANKRD27	ENSG00000105186	2.58714	3.51889	8.39895e-12	1.62964e-10
SUPT7L	ENSG00000119760	1.00138	6.4533	8.1427e-12	1.58319e-10
AC005537.2	ENSG00000232006	2.74012	3.70546	7.39818e-12	1.44142e-10
NUDT1	ENSG00000106268	2.47888	2.89049	7.11514e-12	1.38915e-10
EIF2B2	ENSG00000119718	1.14379	5.1438	6.57708e-12	1.28678e-10
CCNB2	ENSG00000157456	1.10014	5.11785	6.48134e-12	1.27069e-10
RP11-456N14.4	ENSG00000283148	2.09494	3.64268	5.21374e-12	1.02646e-10
NADK2	ENSG00000152620	1.11551	5.13536	5.05603e-12	9.97503e-11
GZF1	ENSG00000125812	1.52986	4.12914	4.66452e-12	9.222e-11
BUD31	ENSG00000106245	1.10495	5.81277	4.37815e-12	8.6741e-11
AFF4	ENSG00000072364	1.70349	3.96355	4.29689e-12	8.5311e-11
TROVE2	ENSG00000116747	1.41521	4.55124	3.2194e-12	6.40537e-11
CCDC189	ENSG00000196118	1.24461	5.69282	3.17932e-12	6.33907e-11
SFT2D3	ENSG00000173349	1.18438	5.12682	2.98971e-12	5.97369e-11
LIMK2	ENSG00000182541	1.57211	4.1193	2.81946e-12	5.64554e-11
NRG4	ENSG00000169752	1.03492	8.15979	2.48436e-12	4.98517e-11
RNPEPL1	ENSG00000142327	2.40144	3.32763	2.35747e-12	4.74068e-11
RP11-514P8.2	ENSG00000239480	1.85512	3.70362	2.32393e-12	4.68327e-11
PRPF38A	ENSG00000134748	2.78097	2.51818	2.07463e-12	4.18986e-11
TRMU	ENSG00000100416	1.21255	6.20643	1.69785e-12	3.43632e-11
LILRB3	ENSG00000204577	1.83876	3.91803	1.65262e-12	3.35199e-11
TIMM23	ENSG00000265354	2.41853	2.91034	1.48776e-12	3.02414e-11
KANTR	ENSG00000232593	2.05794	3.37841	1.47649e-12	3.00775e-11
VASH2	ENSG00000143494	2.15516	3.28388	1.47267e-12	3.00649e-11
NAPEPLD	ENSG00000161048	1.1265	6.25689	1.2603e-12	2.58416e-11
GRIN3A	ENSG00000198785	1.48167	4.86536	1.22931e-12	2.52614e-11
BRAF	ENSG00000157764	1.5779	4.82651	1.16551e-12	2.40028e-11
SLC48A1	ENSG00000211584	2.07517	3.5679	1.14096e-12	2.35489e-11
NTAN1	ENSG00000157045	2.38813	3.05595	1.06334e-12	2.19951e-11
MOCS2	ENSG00000164172	1.64951	3.98753	1.05612e-12	2.18941e-11
ITGB7	ENSG00000139626	1.12064	5.51899	1.02685e-12	2.13345e-11
FAM208B	ENSG00000108021	1.4396	4.55816	9.92037e-13	2.06568e-11
SLC31A2	ENSG00000136867	1.25292	4.83694	9.05072e-13	1.88878e-11
DNASE1L1	ENSG00000013563	1.31358	5.34653	8.45389e-13	1.76816e-11
ZHX3	ENSG00000174306	2.38651	4.34101	7.16362e-13	1.50164e-11
PNO1	ENSG00000115946	2.1978	3.39227	7.03645e-13	1.47828e-11
RP11-108P20.2	ENSG00000267501	2.5834	3.18123	6.9479e-13	1.46295e-11
GNPDA1	ENSG00000113552	1.27794	4.92788	6.70835e-13	1.41569e-11
LINC00083	ENSG00000188585	1.98021	3.52286	6.63162e-13	1.40265e-11
PCGF1	ENSG00000115289	2.16542	3.3371	6.35376e-13	1.34691e-11
UCKL1	ENSG00000198276	2.90886	3.62482	5.78244e-13	1.22857e-11
C1QBP	ENSG00000108561	1.85059	3.62134	5.67535e-13	1.20855e-11
RPGRIP1	ENSG00000092200	1.53129	4.48	5.62347e-13	1.20023e-11
RP1-197B17.3	ENSG00000257433	2.6048	3.80254	5.22689e-13	1.11812e-11
GDF11	ENSG00000135414	1.25594	5.07522	5.08534e-13	1.09033e-11
RASGRP1	ENSG00000172575	1.58039	4.21364	4.59322e-13	9.8707e-12
GRIN3B	ENSG00000116032	1.70675	6.18502	4.43687e-13	9.55658e-12
SRPRA	ENSG00000182934	1.50703	4.2613	4.01307e-13	8.66362e-12
ABR	ENSG00000159842	1.47555	6.34638	3.99568e-13	8.64596e-12
TMCO6	ENSG00000113119	2.26949	3.50084	3.35932e-13	7.28577e-12
NMT1	ENSG00000136448	1.11613	5.74177	3.28358e-13	7.13799e-12
LAMB1	ENSG00000091136	1.2143	5.06836	3.2019e-13	6.97657e-12
ABHD12B	ENSG00000131969	1.29824	5.00287	3.05214e-13	6.66574e-12
DRC3	ENSG00000171962	1.13656	6.21224	2.98342e-13	6.53083e-12
ST3GAL2	ENSG00000157350	1.26627	5.00601	2.81407e-13	6.17453e-12
ACSS2	ENSG00000131069	1.14127	5.32944	2.48384e-13	5.46271e-12
RP5-1029K10.2	ENSG00000249906	1.96321	4.38401	2.42786e-13	5.35212e-12
ROM1	ENSG00000149489	1.86836	4.90765	2.27956e-13	5.03701e-12
XRCC3	ENSG00000126215	1.29057	7.19088	1.88039e-13	4.1648e-12
CMTM4	ENSG00000183723	2.07968	3.99715	1.87766e-13	4.1648e-12
STAU2-AS1	ENSG00000253302	1.52726	4.62106	1.77747e-13	3.9555e-12
RP11-277A4.4	ENSG00000203325	1.23604	5.3518	1.73806e-13	3.87699e-12
PAF1	ENSG00000006712	1.7233	4.01359	1.72788e-13	3.86345e-12
RP11-862L9.3	ENSG00000266844	2.17704	3.58337	1.48129e-13	3.31999e-12
RP11-50C13.1	ENSG00000259250	1.02337	6.34507	1.47278e-13	3.30883e-12
PDSS1	ENSG00000148459	2.4484	3.2559	1.37481e-13	3.09613e-12
NUDT5	ENSG00000165609	1.44559	4.65072	1.34971e-13	3.0469e-12
DNAH1	ENSG00000114841	1.91845	4.0816	1.14002e-13	2.57973e-12
RP4-622L5.7	ENSG00000224066	1.4712	5.053	9.84049e-14	2.23218e-12
ST5	ENSG00000166444	1.63148	5.2262	9.42739e-14	2.14365e-12
MYH10	ENSG00000133026	1.17032	6.73904	8.98547e-14	2.04812e-12
NAXD	ENSG00000213995	2.56543	3.01197	8.7834e-14	2.00693e-12
CHPT1	ENSG00000111666	1.80457	4.12484	8.59178e-14	1.96794e-12
COX7A2L	ENSG00000115944	2.78045	4.0247	7.78333e-14	1.78712e-12
WI2-85898F10.1	ENSG00000235091	2.33358	3.59876	7.60295e-14	1.74998e-12
MYLK3	ENSG00000140795	2.97428	3.6694	7.43776e-14	1.71617e-12
TBX1	ENSG00000184058	1.64255	4.32348	6.79381e-14	1.57144e-12
SGCE	ENSG00000127990	2.34537	3.92687	5.44635e-14	1.26288e-12
AC007193.6	ENSG00000267922	1.08816	7.9264	4.82685e-14	1.122e-12
PCYOX1	ENSG00000116005	1.34359	4.97226	4.74774e-14	1.10635e-12
SBNO2	ENSG00000064932	3.03583	3.6774	4.72223e-14	1.10315e-12
NEK4	ENSG00000114904	1.6598	4.36459	4.66631e-14	1.0928e-12
SLC47A2	ENSG00000180638	1.07725	6.3116	3.85625e-14	9.05351e-13
GPM6B	ENSG00000046653	1.12224	6.33871	3.57345e-14	8.4106e-13
LRRN4	ENSG00000125872	2.6073	3.25323	3.35534e-14	7.91709e-13
C1orf146	ENSG00000203910	2.78269	2.81245	3.31593e-14	7.8438e-13
NDRG4	ENSG00000103034	1.70952	4.80318	3.17268e-14	7.5239e-13
MASP2	ENSG00000009724	1.10903	5.96254	2.94265e-14	6.99606e-13
XYLT2	ENSG00000015532	1.5544	4.74389	2.74949e-14	6.55342e-13
UGP2	ENSG00000169764	1.87342	3.90934	2.66412e-14	6.3661e-13
COL17A1	ENSG00000065618	2.86296	3.18484	2.64777e-14	6.34317e-13
PRELID1	ENSG00000169230	2.24279	3.432	2.21378e-14	5.31703e-13
SASH3	ENSG00000122122	2.80235	2.88653	1.86635e-14	4.49409e-13
PPM1E	ENSG00000175175	1.45601	4.79608	1.7426e-14	4.20688e-13
CLCN2	ENSG00000114859	2.74776	3.04548	1.60179e-14	3.87691e-13
IGLON5	ENSG00000142549	1.49704	5.10191	1.48267e-14	3.59787e-13
PUSL1	ENSG00000169972	2.9783	3.73794	1.47095e-14	3.57868e-13
KIAA1614	ENSG00000135835	1.30984	5.60411	1.15584e-14	2.81936e-13
MAST2	ENSG00000086015	1.74417	4.78484	1.113e-14	2.72192e-13
USP24	ENSG00000162402	2.48778	4.24017	8.85918e-15	2.17223e-13
CSPP1	ENSG00000104218	1.2543	5.64353	8.09175e-15	1.98926e-13
ANO9	ENSG00000185101	1.92707	4.99425	7.11844e-15	1.75457e-13
WNT8B	ENSG00000075290	1.76985	4.12018	7.11452e-15	1.75457e-13
NDUFS7	ENSG00000115286	1.44265	4.75939	6.86674e-15	1.70147e-13
CTC-459F4.5	ENSG00000266977	1.91417	4.18406	6.47228e-15	1.60797e-13
TCF19	ENSG00000137310	1.32269	5.19407	6.18053e-15	1.53956e-13
RUNDC3A	ENSG00000108309	2.62399	3.1765	5.71768e-15	1.42805e-13
R3HCC1	ENSG00000104679	1.40285	5.50968	5.67689e-15	1.42164e-13
RP11-146E13.4	ENSG00000277128	1.16106	6.0673	5.60844e-15	1.40826e-13
FBXO41	ENSG00000163013	2.38754	3.70405	5.50809e-15	1.38677e-13
ZBTB46	ENSG00000130584	1.17355	7.22117	5.45615e-15	1.37738e-13
DOT1L	ENSG00000104885	1.76544	5.16386	4.86846e-15	1.23234e-13
RP11-659E9.2	ENSG00000240915	2.99443	2.74955	4.46102e-15	1.13226e-13
PPP2R2D	ENSG00000175470	2.78626	3.50945	3.93174e-15	1.00062e-13
ZNF692	ENSG00000171163	2.63035	3.38701	2.90312e-15	7.40848e-14
COPG2	ENSG00000158623	1.41614	5.68873	2.22385e-15	5.69051e-14
FHL2	ENSG00000115641	2.36761	4.09435	2.14067e-15	5.49262e-14
SEC24D	ENSG00000150961	1.4142	4.93283	1.77298e-15	4.56167e-14
NUTM2G	ENSG00000188152	1.71213	5.05763	1.71787e-15	4.43202e-14
NLRP9	ENSG00000185792	1.90278	4.09971	1.58597e-15	4.10298e-14
COA6	ENSG00000168275	2.61484	3.16177	1.58345e-15	4.10298e-14
SDCBP	ENSG00000137575	1.82478	4.49645	1.54037e-15	4.0071e-14
PLCD3	ENSG00000161714	2.82287	3.50157	1.51223e-15	3.94482e-14
TBP	ENSG00000112592	2.85942	2.94615	1.49839e-15	3.9196e-14
PDE8B	ENSG00000113231	1.22756	5.98865	1.30683e-15	3.42806e-14
PROZ	ENSG00000126231	1.5527	5.80947	1.26436e-15	3.32593e-14
LONP1	ENSG00000196365	2.25932	4.04355	9.36394e-16	2.47013e-14
SELO	ENSG00000073169	1.22733	6.22477	8.30632e-16	2.19731e-14
MROH1	ENSG00000179832	1.69567	6.4987	7.89947e-16	2.09559e-14
ZNF285B	ENSG00000176761	1.94736	3.91134	7.84685e-16	2.08753e-14
MASTL	ENSG00000120539	1.64593	4.42337	6.10447e-16	1.62861e-14
TADA1	ENSG00000152382	1.48584	5.09979	6.00609e-16	1.60693e-14
DAAM1	ENSG00000100592	1.1132	6.88318	5.68083e-16	1.52425e-14
STAB2	ENSG00000136011	1.21334	6.02834	5.17271e-16	1.39189e-14
SLC7A10	ENSG00000130876	2.5976	4.17376	4.75197e-16	1.28235e-14
CPM	ENSG00000135678	1.23787	8.43008	4.57732e-16	1.23878e-14
STX17	ENSG00000136874	1.87335	4.1715	3.70719e-16	1.00619e-14
SYNM	ENSG00000182253	1.54129	4.84729	3.60428e-16	9.81095e-15
GNG3	ENSG00000162188	1.42025	4.9361	3.45076e-16	9.42037e-15
RP5-1024G6.5	ENSG00000226754	1.32078	6.0693	3.19728e-16	8.75385e-15
ADCK5	ENSG00000173137	3.02652	3.24612	2.87766e-16	7.90178e-15
TMEM181	ENSG00000146433	2.38024	4.63681	2.74262e-16	7.55307e-15
MBTD1	ENSG00000011258	2.24756	3.89492	2.64306e-16	7.30029e-15
ZFHX2	ENSG00000136367	2.59773	3.38489	2.51684e-16	6.97216e-15
CCDC106	ENSG00000173581	2.1164	4.09401	2.37318e-16	6.59366e-15
BBS4	ENSG00000140463	1.34544	5.08259	2.3185e-16	6.46085e-15
IMPDH2	ENSG00000178035	1.2342	5.8627	2.31587e-16	6.46085e-15
PPWD1	ENSG00000113593	1.82616	4.16409	2.14864e-16	6.02324e-15
DCST2	ENSG00000163354	2.84043	3.68519	1.88844e-16	5.30969e-15
COQ8A	ENSG00000163050	2.53334	3.95119	1.62972e-16	4.59602e-15
BMP8B	ENSG00000116985	1.50847	5.25896	1.47903e-16	4.1836e-15
RP11-1334A24.6	ENSG00000248996	1.25826	7.78429	1.27259e-16	3.61054e-15
PROCA1	ENSG00000167525	2.81979	3.33202	1.03589e-16	2.94789e-15
TP53BP2	ENSG00000143514	2.64618	3.4413	1.01854e-16	2.90733e-15
MAN1B1	ENSG00000177239	1.86535	4.45795	9.1481e-17	2.6192e-15
SURF4	ENSG00000148248	1.82021	4.57539	8.36627e-17	2.40268e-15
GIT1	ENSG00000108262	1.77241	4.44783	8.34707e-17	2.40268e-15
DNAH7	ENSG00000118997	2.38177	5.26915	7.99043e-17	2.30887e-15
EDC3	ENSG00000179151	1.83173	4.79128	7.28421e-17	2.1113e-15
HOXB-AS1	ENSG00000230148	1.51126	4.90878	6.76019e-17	1.96548e-15
CPSF3	ENSG00000119203	1.89046	4.2523	5.94159e-17	1.73284e-15
TADA2B	ENSG00000173011	2.11663	3.77529	5.84462e-17	1.70987e-15
DHRS7	ENSG00000100612	1.49723	4.86079	5.73361e-17	1.68264e-15
PDZK1	ENSG00000174827	1.57435	4.94329	5.52453e-17	1.62636e-15
NCBP2	ENSG00000114503	2.19112	3.66236	5.07082e-17	1.49749e-15
TAF9B	ENSG00000187325	1.23323	6.93897	4.36399e-17	1.29281e-15
CTB-33O18.3	ENSG00000253955	2.75925	3.49448	4.17846e-17	1.24177e-15
IMMT	ENSG00000132305	1.65711	4.72529	4.13619e-17	1.23311e-15
SCAP	ENSG00000114650	2.53782	3.76202	3.78254e-17	1.13127e-15
NECAB1	ENSG00000123119	1.69938	5.04462	3.45997e-17	1.0381e-15
MTMR7	ENSG00000003987	1.2881	6.1147	2.99109e-17	9.003e-16
SOD1	ENSG00000142168	1.52544	4.69496	2.2692e-17	6.85211e-16
TNS4	ENSG00000131746	1.37791	5.80526	2.20514e-17	6.68017e-16
PRRC2A	ENSG00000204469	2.3519	3.55952	2.06796e-17	6.28486e-16
MANSC4	ENSG00000205693	2.90585	3.31574	1.85065e-17	5.64267e-16
LRRC71	ENSG00000160838	1.94765	4.94728	1.74415e-17	5.33529e-16
PITRM1	ENSG00000107959	1.22428	6.02057	1.509e-17	4.63104e-16
TTPAL	ENSG00000124120	1.82256	4.25453	1.22655e-17	3.77656e-16
MAPK8IP3	ENSG00000138834	2.58283	4.22834	1.00052e-17	3.09076e-16
SON	ENSG00000159140	1.61003	4.98477	8.52742e-18	2.64294e-16
SWT1	ENSG00000116668	1.78185	4.7217	7.51776e-18	2.33773e-16
HAS1	ENSG00000105509	1.95474	4.5962	5.67367e-18	1.77015e-16
KRT87P	ENSG00000135477	1.21584	8.6556	5.66415e-18	1.77015e-16
RP11-290L1.2	ENSG00000257839	2.84949	3.31446	5.65164e-18	1.77015e-16
LIAS	ENSG00000121897	2.10671	4.22871	5.25698e-18	1.65665e-16
RECQL5	ENSG00000108469	1.51743	5.74385	4.96983e-18	1.57144e-16
CTD-2560E9.3	ENSG00000254664	1.26438	6.26254	4.33619e-18	1.37572e-16
ITGA2	ENSG00000164171	2.00252	4.41629	4.1491e-18	1.32082e-16
NDUFAB1	ENSG00000004779	3.28878	3.12144	3.78264e-18	1.20826e-16
KRT81	ENSG00000205426	1.85548	4.5146	3.43895e-18	1.10222e-16
FAM69B	ENSG00000165716	1.99371	7.14234	2.95503e-18	9.50367e-17
SGSM3	ENSG00000100359	1.30127	7.12631	2.59913e-18	8.38777e-17
NUP210L	ENSG00000143552	1.72851	4.88024	2.46578e-18	7.98488e-17
SLC7A7	ENSG00000155465	2.34128	4.02499	2.44187e-18	7.93481e-17
SMU1	ENSG00000122692	2.99361	3.15393	2.14551e-18	6.99599e-17
PEAR1	ENSG00000187800	2.62279	3.6379	2.08251e-18	6.81424e-17
RP11-655M14.13	ENSG00000255318	2.85455	3.30088	1.60716e-18	5.27723e-17
WDR46	ENSG00000227057	2.90954	3.51054	1.52064e-18	5.01066e-17
SULT2B1	ENSG00000088002	2.99716	3.29731	1.44277e-18	4.7708e-17
SLC26A3	ENSG00000091138	3.05162	3.32615	9.8742e-19	3.27663e-17
ATL1	ENSG00000198513	1.6691	4.97782	9.67602e-19	3.22225e-17
THUMPD3	ENSG00000134077	1.28924	6.48114	8.76847e-19	2.93042e-17
IGFL1P1	ENSG00000268879	1.82698	4.76947	8.60521e-19	2.88613e-17
TBC1D20	ENSG00000125875	2.75493	3.39573	8.39156e-19	2.82456e-17
PHF1	ENSG00000112511	3.01665	3.27849	8.3398e-19	2.81723e-17
XPA	ENSG00000136936	1.27948	6.3381	7.10623e-19	2.40919e-17
NIT2	ENSG00000114021	1.62623	5.21721	7.00018e-19	2.38184e-17
AIMP2	ENSG00000106305	1.2042	6.68738	6.4565e-19	2.20484e-17
MROH2A	ENSG00000185038	1.93003	4.32453	5.93559e-19	2.03435e-17
CTU2	ENSG00000174177	1.88523	5.11305	5.87424e-19	2.0207e-17
ADCY5	ENSG00000173175	2.35661	4.91653	5.84416e-19	2.01774e-17
SPINK4	ENSG00000122711	2.90757	3.51742	5.4471e-19	1.88759e-17
RNF24	ENSG00000101236	1.2037	7.50016	5.25422e-19	1.8275e-17
ITIH2	ENSG00000151655	2.29905	3.85866	4.34045e-19	1.51529e-17
OVOS2	ENSG00000177359	1.63387	4.76948	4.24547e-19	1.48766e-17
ARNTL	ENSG00000133794	1.60173	5.54255	4.21002e-19	1.48076e-17
APPL2	ENSG00000136044	1.64797	5.37045	3.88753e-19	1.37247e-17
PKD1L3	ENSG00000277481	1.62002	4.93081	3.87901e-19	1.37247e-17
RP11-599J14.2	ENSG00000256673	2.91386	3.43812	2.67625e-19	9.51993e-18
SOX15	ENSG00000129194	2.08465	5.59984	2.09151e-19	7.4682e-18
GLRA1	ENSG00000145888	1.77446	4.81163	2.00636e-19	7.1915e-18
PAX6	ENSG00000007372	1.9318	4.27515	1.99143e-19	7.16534e-18
ERN2	ENSG00000134398	2.46633	3.927	1.30343e-19	4.70788e-18
SERINC4	ENSG00000184716	1.6944	5.15298	1.25932e-19	4.56612e-18
SLC2A12	ENSG00000146411	2.65608	3.78719	1.13156e-19	4.11881e-18
RAD52	ENSG00000002016	2.23865	4.29419	1.02907e-19	3.7603e-18
USP49	ENSG00000164663	2.24634	4.77813	1.01504e-19	3.72352e-18
CTC-308K20.1	ENSG00000204758	2.05229	4.04502	9.40124e-20	3.46224e-18
NUTM1	ENSG00000184507	2.00617	4.87654	7.81121e-20	2.88799e-18
SLC9A2	ENSG00000115616	3.18215	3.85584	7.53884e-20	2.79831e-18
VPS37B	ENSG00000139722	3.09505	3.4609	5.69543e-20	2.12245e-18
RP11-504P24.5	ENSG00000229930	2.36666	3.97953	5.42712e-20	2.03052e-18
APTR	ENSG00000214293	1.77523	4.82182	5.31578e-20	1.99682e-18
CTSB	ENSG00000164733	1.58633	5.26813	5.24124e-20	1.97673e-18
ISM1	ENSG00000101230	2.14685	4.31817	5.00897e-20	1.89674e-18
RMDN1	ENSG00000176623	1.49835	5.44971	4.40376e-20	1.67432e-18
CTD-2530N21.4	ENSG00000254064	1.43377	5.60022	4.35653e-20	1.6631e-18
JAM2	ENSG00000154721	2.39805	4.6309	4.05099e-20	1.55277e-18
ZSWIM4	ENSG00000132003	3.18255	3.29952	3.18133e-20	1.22442e-18
KLB	ENSG00000134962	2.6056	3.69515	3.12286e-20	1.20686e-18
ASAP2	ENSG00000151693	1.45408	5.65814	2.7728e-20	1.07601e-18
RP11-677M14.3	ENSG00000250073	2.27339	4.22913	2.77085e-20	1.07601e-18
GSDMD	ENSG00000104518	1.93774	6.47568	2.56104e-20	1.00211e-18
SNW1	ENSG00000100603	1.73222	5.06013	2.5447e-20	9.99886e-19
AP3M1	ENSG00000185009	1.92161	4.73533	2.28126e-20	9.00139e-19
HIRIP3	ENSG00000149929	1.72922	7.1162	2.2291e-20	8.83268e-19
THOC1	ENSG00000079134	2.26596	3.92205	2.12802e-20	8.46791e-19
NIF3L1	ENSG00000196290	2.37502	3.84279	1.91074e-20	7.63566e-19
NFE2L2	ENSG00000116044	2.32054	4.03081	1.52052e-20	6.10222e-19
HDAC1	ENSG00000116478	2.53489	3.70562	1.37141e-20	5.52745e-19
KDELR3	ENSG00000100196	2.49211	3.77598	1.24692e-20	5.04733e-19
IL12RB2	ENSG00000081985	1.56958	5.11701	6.78305e-21	2.75756e-19
TOR3A	ENSG00000186283	2.10599	4.9331	5.98287e-21	2.44283e-19
KLF9	ENSG00000119138	2.41194	4.02077	5.7269e-21	2.34853e-19
NEK6	ENSG00000119408	2.85312	4.16609	5.65062e-21	2.32741e-19
RP11-296E7.1	ENSG00000218418	2.34708	3.82877	5.13139e-21	2.12286e-19
CFAP36	ENSG00000163001	1.53208	5.78451	4.77786e-21	1.98535e-19
RANBP9	ENSG00000010017	1.56271	5.13425	4.17712e-21	1.74344e-19
BORA	ENSG00000136122	1.49877	5.43505	2.47432e-21	1.03734e-19
NUDT4	ENSG00000173598	2.01259	4.68541	2.4162e-21	1.01751e-19
ADCY7	ENSG00000121281	1.44733	6.2713	2.00676e-21	8.48894e-20
TEX2	ENSG00000136478	1.56656	5.5669	1.88114e-21	7.99357e-20
STK32C	ENSG00000165752	1.92688	5.26938	1.44877e-21	6.18429e-20
FAM150B	ENSG00000189292	3.47232	3.47662	1.37387e-21	5.89133e-20
HIF1A	ENSG00000100644	2.67242	3.84616	1.19556e-21	5.15025e-20
HEATR9	ENSG00000270379	2.22843	4.39268	9.47409e-22	4.10005e-20
RP11-685M7.3	ENSG00000246308	2.61774	4.17094	8.72502e-22	3.79336e-20
AC005324.6	ENSG00000233002	2.77582	3.78811	5.35529e-22	2.33914e-20
ANKH	ENSG00000154122	1.33144	7.2181	5.32161e-22	2.33529e-20
AP1S2	ENSG00000182287	1.91999	4.57419	5.31817e-22	2.33529e-20
PARD6G	ENSG00000178184	1.63195	5.69695	4.9828e-22	2.20724e-20
CTA-246H3.8	ENSG00000230637	1.71349	4.93282	4.31898e-22	1.92225e-20
MGC16275	ENSG00000246731	2.1553	4.45131	4.12169e-22	1.84318e-20
BAIAP2L1	ENSG00000006453	2.14254	5.50771	3.70056e-22	1.66277e-20
CTSH	ENSG00000103811	1.91442	4.73605	2.83363e-22	1.27936e-20
ZNF385C	ENSG00000187595	2.05303	4.42949	2.27795e-22	1.03344e-20
TMEM164	ENSG00000157600	3.16835	3.58658	1.51144e-22	6.89025e-21
IL21R	ENSG00000103522	2.54068	4.14142	1.28322e-22	5.87842e-21
PDE6C	ENSG00000095464	1.56743	5.58852	1.26999e-22	5.84633e-21
SUSD5	ENSG00000173705	2.08678	4.56064	1.09676e-22	5.07375e-21
TACR2	ENSG00000075073	2.42304	3.92453	1.06299e-22	4.94185e-21
PLAC9	ENSG00000189129	3.13175	3.73743	1.04676e-22	4.89061e-21
RICTOR	ENSG00000164327	2.77709	4.38964	7.45772e-23	3.50177e-21
KCNT1	ENSG00000107147	3.27595	4.22529	6.0612e-23	2.86034e-21
RP11-169K16.4	ENSG00000224459	2.65562	3.96191	3.78372e-23	1.79459e-21
RASGRP3	ENSG00000152689	1.70746	5.44342	2.79438e-23	1.33208e-21
EDF1	ENSG00000107223	3.48473	4.3525	2.68669e-23	1.28728e-21
RFTN2	ENSG00000162944	2.16314	5.65072	2.07777e-23	1.00063e-21
ANKZF1	ENSG00000163516	2.69652	3.80231	1.67603e-23	8.11321e-22
CTB-33G10.6	ENSG00000268677	1.84528	7.15111	1.52766e-23	7.43331e-22
PODXL	ENSG00000128567	2.07977	4.78984	1.50191e-23	7.34604e-22
BRAT1	ENSG00000106009	2.27893	4.46151	1.44935e-23	7.12611e-22
IER2	ENSG00000160888	3.51943	3.5531	1.13655e-23	5.61755e-22
CDK11B	ENSG00000248333	2.52333	4.45034	1.05714e-23	5.2527e-22
MFSD4A	ENSG00000174514	2.03036	5.4517	1.05619e-23	5.2527e-22
PNRC2	ENSG00000189266	2.8751	3.64405	1.02318e-23	5.13835e-22
HOMER2	ENSG00000103942	3.11883	4.67913	1.01712e-23	5.13535e-22
KCNH3	ENSG00000135519	1.79601	5.69158	6.93074e-24	3.51819e-22
SETDB1	ENSG00000143379	1.60676	5.6816	5.94462e-24	3.03402e-22
RP11-1060J15.4	ENSG00000256377	1.99986	4.74103	5.64183e-24	2.89521e-22
ST6GALNAC2	ENSG00000070731	2.42078	4.51034	4.63031e-24	2.38919e-22
CD160	ENSG00000117281	1.65226	5.64819	4.36779e-24	2.26618e-22
NAB2	ENSG00000166886	1.96169	5.02161	3.95573e-24	2.06379e-22
AKAP9	ENSG00000127914	1.98248	5.55831	2.50114e-24	1.31219e-22
RP11-386G11.3	ENSG00000258283	3.30861	3.37383	1.94482e-24	1.02606e-22
BICDL2	ENSG00000162069	3.34785	3.95409	1.67257e-24	8.87407e-23
F10	ENSG00000126218	3.32695	3.74132	1.58628e-24	8.46407e-23
TK1	ENSG00000167900	2.06597	4.48253	1.05464e-24	5.65948e-23
AL356053.1	ENSG00000150076	1.55481	6.61598	9.53735e-25	5.14743e-23
SLC8B1	ENSG00000089060	1.69856	5.83394	7.20238e-25	3.90969e-23
RP11-234B24.2	ENSG00000255474	3.23267	3.51778	5.03656e-25	2.7499e-23
BOC	ENSG00000144857	2.56891	4.89773	4.89738e-25	2.68955e-23
GOLGA2	ENSG00000167110	2.22274	4.47181	4.54936e-25	2.51312e-23
NRDC	ENSG00000078618	1.73071	5.58937	3.15835e-25	1.75503e-23
RBCK1	ENSG00000125826	2.5286	4.12658	2.99443e-25	1.67385e-23
HCFC1R1	ENSG00000103145	2.21898	5.5819	2.19001e-25	1.23152e-23
TTC23	ENSG00000103852	1.71945	5.62409	1.84432e-25	1.04337e-23
EIF2AK4	ENSG00000128829	1.63996	5.60938	1.62794e-25	9.26544e-24
CCDC78	ENSG00000162004	2.63443	6.16042	1.2698e-25	7.27114e-24
NGEF	ENSG00000066248	2.09496	6.81568	1.21048e-25	6.97397e-24
FKBP9	ENSG00000122642	2.09772	4.89269	8.10993e-26	4.70126e-24
GPR161	ENSG00000143147	2.88891	4.59891	5.13004e-26	2.99231e-24
EHBP1L1	ENSG00000173442	3.45314	3.74029	4.81503e-26	2.82612e-24
MPHOSPH8	ENSG00000196199	1.42352	6.69329	3.26653e-26	1.92931e-24
SGSM2	ENSG00000141258	1.89273	5.48847	2.16349e-26	1.28591e-24
SIGLEC16	ENSG00000161643	2.93748	4.06671	2.01208e-26	1.20353e-24
ACTL6A	ENSG00000136518	1.85792	5.24438	1.99259e-26	1.19952e-24
PXK	ENSG00000168297	1.5407	6.3697	1.65089e-26	1.00023e-24
ADAMTSL4	ENSG00000143382	3.40103	5.44742	1.36125e-26	8.30097e-25
UNK	ENSG00000132478	3.12129	3.99771	1.11013e-26	6.81386e-25
TIMM8B	ENSG00000150779	2.37566	4.20319	9.45717e-27	5.84291e-25
FKBP3	ENSG00000100442	2.66329	4.20439	8.23681e-27	5.12264e-25
SPHK2	ENSG00000063176	2.24054	4.66714	7.84881e-27	4.91388e-25
RP11-388C12.5	ENSG00000263321	1.95759	6.18374	4.80987e-27	3.03151e-25
PRICKLE1	ENSG00000139174	4.25606	5.1973	4.22171e-27	2.67879e-25
MIR4496	ENSG00000257221	3.69746	3.74127	3.33317e-28	2.12937e-26
GALM	ENSG00000143891	1.65595	5.96869	2.55961e-28	1.64639e-26
ZCCHC14	ENSG00000140948	2.92265	3.90495	2.31586e-28	1.49988e-26
JAZF1	ENSG00000153814	1.81122	6.15924	1.68231e-28	1.09713e-26
BICDL1	ENSG00000135127	2.96969	4.47663	1.54454e-28	1.01432e-26
EIF5A	ENSG00000132507	1.80552	5.62556	1.3178e-28	8.71512e-27
LMOD1	ENSG00000163431	2.0998	5.25817	1.23508e-28	8.22599e-27
REC114	ENSG00000183324	2.71168	5.03126	8.83964e-29	5.92951e-27
RP11-192H23.5	ENSG00000265168	2.43197	5.70347	5.16537e-29	3.48979e-27
ADRA1D	ENSG00000171873	2.05376	4.92144	3.66176e-29	2.49185e-27
NUDCD2	ENSG00000170584	1.88186	5.48044	2.86042e-29	1.96075e-27
LEO1	ENSG00000166477	1.97443	5.20917	2.69156e-29	1.85856e-27
XPO5	ENSG00000124571	2.05504	4.92955	2.18104e-29	1.5172e-27
FAM83H-AS1	ENSG00000203499	2.45355	4.44206	1.92509e-29	1.34914e-27
TRPC7	ENSG00000069018	2.19772	5.60089	1.71232e-29	1.20905e-27
NAALAD2	ENSG00000077616	1.58875	7.15095	1.24681e-29	8.87032e-28
CTB-60B18.10	ENSG00000268655	2.28039	5.26066	9.57858e-30	6.8666e-28
PLEKHG2	ENSG00000090924	3.55289	3.70017	9.51819e-30	6.8666e-28
RGS20	ENSG00000147509	2.01823	5.43483	6.7052e-30	4.88128e-28
TMEM198	ENSG00000188760	3.66473	3.9066	6.51936e-30	4.78307e-28
SLC23A1	ENSG00000170482	2.63079	4.45391	5.61131e-30	4.14928e-28
USP42	ENSG00000106346	3.71858	4.02792	5.04317e-30	3.75876e-28
PAPSS2	ENSG00000198682	2.25749	4.99023	3.89231e-30	2.92422e-28
CEP95	ENSG00000258890	2.4719	4.72181	2.94402e-30	2.22962e-28
SLC10A1	ENSG00000100652	3.25699	4.11187	2.62659e-30	2.00539e-28
TMEM243	ENSG00000135185	1.85051	5.44676	8.18374e-31	6.29947e-29
DDX39A	ENSG00000123136	2.2597	5.31252	4.40835e-31	3.42139e-29
RP11-455F5.3	ENSG00000250616	3.52827	3.98694	3.07767e-31	2.40853e-29
NEXN	ENSG00000162614	2.9459	4.08891	2.71078e-31	2.13924e-29
EMX1	ENSG00000135638	2.02505	5.28391	2.01964e-31	1.60733e-29
CELF3	ENSG00000159409	3.64046	4.05867	1.87338e-31	1.50367e-29
GNE	ENSG00000159921	2.04023	5.11469	8.36025e-32	6.7682e-30
DENND4C	ENSG00000137145	2.05804	5.72816	8.12013e-32	6.63097e-30
CCDC85B	ENSG00000175602	3.3527	4.25349	6.3637e-32	5.24224e-30
RP11-347C12.12	ENSG00000273724	2.76298	4.83244	5.83649e-32	4.85048e-30
OTUB2	ENSG00000089723	3.31577	4.15481	4.61963e-32	3.87348e-30
TCF7L1	ENSG00000152284	2.25664	5.31001	3.89555e-32	3.29578e-30
GPR160	ENSG00000173890	3.04512	4.49643	3.08889e-32	2.63707e-30
ABI3BP	ENSG00000154175	3.30941	5.07616	2.03629e-32	1.75438e-30
SH3BP5	ENSG00000131370	1.82348	7.22528	1.25578e-32	1.09195e-30
RHOBTB2	ENSG00000008853	1.96861	8.77466	7.74995e-33	6.80184e-31
PEX1	ENSG00000127980	1.97625	6.45289	3.8113e-33	3.37659e-31
SPX	ENSG00000134548	3.09563	4.11572	2.02616e-33	1.81216e-31
POLDIP2	ENSG00000004142	2.88708	4.42515	1.81481e-33	1.63874e-31
FXR2	ENSG00000129245	1.91078	7.23986	1.05172e-33	9.58905e-32
FANCC	ENSG00000158169	2.00776	7.24139	1.0036e-33	9.23998e-32
PAFAH1B3	ENSG00000079462	3.47569	3.76358	7.55821e-34	7.02764e-32
NUP50	ENSG00000093000	2.36385	4.87359	4.72633e-34	4.43849e-32
KDM3A	ENSG00000115548	3.18304	5.1279	2.60642e-34	2.47241e-32
OPA3	ENSG00000125741	1.79284	6.7512	2.08875e-34	2.00158e-32
PSMD6	ENSG00000163636	2.09343	5.24168	1.36738e-34	1.32382e-32
OSBPL2	ENSG00000130703	3.35138	4.30469	1.05979e-34	1.03672e-32
CRHR2	ENSG00000106113	2.45505	5.17132	9.23502e-35	9.12906e-33
RP11-405F3.4	ENSG00000260467	3.24887	4.1707	4.02354e-35	4.01968e-33
CPNE2	ENSG00000140848	2.89502	4.60375	2.94765e-35	2.9765e-33
ZNF335	ENSG00000198026	3.37822	4.07271	2.89731e-35	2.95746e-33
TRAF3	ENSG00000131323	3.93775	5.25022	2.39874e-35	2.47544e-33
FER1L4	ENSG00000088340	3.24272	4.55471	1.77448e-35	1.85157e-33
CA14	ENSG00000118298	3.12848	4.14408	1.44214e-35	1.5217e-33
SLC46A3	ENSG00000139508	3.39771	4.10288	8.70864e-36	9.29351e-34
CEP295	ENSG00000166004	1.98308	6.71919	6.65756e-36	7.18634e-34
LINC01314	ENSG00000259417	2.98903	4.54959	5.92081e-36	6.46538e-34
TUBB1	ENSG00000101162	1.97356	5.80868	5.48038e-36	6.05486e-34
PQBP1	ENSG00000102103	2.97594	4.2703	4.06065e-36	4.53971e-34
CCSAP	ENSG00000154429	2.81298	4.39229	2.74876e-36	3.11007e-34
ACVR2A	ENSG00000121989	2.43781	4.84175	2.64673e-36	3.03115e-34
RP11-1006G14.2	ENSG00000259783	2.29568	5.8227	1.90272e-36	2.20598e-34
IFT172	ENSG00000138002	2.38797	5.10779	8.8562e-37	1.03961e-34
INVS	ENSG00000119509	2.50815	6.01759	8.80793e-38	1.04703e-35
PDZD9	ENSG00000155714	2.80616	4.9701	2.6608e-38	3.20354e-36
ASB8	ENSG00000177981	3.1391	4.70075	2.11002e-38	2.5734e-36
CLOCK	ENSG00000134852	2.1293	5.5308	2.01547e-38	2.49043e-36
RAB26	ENSG00000167964	2.83625	4.96816	1.98693e-38	2.4879e-36
FAM20A	ENSG00000108950	2.4195	6.73843	1.18742e-38	1.5069e-36
UBE2N	ENSG00000177889	3.60084	4.37263	1.02738e-38	1.32167e-36
PAPLN	ENSG00000100767	2.46216	5.20584	3.83663e-39	5.00413e-37
FAAP24	ENSG00000131944	3.30353	4.28299	2.33878e-39	3.09345e-37
AAGAB	ENSG00000103591	3.64401	4.29786	1.54327e-39	2.0704e-37
NID2	ENSG00000087303	2.01166	5.87085	1.48966e-39	2.02745e-37
LEXM	ENSG00000162398	3.07731	4.36001	1.24823e-39	1.72384e-37
MTERF2	ENSG00000120832	2.67091	4.75487	5.0549e-40	7.08516e-38
IRF5	ENSG00000128604	3.81441	4.24034	3.70156e-40	5.26687e-38
FAM169A	ENSG00000198780	2.06711	5.62625	2.3482e-40	3.39261e-38
RP11-255G12.2	ENSG00000258942	3.61227	4.6331	2.60112e-41	3.81673e-39
TSFM	ENSG00000123297	2.38926	5.81126	2.03965e-41	3.04037e-39
RP1-102K2.6	ENSG00000232530	3.48618	4.14103	1.06494e-41	1.61304e-39
SQLE	ENSG00000104549	3.30796	4.64479	9.02162e-42	1.38889e-39
C19orf70	ENSG00000174917	3.87357	4.18797	7.60393e-42	1.19014e-39
RP11-2H8.2	ENSG00000257410	2.53283	5.0987	3.97661e-42	6.32955e-40
AC004448.5	ENSG00000235979	4.40042	5.43706	1.31171e-42	2.12383e-40
NARFL	ENSG00000103245	3.20173	5.7693	4.27355e-43	7.04086e-41
SLC1A7	ENSG00000162383	3.9512	4.39714	1.16605e-43	1.95542e-41
SCG3	ENSG00000104112	3.90535	4.46423	7.33148e-44	1.25182e-41
NAA35	ENSG00000135040	2.57124	5.03799	5.66611e-44	9.85379e-42
ACOT13	ENSG00000112304	2.11773	6.78643	5.30516e-44	9.40015e-42
VSNL1	ENSG00000163032	3.72528	5.50746	4.57651e-44	8.26499e-42
KCTD18	ENSG00000155729	3.35142	4.31895	5.45345e-45	1.00418e-42
MAPT	ENSG00000186868	3.4307	5.20476	2.67379e-45	5.02191e-43
PLPPR3	ENSG00000129951	3.05247	5.78242	1.16995e-45	2.24224e-43
DAGLB	ENSG00000164535	2.73837	5.67716	4.98728e-46	9.7574e-44
MRPS14	ENSG00000120333	2.30267	6.18932	2.19036e-46	4.37652e-44
ZFAND2B	ENSG00000158552	2.08175	7.50297	2.72197e-47	5.55696e-45
DNAJA4	ENSG00000140403	2.76807	5.1292	5.57869e-48	1.16421e-45
MTF1	ENSG00000188786	3.25595	5.64432	3.84595e-48	8.20849e-46
GIGYF1	ENSG00000146830	4.07998	5.32932	1.97522e-48	4.3138e-46
CTD-2587H24.10	ENSG00000267649	3.6719	4.37592	1.27541e-48	2.85177e-46
RAVER2	ENSG00000162437	2.3698	5.81382	4.6053e-49	1.05484e-46
MAP2K1	ENSG00000169032	2.17047	6.35001	2.5905e-49	6.08184e-47
MTMR9LP	ENSG00000220785	3.0075	5.17369	2.38021e-49	5.73144e-47
TMC1	ENSG00000165091	4.96446	6.98972	1.79107e-49	4.42629e-47
ATP4A	ENSG00000105675	3.19138	4.82515	5.62551e-50	1.42781e-47
FGFR1OP2	ENSG00000111790	3.30795	4.92652	1.3141e-52	3.42797e-50
NSUN5P1	ENSG00000223705	2.84432	5.24199	1.17216e-52	3.14506e-50
RP11-137H2.4	ENSG00000226659	3.23155	5.77993	2.45823e-54	6.78977e-52
MAPK15	ENSG00000181085	3.5068	6.05821	2.30535e-55	6.56046e-53
MOV10	ENSG00000155363	4.02237	4.45907	5.76351e-56	1.69141e-53
DARS2	ENSG00000117593	2.71526	6.48417	2.25445e-56	6.82952e-54
FMNL2	ENSG00000157827	3.30055	7.08771	2.52181e-57	7.8941e-55
IDI1	ENSG00000067064	2.69183	5.60447	1.44592e-57	4.6823e-55
ARHGAP31	ENSG00000031081	2.66905	6.07576	1.20756e-57	4.05008e-55
CRNKL1	ENSG00000101343	3.94236	4.57878	1.02233e-57	3.5558e-55
KCNB1	ENSG00000158445	4.09792	6.76951	3.34457e-58	1.20803e-55
USP40	ENSG00000085982	3.10382	5.56347	3.66634e-59	1.37722e-56
MTSS1	ENSG00000170873	2.79464	6.398	2.09363e-59	8.19219e-57
RP11-439H13.2	ENSG00000256199	3.56089	4.81454	1.59268e-60	6.50299e-58
RP11-467K18.2	ENSG00000253973	3.28343	5.20558	2.79597e-61	1.1935e-58
AC005682.6	ENSG00000226329	3.61892	5.0865	2.69603e-62	1.20564e-59
SEMA4D	ENSG00000187764	2.60043	7.07942	1.75513e-62	8.24123e-60
DNAJB13	ENSG00000187726	3.20212	5.51978	3.43135e-63	1.69599e-60
RUFY1	ENSG00000176783	3.47578	5.82031	5.11023e-64	2.66612e-61
TMEM104	ENSG00000109066	5.15708	5.31146	3.28988e-64	1.81737e-61
LINC01270	ENSG00000203999	3.29388	5.20956	1.68266e-64	9.87619e-62
ANKDD1B	ENSG00000189045	3.36135	5.41199	3.32863e-65	2.08395e-62
HIP1R	ENSG00000130787	4.48851	4.72897	1.27281e-65	8.53781e-63
LETM2	ENSG00000165046	2.70504	5.96003	1.71854e-66	1.24145e-63
TMEM63A	ENSG00000196187	3.30192	5.63417	5.08436e-68	3.97894e-65
TXLNG	ENSG00000086712	3.43968	5.93754	2.11336e-70	1.80423e-67
NFE2L3	ENSG00000050344	2.69687	9.39892	2.86896e-77	2.69424e-74
MXI1	ENSG00000119950	4.51476	5.13452	1.3355e-78	1.39352e-75
MTIF2	ENSG00000085760	4.55062	4.86686	4.4814e-83	5.26061e-80
SCN3B	ENSG00000166257	4.67289	5.27171	4.64667e-85	6.23384e-82
PPT1	ENSG00000131238	4.42623	5.06273	1.01823e-91	1.59369e-88
DNMBP	ENSG00000107554	4.8581	5.44784	7.11672e-97	1.33666e-93
TRIM41	ENSG00000146063	4.45891	6.00939	9.73621e-100	2.28582e-96
C12orf73	ENSG00000204954	4.48393	5.75285	5.30842e-116	1.66171e-112
SURF1	ENSG00000148290	5.44755	6.14636	8.13842e-123	3.82139e-119
C6orf25	ENSG00000204420	5.32031	6.79827	4.962e-155	4.65982e-151

## Sheet: common_a549ctrl_and_ddxKOctrl
Genename	Ensembl_ID	KO_logFC1	gene	wt_logFC1
ART3	ENSG00000156219	1.68244	ART3	9.14413
RP11-288L9.4	ENSG00000225886	-1.03876	RP11-288L9.4	7.7153
VPS37B	ENSG00000139722	3.09505	VPS37B	7.66494
IL23A	ENSG00000110944	1.72584	IL23A	5.86616
HDAC1	ENSG00000116478	2.53489	HDAC1	5.67234
ANXA10	ENSG00000109511	1.05988	ANXA10	5.62593
RP1-197B17.3	ENSG00000257433	2.6048	RP1-197B17.3	5.18752
TMC1	ENSG00000165091	4.96446	TMC1	5.00095
SURF1	ENSG00000148290	5.44755	SURF1	4.8277
TBC1D20	ENSG00000125875	2.75493	TBC1D20	4.82622
C6orf25	ENSG00000204420	5.32031	C6orf25	4.81801
KCNB1	ENSG00000158445	4.09792	KCNB1	4.72119
MXI1	ENSG00000119950	4.51476	MXI1	4.70519
PPT1	ENSG00000131238	4.42623	PPT1	4.66917
SORCS2	ENSG00000184985	2.30753	SORCS2	4.52232
RP11-685M7.3	ENSG00000246308	2.61774	RP11-685M7.3	4.34957
ABI3BP	ENSG00000154175	3.30941	ABI3BP	4.34201
TRIM41	ENSG00000146063	4.45891	TRIM41	4.25465
PGAP2	ENSG00000148985	1.86743	PGAP2	4.22391
ADAMTSL4	ENSG00000143382	3.40103	ADAMTSL4	4.19257
KCTD18	ENSG00000155729	3.35142	KCTD18	4.13971
VAT1	ENSG00000108828	1.90705	VAT1	4.12647
C5orf56	ENSG00000197536	2.23243	C5orf56	4.12199
AC005682.6	ENSG00000226329	3.61892	AC005682.6	4.12047
RP11-467K18.2	ENSG00000253973	3.28343	RP11-467K18.2	4.11412
USP30	ENSG00000135093	2.10851	USP30	4.10392
PPP1R9A	ENSG00000158528	2.50927	PPP1R9A	4.09897
AC004448.5	ENSG00000235979	4.40042	AC004448.5	4.08776
IMMP2L	ENSG00000184903	-1.81943	IMMP2L	4.04581
HOMER2	ENSG00000103942	3.11883	HOMER2	4.02409
AAGAB	ENSG00000103591	3.64401	AAGAB	4.01706
TMEM164	ENSG00000157600	3.16835	TMEM164	3.96563
GPATCH11	ENSG00000152133	1.25113	GPATCH11	3.94851
SCG3	ENSG00000104112	3.90535	SCG3	3.94267
POLDIP2	ENSG00000004142	2.88708	POLDIP2	3.92639
RP1-102K2.6	ENSG00000232530	3.48618	RP1-102K2.6	3.89006
NEK6	ENSG00000119408	2.85312	NEK6	3.88654
PRICKLE1	ENSG00000139174	4.25606	PRICKLE1	3.85749
ULK4	ENSG00000168038	1.72187	ULK4	3.81718
RICTOR	ENSG00000164327	2.77709	RICTOR	3.71609
GIGYF1	ENSG00000146830	4.07998	GIGYF1	3.7038
GPX3	ENSG00000211445	1.21395	GPX3	3.66253
SLC46A3	ENSG00000139508	3.39771	SLC46A3	3.66023
INSL6	ENSG00000120210	1.48092	INSL6	3.547
TXLNG	ENSG00000086712	3.43968	TXLNG	3.54221
FAM65C	ENSG00000042062	1.68777	FAM65C	3.50306
C12orf73	ENSG00000204954	4.48393	C12orf73	3.48432
MAPT	ENSG00000186868	3.4307	MAPT	3.47156
RP5-1029K10.2	ENSG00000249906	1.96321	RP5-1029K10.2	3.4713
PEAR1	ENSG00000187800	2.62279	PEAR1	3.43284
MFSD4A	ENSG00000174514	2.03036	MFSD4A	3.43231
COX7A2L	ENSG00000115944	2.78045	COX7A2L	3.39263
RUFY1	ENSG00000176783	3.47578	RUFY1	3.38371
RP11-455F5.3	ENSG00000250616	3.52827	RP11-455F5.3	3.37413
CACFD1	ENSG00000160325	1.79505	CACFD1	3.32059
RP11-439H13.2	ENSG00000256199	3.56089	RP11-439H13.2	3.31717
UNK	ENSG00000132478	3.12129	UNK	3.31701
EHBP1L1	ENSG00000173442	3.45314	EHBP1L1	3.29269
PCSK5	ENSG00000099139	1.45452	PCSK5	3.28216
TSFM	ENSG00000123297	2.38926	TSFM	3.27295
APPL2	ENSG00000136044	1.64797	APPL2	3.26868
C19orf70	ENSG00000174917	3.87357	C19orf70	3.26006
BICDL1	ENSG00000135127	2.96969	BICDL1	3.25843
MAPK15	ENSG00000181085	3.5068	MAPK15	3.25673
TMEM181	ENSG00000146433	2.38024	TMEM181	3.25178
SIGLEC16	ENSG00000161643	2.93748	SIGLEC16	3.1874
VSNL1	ENSG00000163032	3.72528	VSNL1	3.18505
NAB2	ENSG00000166886	1.96169	NAB2	3.17297
RP11-234B24.2	ENSG00000255474	3.23267	RP11-234B24.2	3.16866
NSD1	ENSG00000165671	1.46977	NSD1	3.13724
CCDC167	ENSG00000198937	1.85078	CCDC167	3.12095
CCDC85B	ENSG00000175602	3.3527	CCDC85B	3.07291
USP42	ENSG00000106346	3.71858	USP42	3.03832
DSTN	ENSG00000125868	1.75277	DSTN	3.03419
RP11-255G12.2	ENSG00000258942	3.61227	RP11-255G12.2	3.02963
REC114	ENSG00000183324	2.71168	REC114	3.01718
DAGLB	ENSG00000164535	2.73837	DAGLB	3.00774
RADIL	ENSG00000157927	2.36339	RADIL	2.99143
DOCK5	ENSG00000147459	2.26699	DOCK5	2.98122
CA14	ENSG00000118298	3.12848	CA14	2.96161
SHISA5	ENSG00000164054	1.32412	SHISA5	2.95535
UBAP2	ENSG00000137073	2.79421	UBAP2	2.93602
ADA	ENSG00000196839	2.25005	ADA	2.92881
SYBU	ENSG00000147642	2.35556	SYBU	2.92293
OSBPL2	ENSG00000130703	3.35138	OSBPL2	2.87691
FMNL2	ENSG00000157827	3.30055	FMNL2	2.87586
ACOT13	ENSG00000112304	2.11773	ACOT13	2.87558
TTC23	ENSG00000103852	1.71945	TTC23	2.82474
ANKDD1B	ENSG00000189045	3.36135	ANKDD1B	2.78862
AC074011.2	ENSG00000230730	2.64694	AC074011.2	2.78217
WDR48	ENSG00000114742	2.27773	WDR48	2.7778
FAM63B	ENSG00000128923	2.23247	FAM63B	2.77595
SLC10A1	ENSG00000100652	3.25699	SLC10A1	2.74832
STK32C	ENSG00000165752	1.92688	STK32C	2.74002
DNMBP	ENSG00000107554	4.8581	DNMBP	2.73674
BOLL	ENSG00000152430	1.67938	BOLL	2.71299
LINC01270	ENSG00000203999	3.29388	LINC01270	2.709
RP11-405F3.4	ENSG00000260467	3.24887	RP11-405F3.4	2.6811
ZNF335	ENSG00000198026	3.37822	ZNF335	2.66645
TRAF3	ENSG00000131323	3.93775	TRAF3	2.64592
BID	ENSG00000015475	1.3746	BID	2.6452
CACNB3	ENSG00000167535	2.15312	CACNB3	2.6389
NFE2L2	ENSG00000116044	2.32054	NFE2L2	2.63103
MOCS2	ENSG00000164172	1.64951	MOCS2	2.62678
GPR68	ENSG00000119714	1.12808	GPR68	2.62674
TOR3A	ENSG00000186283	2.10599	TOR3A	2.62136
PGAM5	ENSG00000247077	2.40753	PGAM5	2.61586
MIR4496	ENSG00000257221	3.69746	MIR4496	2.60703
PSKH1	ENSG00000159792	1.3975	PSKH1	2.60045
OTUB2	ENSG00000089723	3.31577	OTUB2	2.59851
CTD-2587H24.10	ENSG00000267649	3.6719	CTD-2587H24.10	2.59789
PPP2R2D	ENSG00000175470	2.78626	PPP2R2D	2.58692
FCGR1A	ENSG00000150337	1.3385	FCGR1A	2.58413
DNAH7	ENSG00000118997	2.38177	DNAH7	2.58131
RP11-347C12.12	ENSG00000273724	2.76298	RP11-347C12.12	2.57443
ADAM22	ENSG00000008277	2.21867	ADAM22	2.57407
FAM150B	ENSG00000189292	3.47232	FAM150B	2.56954
COL17A1	ENSG00000065618	2.86296	COL17A1	2.5663
GPR160	ENSG00000173890	3.04512	GPR160	2.56438
HMBOX1	ENSG00000147421	2.03516	HMBOX1	2.56318
HIF1A	ENSG00000100644	2.67242	HIF1A	2.55691
KIAA0895L	ENSG00000196123	1.27596	KIAA0895L	2.55531
DDX43	ENSG00000080007	1.84745	DDX43	2.55455
TMEM92-AS1	ENSG00000251179	1.04112	TMEM92-AS1	2.53915
FER1L4	ENSG00000088340	3.24272	FER1L4	2.53663
FKBP9	ENSG00000122642	2.09772	FKBP9	2.52671
BICDL2	ENSG00000162069	3.34785	BICDL2	2.52118
PLEKHG2	ENSG00000090924	3.55289	PLEKHG2	2.51812
SQLE	ENSG00000104549	3.30796	SQLE	2.51057
AC005324.6	ENSG00000233002	2.77582	AC005324.6	2.50633
MTMR9LP	ENSG00000220785	3.0075	MTMR9LP	2.50422
SCAP	ENSG00000114650	2.53782	SCAP	2.49869
SGCG	ENSG00000102683	2.39723	SGCG	2.49324
PDSS1	ENSG00000148459	2.4484	PDSS1	2.49187
AP001189.4	ENSG00000236304	1.65598	AP001189.4	2.48937
RAD52	ENSG00000002016	2.23865	RAD52	2.48446
KLB	ENSG00000134962	2.6056	KLB	2.47868
RP11-386G11.3	ENSG00000258283	3.30861	RP11-386G11.3	2.47735
COQ8A	ENSG00000163050	2.53334	COQ8A	2.44909
SSBP3	ENSG00000157216	2.92179	SSBP3	2.4483
NFE2L3	ENSG00000050344	2.69687	NFE2L3	2.44431
RP11-599J14.2	ENSG00000256673	2.91386	RP11-599J14.2	2.43281
NEXN	ENSG00000162614	2.9459	NEXN	2.42359
VPS13B	ENSG00000132549	1.95363	VPS13B	2.41432
ADCY10	ENSG00000143199	1.15553	ADCY10	2.41368
ANKZF1	ENSG00000163516	2.69652	ANKZF1	2.41177
PAPSS2	ENSG00000198682	2.25749	PAPSS2	2.41033
SGCE	ENSG00000127990	2.34537	SGCE	2.39508
SHMT1	ENSG00000176974	1.77886	SHMT1	2.39508
IFT172	ENSG00000138002	2.38797	IFT172	2.39337
PLAC9	ENSG00000189129	3.13175	PLAC9	2.39145
TCF7L1	ENSG00000152284	2.25664	TCF7L1	2.38851
DNAH12	ENSG00000174844	1.66867	DNAH12	2.36977
PPM1H	ENSG00000111110	1.27696	PPM1H	2.36148
KDELR3	ENSG00000100196	2.49211	KDELR3	2.3496
ITSN1	ENSG00000205726	2.0011	ITSN1	2.34766
ZNF692	ENSG00000171163	2.63035	ZNF692	2.3434
KCNT1	ENSG00000107147	3.27595	KCNT1	2.34129
GPR161	ENSG00000143147	2.88891	GPR161	2.33994
ZNF219	ENSG00000165804	1.2148	ZNF219	2.33947
CLOCK	ENSG00000134852	2.1293	CLOCK	2.33497
KLF9	ENSG00000119138	2.41194	KLF9	2.33376
KANTR	ENSG00000232593	2.05794	KANTR	2.33008
UBE2N	ENSG00000177889	3.60084	UBE2N	2.32688
TAF11	ENSG00000064995	1.29937	TAF11	2.32396
KIAA1549L	ENSG00000110427	1.40552	KIAA1549L	2.32068
MAPK8IP3	ENSG00000138834	2.58283	MAPK8IP3	2.31458
FHL2	ENSG00000115641	2.36761	FHL2	2.31394
DACT3-AS1	ENSG00000245598	1.0776	DACT3-AS1	2.31004
INVS	ENSG00000119509	2.50815	INVS	2.3083
ZNF711	ENSG00000147180	1.45775	ZNF711	2.30006
CASQ1	ENSG00000143318	1.97165	CASQ1	2.29891
FAM111B	ENSG00000189057	1.0316	FAM111B	2.28635
TMEM198	ENSG00000188760	3.66473	TMEM198	2.28523
MSTO1	ENSG00000125459	1.57413	MSTO1	2.28424
TRAPPC2	ENSG00000196459	1.53393	TRAPPC2	2.28412
RP11-137H2.4	ENSG00000226659	3.23155	RP11-137H2.4	2.28375
SLC23A1	ENSG00000170482	2.63079	SLC23A1	2.27521
SNTB1	ENSG00000172164	1.56228	SNTB1	2.27393
RNFT1	ENSG00000189050	1.65972	RNFT1	2.248
ATP4A	ENSG00000105675	3.19138	ATP4A	2.23898
CRNKL1	ENSG00000101343	3.94236	CRNKL1	2.23893
R3HCC1	ENSG00000104679	1.40285	R3HCC1	2.2355
SPINK4	ENSG00000122711	2.90757	SPINK4	2.23217
CNOT11	ENSG00000158435	1.50077	CNOT11	2.22421
ZCCHC14	ENSG00000140948	2.92265	ZCCHC14	2.22314
PAPLN	ENSG00000100767	2.46216	PAPLN	2.22168
FAAP24	ENSG00000131944	3.30353	FAAP24	2.19166
MTF1	ENSG00000188786	3.25595	MTF1	2.18371
RHOBTB2	ENSG00000008853	1.96861	RHOBTB2	2.1807
ACVR2A	ENSG00000121989	2.43781	ACVR2A	2.17649
TMEM243	ENSG00000135185	1.85051	TMEM243	2.15617
CEP95	ENSG00000258890	2.4719	CEP95	2.14576
RP11-446H18.5	ENSG00000239828	1.17128	RP11-446H18.5	2.13639
LEO1	ENSG00000166477	1.97443	LEO1	2.13439
LRSAM1	ENSG00000148356	1.9503	LRSAM1	2.1292
FGFR1OP2	ENSG00000111790	3.30795	FGFR1OP2	2.10905
LINC01314	ENSG00000259417	2.98903	LINC01314	2.10594
HMGCR	ENSG00000113161	2.25111	HMGCR	2.10586
TCF19	ENSG00000137310	1.32269	TCF19	2.10483
PHF1	ENSG00000112511	3.01665	PHF1	2.10476
KDM3A	ENSG00000115548	3.18304	KDM3A	2.10421
CCSAP	ENSG00000154429	2.81298	CCSAP	2.10154
DARS2	ENSG00000117593	2.71526	DARS2	2.09587
PLD5	ENSG00000180287	-1.40542	PLD5	2.09547
TBC1D3P1-DHX40P1	ENSG00000267104	1.80053	TBC1D3P1-DHX40P1	2.09396
TK1	ENSG00000167900	2.06597	TK1	2.0933
CLCN3	ENSG00000109572	2.09126	CLCN3	2.08987
PSMD6	ENSG00000163636	2.09343	PSMD6	2.07897
CTU2	ENSG00000174177	1.88523	CTU2	2.07065
CAPN2	ENSG00000162909	1.01823	CAPN2	2.06443
MMP25-AS1	ENSG00000261971	2.0458	MMP25-AS1	2.04936
JAZF1	ENSG00000153814	1.81122	JAZF1	2.04787
PROCA1	ENSG00000167525	2.81979	PROCA1	2.04422
FZR1	ENSG00000105325	1.03329	FZR1	2.04187
NUTM1	ENSG00000184507	2.00617	NUTM1	2.02929
RP11-352D13.6	ENSG00000261634	1.75216	RP11-352D13.6	2.02632
APTR	ENSG00000214293	1.77523	APTR	2.02512
IDI1	ENSG00000067064	2.69183	IDI1	2.02139
NAA35	ENSG00000135040	2.57124	NAA35	2.02093
SLC15A3	ENSG00000110446	1.31516	SLC15A3	2.01823
SLC7A7	ENSG00000155465	2.34128	SLC7A7	2.01664
ARHGAP31	ENSG00000031081	2.66905	ARHGAP31	2.01273
RP11-973N13.3	ENSG00000259076	1.75074	RP11-973N13.3	2.01218
GNA14	ENSG00000156049	1.50224	GNA14	2.01206
RP11-516J2.1	ENSG00000258402	1.21169	RP11-516J2.1	2.01173
USP47	ENSG00000170242	1.03006	USP47	2.00825
MTSS1	ENSG00000170873	2.79464	MTSS1	1.99901
ZNF385C	ENSG00000187595	2.05303	ZNF385C	1.99857
ZHX3	ENSG00000174306	2.38651	ZHX3	1.99394
BRAT1	ENSG00000106009	2.27893	BRAT1	1.98379
HSD3B7	ENSG00000099377	1.22748	HSD3B7	1.98269
SEC24C	ENSG00000176986	1.06316	SEC24C	1.98079
ASB8	ENSG00000177981	3.1391	ASB8	1.97916
SPX	ENSG00000134548	3.09563	SPX	1.97734
ALAS2	ENSG00000158578	1.90591	ALAS2	1.97577
IGF2BP3	ENSG00000136231	1.44562	IGF2BP3	1.96037
RTN3	ENSG00000133318	1.54465	RTN3	1.95377
CCDC38	ENSG00000165972	1.62489	CCDC38	1.93843
CLCN2	ENSG00000114859	2.74776	CLCN2	1.93757
MTERF2	ENSG00000120832	2.67091	MTERF2	1.93575
EDC3	ENSG00000179151	1.83173	EDC3	1.93455
ZFP28	ENSG00000196867	1.22917	ZFP28	1.93098
MBTD1	ENSG00000011258	2.24756	MBTD1	1.93057
CROCCP3	ENSG00000080947	1.09245	CROCCP3	1.92596
CARS2	ENSG00000134905	1.86166	CARS2	1.92197
PAFAH1B3	ENSG00000079462	3.47569	PAFAH1B3	1.91867
TMEM238	ENSG00000233493	2.43743	TMEM238	1.91092
GPRIN2	ENSG00000204175	1.60648	GPRIN2	1.90599
RP11-290L1.2	ENSG00000257839	2.84949	RP11-290L1.2	1.90575
PQLC3	ENSG00000162976	1.91651	PQLC3	1.90175
RFPL3	ENSG00000128276	1.62018	RFPL3	1.89561
LETM2	ENSG00000165046	2.70504	LETM2	1.87714
CDC37L1	ENSG00000106993	1.36362	CDC37L1	1.87624
GALNT11	ENSG00000178234	1.37767	GALNT11	1.87176
ADCY5	ENSG00000173175	2.35661	ADCY5	1.87073
RP11-108P20.2	ENSG00000267501	2.5834	RP11-108P20.2	1.86225
TIMM8B	ENSG00000150779	2.37566	TIMM8B	1.85764
RP11-176D17.3	ENSG00000228470	2.0104	RP11-176D17.3	1.85447
RP11-1006G14.2	ENSG00000259783	2.29568	RP11-1006G14.2	1.85371
ITGA2	ENSG00000164171	2.00252	ITGA2	1.85234
CPSF3	ENSG00000119203	1.89046	CPSF3	1.84924
LOXL4	ENSG00000138131	1.95334	LOXL4	1.84835
GNS	ENSG00000135677	1.65213	GNS	1.84799
FAM134B	ENSG00000154153	1.68261	FAM134B	1.84786
CRHR2	ENSG00000106113	2.45505	CRHR2	1.84141
CMTM4	ENSG00000183723	2.07968	CMTM4	1.84096
BTBD9	ENSG00000183826	1.08398	BTBD9	1.83238
RARB	ENSG00000077092	1.46776	RARB	1.82999
ITIH2	ENSG00000151655	2.29905	ITIH2	1.8287
RBPMS	ENSG00000157110	1.14189	RBPMS	1.8184
RP11-1060J15.4	ENSG00000256377	1.99986	RP11-1060J15.4	1.81378
PKD1L3	ENSG00000277481	1.62002	PKD1L3	1.81273
RNF167	ENSG00000108523	2.10584	RNF167	1.80546
NCBP2	ENSG00000114503	2.19112	NCBP2	1.80472
NSUN5P1	ENSG00000223705	2.84432	NSUN5P1	1.80441
LRRN2	ENSG00000170382	1.26785	LRRN2	1.8
RWDD1	ENSG00000111832	1.53326	RWDD1	1.79444
RP5-1029F21.3	ENSG00000263015	2.53956	RP5-1029F21.3	1.79419
RAVER2	ENSG00000162437	2.3698	RAVER2	1.79196
RP11-169K16.4	ENSG00000224459	2.65562	RP11-169K16.4	1.79183
PDZD9	ENSG00000155714	2.80616	PDZD9	1.7915
RAB26	ENSG00000167964	2.83625	RAB26	1.78575
EML6	ENSG00000214595	1.44547	EML6	1.78165
MCC	ENSG00000171444	1.15114	MCC	1.77985
AP1S2	ENSG00000182287	1.91999	AP1S2	1.77977
RPRD1A	ENSG00000141425	2.23772	RPRD1A	1.77882
ALS2CR12	ENSG00000155749	1.3386	ALS2CR12	1.77522
LEXM	ENSG00000162398	3.07731	LEXM	1.77471
PLCD3	ENSG00000161714	2.82287	PLCD3	1.77406
SMC1B	ENSG00000077935	1.86704	SMC1B	1.76962
UBE2R2	ENSG00000107341	1.50585	UBE2R2	1.76912
PNO1	ENSG00000115946	2.1978	PNO1	1.76872
USP49	ENSG00000164663	2.24634	USP49	1.76833
NIF3L1	ENSG00000196290	2.37502	NIF3L1	1.7614
DNAJB13	ENSG00000187726	3.20212	DNAJB13	1.76012
MEGF11	ENSG00000157890	1.5936	MEGF11	1.75266
PODXL	ENSG00000128567	2.07977	PODXL	1.75024
RFTN2	ENSG00000162944	2.16314	RFTN2	1.74874
RHOBTB1	ENSG00000072422	1.83051	RHOBTB1	1.74408
TADA2B	ENSG00000173011	2.11663	TADA2B	1.73691
FAM20A	ENSG00000108950	2.4195	FAM20A	1.73519
BAIAP2L1	ENSG00000006453	2.14254	BAIAP2L1	1.73502
LACTB	ENSG00000103642	2.05383	LACTB	1.73442
LRRN4	ENSG00000125872	2.6073	LRRN4	1.73264
STX17	ENSG00000136874	1.87335	STX17	1.73028
POLR3C	ENSG00000186141	1.78771	POLR3C	1.72352
KIF22	ENSG00000079616	1.2614	KIF22	1.72211
UCKL1	ENSG00000198276	2.90886	UCKL1	1.71808
BOC	ENSG00000144857	2.56891	BOC	1.71771
VPS54	ENSG00000143952	1.61748	VPS54	1.71583
RP11-315I20.3	ENSG00000244619	1.9716	RP11-315I20.3	1.71451
HFE	ENSG00000010704	1.40074	HFE	1.71339
USP40	ENSG00000085982	3.10382	USP40	1.7111
MAP2K1	ENSG00000169032	2.17047	MAP2K1	1.71031
TACR2	ENSG00000075073	2.42304	TACR2	1.70815
FKBP3	ENSG00000100442	2.66329	FKBP3	1.70648
FXR2	ENSG00000129245	1.91078	FXR2	1.70327
NID2	ENSG00000087303	2.01166	NID2	1.70169
KAT2B	ENSG00000114166	1.85965	KAT2B	1.69952
TTLL9	ENSG00000131044	1.71124	TTLL9	1.69938
PNRC2	ENSG00000189266	2.8751	PNRC2	1.69763
LMOD1	ENSG00000163431	2.0998	LMOD1	1.69193
LINC00534	ENSG00000253394	1.26626	LINC00534	1.69106
TTPAL	ENSG00000124120	1.82256	TTPAL	1.68936
RUNDC3A	ENSG00000108309	2.62399	RUNDC3A	1.68672
THEM6	ENSG00000130193	1.17026	THEM6	1.68318
AANAT	ENSG00000129673	1.13265	AANAT	1.6811
SLC2A12	ENSG00000146411	2.65608	SLC2A12	1.6808
SGPL1	ENSG00000166224	1.88655	SGPL1	1.67703
CPNE2	ENSG00000140848	2.89502	CPNE2	1.67596
ZFHX2	ENSG00000136367	2.59773	ZFHX2	1.67262
CHPT1	ENSG00000111666	1.80457	CHPT1	1.67117
SUSD5	ENSG00000173705	2.08678	SUSD5	1.66827
SLC48A1	ENSG00000211584	2.07517	SLC48A1	1.66357
JAM2	ENSG00000154721	2.39805	JAM2	1.6613
WNT8B	ENSG00000075290	1.76985	WNT8B	1.65812
NUP210L	ENSG00000143552	1.72851	NUP210L	1.65184
C1QBP	ENSG00000108561	1.85059	C1QBP	1.65064
ZRSR2	ENSG00000169249	1.3296	ZRSR2	1.64986
DNAJC5	ENSG00000101152	1.69972	DNAJC5	1.64849
FAM83H-AS1	ENSG00000203499	2.45355	FAM83H-AS1	1.64758
RUFY3	ENSG00000018189	2.21893	RUFY3	1.64056
APOBEC2	ENSG00000124701	1.65504	APOBEC2	1.63785
PDE3B	ENSG00000152270	1.43592	PDE3B	1.63697
CCDC84	ENSG00000186166	1.87712	CCDC84	1.63143
SRPX2	ENSG00000102359	1.29602	SRPX2	1.62876
ZNF561-AS1	ENSG00000267106	2.19409	ZNF561-AS1	1.62833
GSDMD	ENSG00000104518	1.93774	GSDMD	1.62709
PQBP1	ENSG00000102103	2.97594	PQBP1	1.62249
RP11-589M4.3	ENSG00000258698	2.02307	RP11-589M4.3	1.61635
RP11-428P16.2	ENSG00000213514	1.3769	RP11-428P16.2	1.61073
SEMA4D	ENSG00000187764	2.60043	SEMA4D	1.60879
RP11-456N14.4	ENSG00000283148	2.09494	RP11-456N14.4	1.60865
HEATR9	ENSG00000270379	2.22843	HEATR9	1.60602
CRIM1	ENSG00000150938	1.14498	CRIM1	1.60099
CEP295	ENSG00000166004	1.98308	CEP295	1.59955
SECTM1	ENSG00000141574	1.53587	SECTM1	1.599
CTB-33O18.3	ENSG00000253955	2.75925	CTB-33O18.3	1.5926
MGC16275	ENSG00000246731	2.1553	MGC16275	1.59198
DNAJA4	ENSG00000140403	2.76807	DNAJA4	1.59176
TRPC7	ENSG00000069018	2.19772	TRPC7	1.58828
RP11-513G11.2	ENSG00000228271	1.69745	RP11-513G11.2	1.57932
SOX15	ENSG00000129194	2.08465	SOX15	1.57792
AMBP	ENSG00000106927	1.69887	AMBP	1.57611
TTC31	ENSG00000115282	1.44358	TTC31	1.57292
CSPP1	ENSG00000104218	1.2543	CSPP1	1.5712
RNPEPL1	ENSG00000142327	2.40144	RNPEPL1	1.57065
THOC1	ENSG00000079134	2.26596	THOC1	1.56647
SETD1A	ENSG00000099381	1.18825	SETD1A	1.56428
UGP2	ENSG00000169764	1.87342	UGP2	1.55896
PFDN1	ENSG00000113068	2.35216	PFDN1	1.55762
GINS1	ENSG00000101003	1.53923	GINS1	1.55615
STEAP3	ENSG00000115107	1.5716	STEAP3	1.55594
FSTL4	ENSG00000053108	1.70756	FSTL4	1.5528
KCNH3	ENSG00000135519	1.79601	KCNH3	1.55231
NUDCD2	ENSG00000170584	1.88186	NUDCD2	1.5503
GZF1	ENSG00000125812	1.52986	GZF1	1.5502
EXOC6B	ENSG00000144036	-1.85174	EXOC6B	1.54825
TMEM9B-AS1	ENSG00000254860	1.16533	TMEM9B-AS1	1.54542
DIO1	ENSG00000211452	1.03876	DIO1	1.53771
NUTM2G	ENSG00000188152	1.71213	NUTM2G	1.53397
PCNX2	ENSG00000135749	1.46738	PCNX2	1.5278
HOXB-AS1	ENSG00000230148	1.51126	HOXB-AS1	1.52491
RP11-862L9.3	ENSG00000266844	2.17704	RP11-862L9.3	1.52269
ST6GALNAC2	ENSG00000070731	2.42078	ST6GALNAC2	1.52029
RGMA	ENSG00000182175	2.04106	RGMA	1.51666
DNAH1	ENSG00000114841	1.91845	DNAH1	1.51604
IGLON5	ENSG00000142549	1.49704	IGLON5	1.51191
IL21R	ENSG00000103522	2.54068	IL21R	1.51084
OVOS2	ENSG00000177359	1.63387	OVOS2	1.50828
RP3-453C12.15	ENSG00000277022	1.21423	RP3-453C12.15	1.50795
RP11-672A2.3	ENSG00000254975	1.2722	RP11-672A2.3	1.50519
C1orf168	ENSG00000187889	1.17537	C1orf168	1.49988
PLPPR3	ENSG00000129951	3.05247	PLPPR3	1.49968
NECAB1	ENSG00000123119	1.69938	NECAB1	1.49534
NAXD	ENSG00000213995	2.56543	NAXD	1.49489
RP11-296E7.1	ENSG00000218418	2.34708	RP11-296E7.1	1.49165
ARNTL	ENSG00000133794	1.60173	ARNTL	1.49014
TAF9B	ENSG00000187325	1.23323	TAF9B	1.48777
GNE	ENSG00000159921	2.04023	GNE	1.4838
EIF5A	ENSG00000132507	1.80552	EIF5A	1.48259
TMC5	ENSG00000103534	1.50937	TMC5	1.48251
TRMT13	ENSG00000122435	1.20574	TRMT13	1.4779
TMEM129	ENSG00000168936	1.14052	TMEM129	1.47638
KLHL29	ENSG00000119771	1.32518	KLHL29	1.474
FBXO41	ENSG00000163013	2.38754	FBXO41	1.47263
PIAS4	ENSG00000105229	1.63211	PIAS4	1.46867
ISM1	ENSG00000101230	2.14685	ISM1	1.46844
ZFAND2B	ENSG00000158552	2.08175	ZFAND2B	1.46843
SWT1	ENSG00000116668	1.78185	SWT1	1.46355
OGFR-AS1	ENSG00000229873	1.12361	OGFR-AS1	1.46135
PSMD3	ENSG00000108344	1.39691	PSMD3	1.44735
RP5-1024N4.2	ENSG00000223720	1.54173	RP5-1024N4.2	1.44166
CHTF8	ENSG00000168802	1.65557	CHTF8	1.43181
EIF2S1	ENSG00000134001	1.2913	EIF2S1	1.42815
THUMPD3	ENSG00000134077	1.28924	THUMPD3	1.42606
ADRA1D	ENSG00000171873	2.05376	ADRA1D	1.4183
ZNF285B	ENSG00000176761	1.94736	ZNF285B	1.41626
SAMD4B	ENSG00000179134	1.11156	SAMD4B	1.41502
E4F1	ENSG00000167967	2.2078	E4F1	1.41479
RP11-770G2.2	ENSG00000255557	1.05029	RP11-770G2.2	1.41317
PDE8B	ENSG00000113231	1.22756	PDE8B	1.41311
MAST2	ENSG00000086015	1.74417	MAST2	1.40848
AC093162.5	ENSG00000246575	2.07752	AC093162.5	1.40747
DENND4C	ENSG00000137145	2.05804	DENND4C	1.40525
CD160	ENSG00000117281	1.65226	CD160	1.40026
MAMDC4	ENSG00000177943	2.04871	MAMDC4	1.39899
RP11-667K14.5	ENSG00000262810	1.61831	RP11-667K14.5	1.39864
GALM	ENSG00000143891	1.65595	GALM	1.39012
RNF144A	ENSG00000151692	-1.42597	RNF144A	1.37922
MCMBP	ENSG00000197771	1.70297	MCMBP	1.37812
RMND1	ENSG00000155906	1.56371	RMND1	1.37753
RP11-104H15.8	ENSG00000263301	1.01967	RP11-104H15.8	1.37608
CUL1	ENSG00000055130	1.25757	CUL1	1.37547
TBP	ENSG00000112592	2.85942	TBP	1.37156
TRIB3	ENSG00000101255	1.04191	TRIB3	1.3677
C7orf71	ENSG00000222004	1.54314	C7orf71	1.36733
ACTL6A	ENSG00000136518	1.85792	ACTL6A	1.36697
INPP5E	ENSG00000148384	1.96866	INPP5E	1.36448
DRAM1	ENSG00000136048	1.31732	DRAM1	1.36424
NTAN1	ENSG00000157045	2.38813	NTAN1	1.3631
CTD-2538C1.3	ENSG00000267567	1.79444	CTD-2538C1.3	1.35923
ZBTB17	ENSG00000116809	1.51932	ZBTB17	1.35439
IARS2	ENSG00000067704	1.37261	IARS2	1.35342
ARHGEF16	ENSG00000130762	1.3256	ARHGEF16	1.35217
WNT4	ENSG00000162552	1.99981	WNT4	1.35179
PRMT9	ENSG00000164169	1.09567	PRMT9	1.35115
ATL1	ENSG00000198513	1.6691	ATL1	1.35098
SGSM2	ENSG00000141258	1.89273	SGSM2	1.34817
RP11-2H8.2	ENSG00000257410	2.53283	RP11-2H8.2	1.34697
NAALADL1	ENSG00000168060	2.51313	NAALADL1	1.34325
LIPC	ENSG00000166035	1.36263	LIPC	1.338
MRPS14	ENSG00000120333	2.30267	MRPS14	1.33764
SEC24D	ENSG00000150961	1.4142	SEC24D	1.33637
ZNF420	ENSG00000197050	1.23584	ZNF420	1.33501
TMEM150C	ENSG00000249242	1.5977	TMEM150C	1.33331
OSGEPL1-AS1	ENSG00000253559	1.61512	OSGEPL1-AS1	1.32675
PRDM4	ENSG00000110851	1.09653	PRDM4	1.32487
GLRA1	ENSG00000145888	1.77446	GLRA1	1.32106
PEX1	ENSG00000127980	1.97625	PEX1	1.31869
CCDC90B	ENSG00000137500	1.75699	CCDC90B	1.31673
TEX2	ENSG00000136478	1.56656	TEX2	1.31436
CCDC150	ENSG00000144395	1.74353	CCDC150	1.31114
IMMT	ENSG00000132305	1.65711	IMMT	1.31049
RP11-135A24.2	ENSG00000229327	1.19533	RP11-135A24.2	1.30886
PCYOX1	ENSG00000116005	1.34359	PCYOX1	1.30223
ZDHHC16	ENSG00000171307	2.28634	ZDHHC16	1.29934
TUBB1	ENSG00000101162	1.97356	TUBB1	1.29931
RP11-677M14.3	ENSG00000250073	2.27339	RP11-677M14.3	1.29866
KIF24	ENSG00000186638	2.05564	KIF24	1.29603
ZNF513	ENSG00000163795	1.66683	ZNF513	1.29441
BBS4	ENSG00000140463	1.34544	BBS4	1.29433
GREB1L	ENSG00000141449	1.22591	GREB1L	1.29321
CD302	ENSG00000241399	1.53774	CD302	1.29205
ZBTB48	ENSG00000204859	2.20166	ZBTB48	1.28971
NLRP9	ENSG00000185792	1.90278	NLRP9	1.28615
ISLR	ENSG00000129009	1.3685	ISLR	1.28569
PROZ	ENSG00000126231	1.5527	PROZ	1.2848
JARID2	ENSG00000008083	1.4	JARID2	1.28451
LRRC71	ENSG00000160838	1.94765	LRRC71	1.28376
HIST1H3E	ENSG00000274750	1.21479	HIST1H3E	1.28227
EMX1	ENSG00000135638	2.02505	EMX1	1.28205
MPHOSPH8	ENSG00000196199	1.42352	MPHOSPH8	1.27884
MROH2A	ENSG00000185038	1.93003	MROH2A	1.27681
RABEP2	ENSG00000177548	1.74301	RABEP2	1.27429
RANBP9	ENSG00000010017	1.56271	RANBP9	1.27329
CCDC121	ENSG00000176714	1.54345	CCDC121	1.27308
PDZK1	ENSG00000174827	1.57435	PDZK1	1.26945
XPC	ENSG00000154767	1.05306	XPC	1.26932
BIRC6-AS2	ENSG00000279897	1.46025	BIRC6-AS2	1.26695
NGEF	ENSG00000066248	2.09496	NGEF	1.26507
FAM169A	ENSG00000198780	2.06711	FAM169A	1.26248
GABARAPL2	ENSG00000034713	1.67475	GABARAPL2	1.25984
GBAP1	ENSG00000160766	1.58841	GBAP1	1.25269
RP11-481K16.2	ENSG00000248924	1.02723	RP11-481K16.2	1.25201
USP24	ENSG00000162402	2.48778	USP24	1.24552
AKAP9	ENSG00000127914	1.98248	AKAP9	1.24514
YIF1A	ENSG00000174851	2.19682	YIF1A	1.24456
SHC3	ENSG00000148082	1.1905	SHC3	1.24393
ZNF740	ENSG00000139651	1.55421	ZNF740	1.24287
ATP2A1-AS1	ENSG00000260442	1.63792	ATP2A1-AS1	1.24232
ALDH1L2	ENSG00000136010	1.27305	ALDH1L2	1.2422
SMYD3	ENSG00000185420	-2.20147	SMYD3	1.24194
RPGRIP1	ENSG00000092200	1.53129	RPGRIP1	1.23915
NEMP2	ENSG00000189362	1.56899	NEMP2	1.23201
RP1-149A16.3	ENSG00000230736	1.39957	RP1-149A16.3	1.22953
PCGF1	ENSG00000115289	2.16542	PCGF1	1.22952
SYNM	ENSG00000182253	1.54129	SYNM	1.22948
RGMB	ENSG00000174136	1.51827	RGMB	1.22876
NUDT4	ENSG00000173598	2.01259	NUDT4	1.22753
IFT46	ENSG00000118096	1.12272	IFT46	1.22182
RBCK1	ENSG00000125826	2.5286	RBCK1	1.2195
NEK4	ENSG00000114904	1.6598	NEK4	1.21841
NAA20	ENSG00000173418	1.04337	NAA20	1.21747
ANKH	ENSG00000154122	1.33144	ANKH	1.21713
RP11-277A4.4	ENSG00000203325	1.23604	RP11-277A4.4	1.21305
CYP3A4	ENSG00000160868	1.80762	CYP3A4	1.21174
AL356053.1	ENSG00000150076	1.55481	AL356053.1	1.21053
IL20RB-AS1	ENSG00000249407	1.61878	IL20RB-AS1	1.20899
CELSR3-AS1	ENSG00000228350	1.00681	CELSR3-AS1	1.20861
DGKD	ENSG00000077044	1.22186	DGKD	1.20818
PI4K2A	ENSG00000155252	1.45883	PI4K2A	1.20752
RP11-343K8.3	ENSG00000264914	1.14661	RP11-343K8.3	1.20604
SNW1	ENSG00000100603	1.73222	SNW1	1.2039
FBXO33	ENSG00000165355	2.26489	FBXO33	1.20206
HAS1	ENSG00000105509	1.95474	HAS1	1.19816
RP11-174G6.1	ENSG00000214772	1.42074	RP11-174G6.1	1.19674
IL12RB2	ENSG00000081985	1.56958	IL12RB2	1.19558
XPO5	ENSG00000124571	2.05504	XPO5	1.19284
PITRM1	ENSG00000107959	1.22428	PITRM1	1.19123
ANTXR1	ENSG00000169604	1.03742	ANTXR1	1.1892
TMEM126A	ENSG00000171202	1.20299	TMEM126A	1.18528
CTC-459F4.5	ENSG00000266977	1.91417	CTC-459F4.5	1.18092
SERINC4	ENSG00000184716	1.6944	SERINC4	1.18067
GRIN3A	ENSG00000198785	1.48167	GRIN3A	1.17867
RAD21	ENSG00000164754	2.36262	RAD21	1.17676
NUDT5	ENSG00000165609	1.44559	NUDT5	1.17647
IL17B	ENSG00000127743	2.15446	IL17B	1.17588
SMLR1	ENSG00000256162	1.14885	SMLR1	1.16885
COL6A6	ENSG00000206384	1.5308	COL6A6	1.16866
CCDC106	ENSG00000173581	2.1164	CCDC106	1.16742
SH3BP5	ENSG00000131370	1.82348	SH3BP5	1.16663
OPA3	ENSG00000125741	1.79284	OPA3	1.1659
CTB-60B18.10	ENSG00000268655	2.28039	CTB-60B18.10	1.1633
TLCD1	ENSG00000160606	1.89048	TLCD1	1.16298
RP11-863P13.4	ENSG00000205037	1.1971	RP11-863P13.4	1.16297
ORMDL1	ENSG00000128699	2.11344	ORMDL1	1.16099
CCNB2	ENSG00000157456	1.10014	CCNB2	1.15885
CTC-308K20.1	ENSG00000204758	2.05229	CTC-308K20.1	1.15838
LTBP2	ENSG00000119681	1.32248	LTBP2	1.15832
CFAP36	ENSG00000163001	1.53208	CFAP36	1.15801
PPME1	ENSG00000214517	1.04462	PPME1	1.15334
GALNT7	ENSG00000109586	1.2117	GALNT7	1.15233
CDKN3	ENSG00000100526	2.1978	CDKN3	1.15167
TNN	ENSG00000120332	1.46122	TNN	1.14725
RP11-504P24.5	ENSG00000229930	2.36666	RP11-504P24.5	1.14706
HIRIP3	ENSG00000149929	1.72922	HIRIP3	1.14623
TMCO6	ENSG00000113119	2.26949	TMCO6	1.14544
PARP16	ENSG00000138617	1.28529	PARP16	1.14406
RNF146	ENSG00000118518	1.45888	RNF146	1.14404
BORA	ENSG00000136122	1.49877	BORA	1.14397
LONP1	ENSG00000196365	2.25932	LONP1	1.14288
SLC31A2	ENSG00000136867	1.25292	SLC31A2	1.12608
RGS20	ENSG00000147509	2.01823	RGS20	1.12511
RP11-304M2.3	ENSG00000255229	1.51892	RP11-304M2.3	1.12185
CPM	ENSG00000135678	1.23787	CPM	1.12033
ARV1	ENSG00000173409	1.03515	ARV1	1.1174
PSTPIP1	ENSG00000140368	2.33958	PSTPIP1	1.11657
ITGA11	ENSG00000137809	1.31117	ITGA11	1.11613
CACNA2D2	ENSG00000007402	1.07731	CACNA2D2	1.11535
CCDC13-AS1	ENSG00000173811	1.49533	CCDC13-AS1	1.11264
PLXNB3	ENSG00000198753	1.38231	PLXNB3	1.11096
RP11-1099M24.6	ENSG00000280046	1.13349	RP11-1099M24.6	1.11018
ECT2L	ENSG00000203734	1.48984	ECT2L	1.10747
SMTN	ENSG00000183963	1.09234	SMTN	1.10652
GIT1	ENSG00000108262	1.77241	GIT1	1.10087
SMAD3	ENSG00000166949	1.13611	SMAD3	1.0995
CTSH	ENSG00000103811	1.91442	CTSH	1.09922
UNC5C	ENSG00000182168	1.08142	UNC5C	1.09778
PRELID1	ENSG00000169230	2.24279	PRELID1	1.09541
NEURL1	ENSG00000107954	1.54109	NEURL1	1.09503
EDRF1	ENSG00000107938	1.16469	EDRF1	1.09009
FAM208B	ENSG00000108021	1.4396	FAM208B	1.08785
SLC39A5	ENSG00000139540	1.71271	SLC39A5	1.08746
MTMR7	ENSG00000003987	1.2881	MTMR7	1.08511
ARID5A	ENSG00000196843	1.43994	ARID5A	1.08445
RP11-252A24.5	ENSG00000261170	1.62403	RP11-252A24.5	1.0842
RP11-95P13.1	ENSG00000230024	1.04805	RP11-95P13.1	1.08207
SCYL1	ENSG00000142186	1.71814	SCYL1	1.08169
SETDB1	ENSG00000143379	1.60676	SETDB1	1.08092
NDRG4	ENSG00000103034	1.70952	NDRG4	1.07904
RP11-274B21.12	ENSG00000229413	1.03502	RP11-274B21.12	1.07869
GPM6B	ENSG00000046653	1.12224	GPM6B	1.07857
CTC-359M8.1	ENSG00000250025	1.24327	CTC-359M8.1	1.07757
ZNF821	ENSG00000102984	1.1144	ZNF821	1.07686
BRSK2	ENSG00000174672	1.43109	BRSK2	1.0748
EPS8L1	ENSG00000131037	1.00062	EPS8L1	1.06894
FAM216A	ENSG00000204856	1.16271	FAM216A	1.06513
NPAS2	ENSG00000170485	1.42912	NPAS2	1.06084
SH2D4A	ENSG00000104611	1.52094	SH2D4A	1.05946
ERCC6L	ENSG00000186871	1.36056	ERCC6L	1.05826
DOT1L	ENSG00000104885	1.76544	DOT1L	1.05483
RP11-388C12.5	ENSG00000263321	1.95759	RP11-388C12.5	1.04758
COL4A3BP	ENSG00000113163	1.16428	COL4A3BP	1.04459
STK3	ENSG00000104375	-1.5236	STK3	1.04277
RP11-56B16.2	ENSG00000259556	1.08088	RP11-56B16.2	1.04185
TADA1	ENSG00000152382	1.48584	TADA1	1.04148
FAM166B	ENSG00000215187	1.65838	FAM166B	1.03977
PARD6G	ENSG00000178184	1.63195	PARD6G	1.03899
PPWD1	ENSG00000113593	1.82616	PPWD1	1.03558
RP11-624C23.1	ENSG00000253535	-2.18715	RP11-624C23.1	1.03536
RP11-51M24.1	ENSG00000249875	1.42253	RP11-51M24.1	1.0353
RP11-146E13.4	ENSG00000277128	1.16106	RP11-146E13.4	1.03406
LGALS2	ENSG00000100079	1.73659	LGALS2	1.03225
FUT11	ENSG00000196968	1.77583	FUT11	1.02869
ATE1-AS1	ENSG00000226864	1.48187	ATE1-AS1	1.02731
CTHRC1	ENSG00000164932	1.58418	CTHRC1	1.02702
NPSR1	ENSG00000187258	1.52522	NPSR1	1.02517
AFF4	ENSG00000072364	1.70349	AFF4	1.02379
SELO	ENSG00000073169	1.22733	SELO	1.02261
NUP50	ENSG00000093000	2.36385	NUP50	1.02221
ABCB8	ENSG00000197150	1.7568	ABCB8	1.02104
PSMC5	ENSG00000087191	1.38425	PSMC5	1.01822
IFNA1	ENSG00000197919	1.32516	IFNA1	1.01634
RGL2	ENSG00000237441	1.26398	RGL2	1.01421
TMED5	ENSG00000117500	1.0385	TMED5	1.01412
AGO2	ENSG00000123908	1.24086	AGO2	1.01396
GNG3	ENSG00000162188	1.42025	GNG3	1.0099
TMEM115	ENSG00000126062	1.09447	TMEM115	1.0083
DAAM1	ENSG00000100592	1.1132	DAAM1	1.00814
MYH7B	ENSG00000078814	1.24093	MYH7B	1.00647
VWA5B2	ENSG00000145198	2.26169	VWA5B2	1.00592
RP11-27K13.3	ENSG00000236137	1.80745	RP11-27K13.3	1.00562
FTO	ENSG00000140718	-1.21337	FTO	-1.00324
PMCH	ENSG00000183395	-1.0719	PMCH	-1.1425
MTBP	ENSG00000172167	-1.14269	MTBP	-1.1672

## Sheet: unique_to_a549_ctrl
Genename	Ensembl_ID	logFC	logCPM	PValue	FDR
IFIT3	ENSG00000119917	-2.37277	4.21889	2.07096e-24	4.62531e-23
RP11-6N17.9	ENSG00000263798	-2.24248	2.43391	1.89829e-12	1.89091e-11
RP11-510C10.2	ENSG00000224127	-2.17235	3.66177	1.30368e-23	2.71447e-22
DDX58	ENSG00000107201	-2.08945	4.50235	7.69632e-32	2.46496e-30
NAPA	ENSG00000105402	-2.08893	3.26696	1.60379e-16	2.23128e-15
SYT6	ENSG00000134207	-1.97606	3.2683	3.96606e-16	5.39571e-15
FBXO22	ENSG00000167196	-1.95056	2.95819	9.2286e-14	1.04192e-12
CTD-2396E7.10	ENSG00000268191	-1.86496	4.00216	3.99833e-21	7.51133e-20
AHNAK2	ENSG00000185567	-1.84709	3.38619	2.88912e-07	1.60828e-06
RCC1L	ENSG00000274523	-1.80394	6.78464	5.36659e-29	1.5046e-27
TTLL2	ENSG00000120440	-1.78724	2.22301	1.27798e-10	1.06199e-09
AKR1B10	ENSG00000198074	-1.75289	3.16959	1.11764e-07	6.60842e-07
RP1-63G5.8	ENSG00000272694	-1.75095	3.73149	1.4755e-15	1.92232e-14
AC072062.1	ENSG00000229267	-1.72413	3.94295	5.86007e-21	1.08107e-19
AC072062.3	ENSG00000227769	-1.70773	3.36741	4.41554e-15	5.56406e-14
NPBWR1	ENSG00000183729	-1.65972	3.07138	5.05983e-13	5.33769e-12
RINT1	ENSG00000135249	-1.65637	3.02211	2.07251e-11	1.85961e-10
RP11-229P13.22	ENSG00000229257	-1.65463	4.50316	1.41085e-22	2.78665e-21
ADCY8	ENSG00000155897	-1.65072	3.10534	1.2853e-13	1.43183e-12
THRIL	ENSG00000280634	-1.64387	7.6423	4.11597e-51	2.40289e-49
STAT1	ENSG00000115415	-1.63788	6.713	6.45035e-38	2.54265e-36
ACMSD	ENSG00000153086	-1.63613	4.67566	1.13588e-23	2.38121e-22
RP11-229P13.23	ENSG00000231864	-1.63129	4.34806	4.18013e-12	3.9956e-11
PLCG1	ENSG00000124181	-1.63081	6.01056	9.43837e-38	3.65796e-36
RP11-449J21.5	ENSG00000267128	-1.61236	6.20886	1.12159e-43	5.41651e-42
STAB1	ENSG00000010327	-1.60554	2.78287	5.5251e-07	2.92894e-06
RP11-355I22.2	ENSG00000258903	-1.57066	3.5631	5.61858e-14	6.49446e-13
RBM8A	ENSG00000265241	-1.56746	2.27602	9.07488e-09	6.17761e-08
LINC01529	ENSG00000225872	-1.56732	5.98258	4.09897e-26	1.00824e-24
MRS2	ENSG00000124532	-1.56589	1.88339	2.37576e-07	1.34689e-06
ALG1L8P	ENSG00000227620	-1.56431	4.59576	1.33113e-19	2.26121e-18
BLK	ENSG00000136573	-1.55684	2.2949	1.98612e-06	9.6269e-06
DNAH11	ENSG00000105877	-1.55456	6.77789	2.57364e-48	1.40469e-46
PLCE1-AS1	ENSG00000268894	-1.54441	4.86757	9.15093e-24	1.93154e-22
RPS24	ENSG00000138326	-1.53685	2.9951	8.9698e-06	3.95305e-05
AC091177.1	ENSG00000230113	-1.52379	2.11596	8.84813e-07	4.53669e-06
TP53I11	ENSG00000175274	-1.52001	6.32457	3.74519e-31	1.15925e-29
ITGA7	ENSG00000135424	-1.51521	3.91495	4.1365e-13	4.4059e-12
NR2F2-AS1	ENSG00000247809	-1.50991	2.67528	3.01015e-08	1.93219e-07
CTA-373H7.7	ENSG00000206028	-1.50384	3.6078	2.77411e-13	2.98581e-12
RP11-498C9.13	ENSG00000263585	-1.50046	6.68242	1.06089e-37	4.09442e-36
RP11-145A3.2	ENSG00000226349	-1.48505	1.83447	1.20121e-06	6.02172e-06
RP11-356K23.1	ENSG00000258752	-1.47989	1.94024	1.86815e-06	9.11255e-06
RP5-1142A6.10	ENSG00000278341	-1.47943	3.45947	7.13495e-12	6.70191e-11
SCTR	ENSG00000080293	-1.47538	2.0949	1.52231e-06	7.53721e-06
CGREF1	ENSG00000138028	-1.46323	4.04104	6.47e-07	3.40049e-06
BCL7A	ENSG00000110987	-1.45688	2.8859	1.16211e-08	7.81293e-08
RP11-74H8.1	ENSG00000265664	-1.45249	4.98482	4.83193e-16	6.55437e-15
RP11-168K11.2	ENSG00000237073	-1.45057	5.20681	3.71698e-28	1.01137e-26
RP11-488C13.5	ENSG00000258301	-1.43912	4.57326	1.70236e-20	3.0729e-19
ALG1L7P	ENSG00000251271	-1.42787	3.64758	7.61818e-11	6.4765e-10
RP11-728F11.3	ENSG00000254844	-1.41837	2.49308	7.04547e-07	3.67576e-06
CYP2D6	ENSG00000100197	-1.41703	2.18669	8.31822e-07	4.28644e-06
ALG1L	ENSG00000189366	-1.41687	4.48655	8.19111e-18	1.23254e-16
RP11-394B2.1	ENSG00000279569	-1.41682	7.21262	3.99632e-25	9.33217e-24
RPS3	ENSG00000149273	-1.40385	2.48337	9.35055e-05	0.000340369
AHNAK	ENSG00000124942	-1.39957	2.82369	4.96834e-06	2.26871e-05
RP11-358M14.2	ENSG00000228322	-1.39708	1.92084	4.14636e-05	0.000162749
CTD-2510F5.4	ENSG00000265415	-1.39499	6.7488	1.84714e-30	5.49612e-29
PSCA	ENSG00000167653	-1.39286	3.09977	5.15396e-09	3.6e-08
CTD-2562J17.7	ENSG00000254429	-1.39212	2.76593	1.068e-06	5.407e-06
CTD-2562J17.9	ENSG00000254963	-1.389	2.38054	5.71616e-05	0.000217577
IPPK	ENSG00000127080	-1.38324	4.83422	1.09114e-17	1.62859e-16
RPL19	ENSG00000108298	-1.38292	2.74436	0.00345098	0.00873302
AC108004.3	ENSG00000241525	-1.37818	4.44696	9.09737e-16	1.21439e-14
SYN2	ENSG00000157152	-1.37552	7.44509	2.41445e-43	1.14798e-41
MVK	ENSG00000110921	-1.37518	2.70279	9.5e-08	5.66507e-07
CTB-79E8.2	ENSG00000253445	-1.3679	3.85647	2.399e-12	2.35659e-11
SMIM14	ENSG00000163683	-1.36258	3.73039	9.57165e-13	9.89786e-12
MAFG	ENSG00000197063	-1.35039	3.15768	2.88144e-08	1.85086e-07
RP11-127I20.7	ENSG00000266994	-1.34374	2.55439	1.1686e-05	5.0654e-05
STIP1	ENSG00000168439	-1.34061	2.33137	1.27917e-05	5.51617e-05
CTB-174D11.1	ENSG00000248222	-1.33941	2.25708	3.06024e-06	1.43872e-05
RP5-981O7.2	ENSG00000229591	-1.339	5.38261	1.53594e-17	2.2668e-16
FAM63A	ENSG00000143409	-1.3387	2.34546	1.05186e-05	4.58741e-05
RP3-508I15.14	ENSG00000225450	-1.33788	6.72996	3.03072e-19	4.96542e-18
MYDGF	ENSG00000074842	-1.33195	5.36875	1.93454e-21	3.67921e-20
RP13-131K19.6	ENSG00000272434	-1.32788	6.91855	5.17084e-16	6.98329e-15
AC012146.7	ENSG00000234327	-1.32462	1.97538	0.000106017	0.000382591
DOCK1	ENSG00000150760	-1.31967	5.86994	7.1725e-21	1.32054e-19
KSR1	ENSG00000141068	-1.31618	5.83114	1.75694e-22	3.46282e-21
RP11-83J21.3	ENSG00000236658	-1.30802	3.49285	1.14943e-10	1e-09
CTC-564N23.2	ENSG00000250615	-1.3031	4.84721	1.42651e-15	1.86112e-14
SFPQ	ENSG00000116560	-1.30038	2.3112	0.00381495	0.00954929
THOC6	ENSG00000131652	-1.29999	1.67195	0.000393594	0.00126147
LA16c-444G7.1	ENSG00000261273	-1.29459	2.95437	1.05625e-06	5.35027e-06
DBN1	ENSG00000113758	-1.29294	1.5373	0.000266221	0.000886186
PNN	ENSG00000100941	-1.28534	2.17386	0.00322069	0.00822927
RP5-1113E3.3	ENSG00000203469	-1.28096	4.47264	3.52237e-15	4.46295e-14
KRTCAP3	ENSG00000157992	-1.27378	5.09671	1.24124e-15	1.63094e-14
WNT5A-AS1	ENSG00000244586	-1.2692	1.74751	3.96351e-05	0.000156037
ATP6V0E2-AS1	ENSG00000204934	-1.26748	7.11884	2.51534e-22	4.89483e-21
RP11-367J11.2	ENSG00000245748	-1.26647	7.28813	4.22518e-32	1.39688e-30
CHDH	ENSG00000016391	-1.26558	2.85994	0.00022525	0.000759116
MYLK-AS1	ENSG00000239523	-1.26458	8.09687	1.15376e-38	4.66769e-37
DHRS4	ENSG00000157326	-1.25489	2.85557	1.2222e-05	5.2853e-05
HDDC2	ENSG00000111906	-1.25449	7.5569	6.78773e-39	2.80763e-37
RP11-310I9.1	ENSG00000248601	-1.25316	3.5592	1.23009e-09	9.17986e-09
ELF3	ENSG00000163435	-1.25202	2.46483	1.42845e-05	6.09155e-05
RP11-77K12.4	ENSG00000203472	-1.24838	2.65147	2.57693e-07	1.44848e-06
RP3-508I15.19	ENSG00000230149	-1.23863	1.78634	5.8346e-05	0.000221657
ZBTB45P2	ENSG00000226065	-1.23436	2.01084	6.00289e-05	0.000227395
PLG	ENSG00000122194	-1.23376	2.27214	3.10007e-05	0.000123732
ARHGEF3-AS1	ENSG00000240198	-1.23182	2.20942	4.37611e-05	0.000171039
IL17D	ENSG00000172458	-1.23094	3.2213	6.27946e-08	3.83587e-07
ATPAF2	ENSG00000171953	-1.22859	4.81684	1.27424e-16	1.78355e-15
RP11-85G18.6	ENSG00000262412	-1.22487	2.46504	1.07391e-06	5.43077e-06
RIC1	ENSG00000107036	-1.22471	5.20723	7.65244e-14	8.70359e-13
SLC7A11-AS1	ENSG00000250033	-1.22186	11.3921	8.26309e-40	3.52865e-38
NIFKP6	ENSG00000268144	-1.21952	2.00882	1.36275e-05	5.84379e-05
MRPS7	ENSG00000125445	-1.21649	3.16519	6.64763e-08	4.03937e-07
TCEAL9	ENSG00000185222	-1.21372	1.53974	0.00176033	0.00483685
RP11-488C13.6	ENSG00000259081	-1.21333	5.66666	6.7946e-20	1.16928e-18
FBXL22	ENSG00000197361	-1.2119	2.02146	0.000181694	0.000625119
ZBTB45P1	ENSG00000225108	-1.20999	2.24188	1.55732e-05	6.6136e-05
GALK1	ENSG00000108479	-1.20929	7.75009	4.16606e-09	2.95371e-08
RP11-67L3.5	ENSG00000242396	-1.20674	3.22718	4.02e-06	1.85772e-05
RP11-681H18.2	ENSG00000277801	-1.20181	4.07892	7.32114e-10	5.58101e-09
AP003419.11	ENSG00000256514	-1.19817	1.30412	0.0061736	0.0146577
TSEN54	ENSG00000182173	-1.19635	3.24544	2.72606e-06	1.29281e-05
RP11-455O6.2	ENSG00000262115	-1.19625	3.49038	6.88385e-08	4.16645e-07
C1orf35	ENSG00000143793	-1.19559	3.46332	5e-09	3.49299e-08
RP11-875O11.1	ENSG00000245025	-1.19472	8.18107	4.75945e-21	8.84036e-20
GOLGA4	ENSG00000144674	-1.19411	1.81668	0.00236927	0.00629802
RCE1	ENSG00000173653	-1.19375	4.1847	9.09359e-12	8.43008e-11
RP11-403F21.4	ENSG00000283162	-1.19313	6.15239	4.74467e-16	6.44548e-15
PLD4	ENSG00000166428	-1.19175	7.64166	5.81588e-32	1.90233e-30
NALCN-AS1	ENSG00000233009	-1.19146	3.14904	9.52769e-08	5.68089e-07
TOP2A	ENSG00000131747	-1.18657	2.39635	0.0032963	0.00840383
ZNF710	ENSG00000140548	-1.1863	4.58969	3.14638e-15	4.00306e-14
DENND1C	ENSG00000205744	-1.18564	4.17358	3.04811e-08	1.95249e-07
PRPF8	ENSG00000174231	-1.18491	2.23215	2.04946e-05	8.46583e-05
PDZD11	ENSG00000120509	-1.18221	3.32916	4.94004e-08	3.07417e-07
AC005237.4	ENSG00000225521	-1.18084	3.17524	6.78321e-08	4.11093e-07
RP11-484K9.4	ENSG00000272844	-1.17957	2.82444	1.96738e-05	8.17071e-05
SNHG7	ENSG00000233016	-1.17889	5.40005	6.83656e-14	7.79486e-13
GAS6	ENSG00000183087	-1.17828	7.83869	3.43394e-24	7.52367e-23
RP11-463J10.3	ENSG00000259007	-1.17756	4.22101	1.33066e-08	8.88481e-08
FARP1-AS1	ENSG00000231194	-1.17742	3.06778	1.9151e-05	7.97872e-05
CTD-3193O13.11	ENSG00000268120	-1.17699	2.16149	0.000115676	0.000414368
RNASEH2B-AS1	ENSG00000233672	-1.17517	2.12223	0.000151418	0.000530655
ALG1L9P	ENSG00000248671	-1.1749	5.52676	2.43477e-19	4.04655e-18
GPR20	ENSG00000204882	-1.17154	3.89164	3.93499e-08	2.48776e-07
PCDH9-AS1	ENSG00000234527	-1.17051	3.66896	1.54504e-09	1.14286e-08
CYB561D2	ENSG00000114395	-1.16816	2.04981	0.000563434	0.00173933
RBM3	ENSG00000102317	-1.16214	1.2417	0.00384767	0.00962858
CTD-2540B15.11	ENSG00000267580	-1.15555	3.73353	1.44142e-08	9.58591e-08
PRSS54	ENSG00000103023	-1.15296	4.75374	8.18344e-13	8.49089e-12
MYBBP1A	ENSG00000132382	-1.14907	2.45023	3.90213e-06	1.80508e-05
IQCA1	ENSG00000132321	-1.14712	3.1061	0.000255789	0.000854544
RPL23	ENSG00000125691	-1.14187	1.419	0.0175006	0.0366293
RP4-669P10.16	ENSG00000232710	-1.14122	1.63932	0.00248849	0.00657177
DEPDC1-AS1	ENSG00000234264	-1.13938	3.84051	1.85712e-09	1.36495e-08
AC008937.3	ENSG00000225230	-1.13932	2.4465	2.33914e-05	9.55545e-05
TUBA1B	ENSG00000123416	-1.1392	1.99316	0.000134056	0.000474677
SH3BP5-AS1	ENSG00000224660	-1.13769	6.66582	6.41467e-27	1.64358e-25
ADPRHL1	ENSG00000153531	-1.13699	2.23305	0.000166581	0.00057678
KRT7	ENSG00000135480	-1.13438	3.81694	3.95536e-05	0.000155782
RP11-59N23.1	ENSG00000255644	-1.13331	2.18192	4.88384e-05	0.000188725
DDX21	ENSG00000165732	-1.13038	1.83786	0.00285301	0.00742347
RP13-1032I1.10	ENSG00000262660	-1.13026	1.69449	0.000551257	0.00170852
ACBD6	ENSG00000230124	-1.12826	4.33282	9.06269e-11	7.64815e-10
RP11-6N17.6	ENSG00000264019	-1.12735	8.10328	8.18521e-31	2.50001e-29
CTA-363E6.6	ENSG00000260592	-1.12711	3.76373	1.83543e-10	1.49032e-09
YWHAE	ENSG00000108953	-1.12524	1.43478	0.00173571	0.00477915
HSPA4	ENSG00000170606	-1.12351	1.89163	0.00186381	0.00509235
RP11-49I4.3	ENSG00000249474	-1.1207	5.75854	1.41962e-19	2.40709e-18
TCEAL4	ENSG00000133142	-1.11814	2.57381	0.000525915	0.00163887
EPHA5-AS1	ENSG00000250846	-1.1172	3.22849	1.58649e-06	7.82974e-06
GPN3	ENSG00000111231	-1.11693	3.23363	2.52165e-07	1.41914e-06
ILF3	ENSG00000129351	-1.11599	2.07958	0.00545083	0.0131641
TPM2	ENSG00000198467	-1.11401	2.62172	0.000430056	0.00136787
DCUN1D2	ENSG00000150401	-1.11059	2.42365	3.67117e-05	0.000145023
GRTP1-AS1	ENSG00000225083	-1.11039	2.3008	3.06553e-05	0.000122621
RP11-524F11.2	ENSG00000264666	-1.11034	3.8704	6.08364e-07	3.20294e-06
VPS4A	ENSG00000132612	-1.10434	7.52523	1.32027e-33	4.57825e-32
CLNS1A	ENSG00000074201	-1.10366	4.33098	1.3522e-09	1e-08
CTD-2319I12.2	ENSG00000267416	-1.10318	3.51687	2.72e-07	1.52414e-06
STK24	ENSG00000102572	-1.10034	5.7024	4.71041e-18	7.19352e-17
XRCC6	ENSG00000196419	-1.09687	1.32674	0.0020868	0.00562169
FLG	ENSG00000143631	-1.09381	5.21799	3.95732e-13	4.22481e-12
RP11-545P7.4	ENSG00000257286	-1.09299	6.17771	1.42242e-12	1.43864e-11
PTPRH	ENSG00000080031	-1.0886	2.04619	0.0010684	0.00310489
CTB-49A3.2	ENSG00000248245	-1.08773	4.76504	5.0705e-09	3.5432e-08
RP11-285E9.6	ENSG00000263718	-1.08698	4.09062	1.44071e-06	7.14854e-06
AC009133.15	ENSG00000259952	-1.08625	5.25798	6.38441e-06	2.86151e-05
PPIE	ENSG00000084072	-1.08598	5.57231	1.94836e-19	3.26165e-18
POLE3	ENSG00000148229	-1.08577	2.23297	0.000955804	0.00280151
RP11-7M8.2	ENSG00000256811	-1.08528	2.34938	0.000224608	0.000757334
ZSCAN16	ENSG00000196812	-1.0842	1.40673	0.00242504	0.00642743
CTD-2196E14.5	ENSG00000261266	-1.0812	7.30594	2.25699e-15	2.89548e-14
RP11-532E4.2	ENSG00000255177	-1.07996	8.08597	6.41467e-08	3.90812e-07
ANXA2P2	ENSG00000231991	-1.07881	2.22663	0.00141682	0.00399167
RPS25	ENSG00000118181	-1.0763	3.5263	0.000853995	0.00253125
BSG	ENSG00000172270	-1.07503	3.42662	4.06898e-07	2.213e-06
RP11-74C13.4	ENSG00000261065	-1.07436	3.28022	5.922e-06	2.67115e-05
RP11-17A1.3	ENSG00000246225	-1.07167	4.09541	5.25819e-08	3.2486e-07
SSBP4	ENSG00000130511	-1.07123	1.38954	0.00122318	0.0035036
CTD-2576F9.2	ENSG00000270017	-1.0691	3.37609	2.32135e-06	1.11289e-05
LTBR	ENSG00000111321	-1.06792	4.06665	3.84152e-10	3e-09
RNF11	ENSG00000123091	-1.06764	3.03769	0.000108155	0.000389239
ALG1	ENSG00000033011	-1.06638	5.77091	3.52313e-11	3.08032e-10
RP11-65B7.2	ENSG00000281883	-1.06603	1.47109	0.00617049	0.0146541
RP11-703I16.1	ENSG00000267480	-1.06344	2.31441	0.0003594	0.00116238
CTC-458I2.2	ENSG00000251675	-1.06152	7.49249	2.77493e-24	6.09427e-23
AC114271.2	ENSG00000274425	-1.06035	4.33663	1.0726e-06	5.42712e-06
RP11-419I17.1	ENSG00000283674	-1.05997	4.8879	6.94282e-13	7.21178e-12
RP11-701H24.3	ENSG00000257647	-1.05968	4.41279	1e-09	7.55239e-09
SARNP	ENSG00000205323	-1.05656	4.75757	2.1033e-10	1.69885e-09
AP003419.16	ENSG00000255949	-1.05497	7.13958	1.80065e-15	2.32948e-14
TEX9	ENSG00000151575	-1.05284	5.7554	1.25459e-16	1.75871e-15
RP11-802E16.3	ENSG00000255031	-1.05268	5.0659	1.32441e-12	1.34514e-11
VPS9D1	ENSG00000075399	-1.05243	7.10153	9.43109e-28	2.49978e-26
RP11-54O7.3	ENSG00000223764	-1.05069	4.37472	1.80806e-07	1.043e-06
RP11-332H18.5	ENSG00000267131	-1.04884	5.85644	3.00557e-14	3.56342e-13
CTD-3239E11.2	ENSG00000253197	-1.04701	6.67286	3.43012e-22	6.66094e-21
C1QBPP2	ENSG00000213409	-1.04601	1.40574	0.00576645	0.0138286
RP11-524F11.1	ENSG00000265511	-1.04561	2.76958	1.75811e-05	7.37463e-05
PRRT3	ENSG00000163704	-1.04551	4.44497	1.84655e-11	1.66496e-10
RP11-75I2.3	ENSG00000279333	-1.04509	6.14712	1.37713e-16	1.91883e-15
ECE2	ENSG00000145194	-1.04461	2.41489	0.000152619	0.000534456
RP11-26J3.1	ENSG00000249328	-1.03975	1.51691	0.00107993	0.00313445
CTD-2154I11.2	ENSG00000250240	-1.03841	3.77915	1.57124e-08	1.04e-07
AC005540.3	ENSG00000235852	-1.03768	4.9125	9.05486e-08	5.41296e-07
MAFK	ENSG00000198517	-1.03755	4.35468	6.32173e-08	3.85914e-07
LTA4H	ENSG00000111144	-1.03615	1.15836	0.00404421	0.0100604
RP1-102D24.5	ENSG00000232363	-1.03599	2.90203	7.72909e-05	0.000285973
LPO	ENSG00000167419	-1.03446	3.86759	1.12237e-07	6.6321e-07
PCDH9-AS2	ENSG00000228842	-1.03142	2.94379	0.000598761	0.00183854
RPL8	ENSG00000161016	-1.02982	2.02842	0.00160748	0.00446971
STEAP3-AS1	ENSG00000229867	-1.02977	6.27018	2.32461e-14	2.7847e-13
GALC	ENSG00000054983	-1.02793	2.56296	2.58681e-05	0.000105067
EEF1A1P5	ENSG00000196205	-1.02444	2.67879	0.0162022	0.0342773
RP11-311F12.2	ENSG00000264785	-1.02375	8.73451	2.04923e-08	1.34534e-07
C2orf16	ENSG00000221843	-1.0235	4.02594	9.06292e-10	6.85778e-09
RP11-128P10.1	ENSG00000257579	-1.02323	6.32477	3.3127e-13	3.55307e-12
RECQL4	ENSG00000160957	-1.02228	4.34911	4.56784e-07	2.45674e-06
CHD3	ENSG00000170004	-1.02164	2.5048	0.000894777	0.00263941
RP11-33N14.3	ENSG00000277873	-1.02083	5.05575	5.23457e-11	4.52518e-10
PIAS2	ENSG00000078043	-1.01914	2.48025	0.000260822	0.000870099
ENPP7P10	ENSG00000249767	-1.01882	3.04253	1.37337e-05	5.87839e-05
EPB41L4A-AS1	ENSG00000224032	-1.01549	4.92345	6.1843e-14	7.08621e-13
PSMA8	ENSG00000154611	-1.01477	6.96086	3.42422e-21	6.44592e-20
ZC3H14	ENSG00000100722	-1.01288	4.12982	1e-08	6.78345e-08
PRR19	ENSG00000188368	-1.01266	4.62776	2.44877e-07	1.38319e-06
AP000688.11	ENSG00000236677	-1.01263	1.89531	0.000770078	0.00230548
ICAM3	ENSG00000076662	-1.01201	3.05101	0.000209163	0.00070957
TLN1	ENSG00000137076	-1.01138	2.41856	0.000672759	0.00204129
TEX22	ENSG00000226174	-1.01013	4.99252	4.93858e-12	4.7108e-11
RP11-80H5.6	ENSG00000225836	-1.00882	1.75852	0.00297044	0.00768348
PLXDC1	ENSG00000161381	-1.00692	3.64736	2.26056e-06	1.08714e-05
BTBD11	ENSG00000151136	-1.00681	3.7324	3.4264e-07	1.88575e-06
DEGS2	ENSG00000168350	-1.00385	2.9724	0.000327527	0.00106866
RSPH14	ENSG00000100218	-1.00181	6.18599	1.76436e-14	2.12739e-13
AC016995.3	ENSG00000231367	-1.00173	10.8792	2.2621e-20	4.04372e-19
ELP4	ENSG00000109911	-1.00028	1.59825	0.00457341	0.0112374
FAM149A	ENSG00000109794	1.00178	2.26939	0.000467217	0.00147539
RBMS1	ENSG00000153250	1.00264	2.36679	0.000530733	0.00165165
AC068491.2	ENSG00000229118	1.00295	2.36736	0.000884936	0.00261456
YEATS2-AS1	ENSG00000233885	1.00397	6.702	2.47162e-22	4.85068e-21
CMC1	ENSG00000187118	1.00421	7.32073	2.67264e-28	7.29361e-27
RP11-567L7.5	ENSG00000266002	1.00437	3.68272	1.76956e-08	1.16839e-07
DHX29	ENSG00000067248	1.00446	1.99162	0.000572271	0.00176248
RP1-149A16.17	ENSG00000241954	1.00483	2.05982	0.00217025	0.00581592
SLC22A2	ENSG00000112499	1.00554	2.86329	0.000318312	0.00104234
CBFA2T2	ENSG00000078699	1.0057	2.87268	3.44029e-05	0.000136605
SLC24A1	ENSG00000074621	1.00589	5.29811	1.6073e-12	1.61853e-11
RUNX3	ENSG00000020633	1.00832	2.59471	0.000518089	0.00161611
AC010132.11	ENSG00000234983	1.01058	4.06277	6.51557e-08	3.96436e-07
IL4	ENSG00000113520	1.01591	1.63709	0.00242562	0.00642743
POU2F2	ENSG00000028277	1.01593	2.07054	0.000137754	0.00048721
EBNA1BP2	ENSG00000117395	1.0163	4.396	1.38414e-06	6.88633e-06
PHKA1	ENSG00000067177	1.01673	2.01243	0.00307586	0.00790519
THRA	ENSG00000126351	1.0169	4.11779	1.88977e-09	1.38563e-08
RP11-102L12.2	ENSG00000259326	1.01703	1.84066	0.000569808	0.00175607
MSC-AS1	ENSG00000235531	1.01704	8.08107	4.07745e-28	1.10619e-26
BCAS1	ENSG00000064787	1.01767	1.24133	0.0059036	0.0140929
DDX41	ENSG00000183258	1.01874	1.80355	0.00175026	0.00481491
ARG1	ENSG00000118520	1.01977	1.52569	0.00357214	0.00899766
RP11-253I19.3	ENSG00000255670	1.02268	5.82267	3.62302e-18	5.58843e-17
LGALS8-AS1	ENSG00000223776	1.02414	4.55972	7.89968e-12	7.38264e-11
NIPAL1	ENSG00000163293	1.02781	2.80746	0.000376863	0.0012129
CHKA	ENSG00000110721	1.02892	7.6873	6.74384e-26	1.64564e-24
MARCH4	ENSG00000144583	1.02944	1.88997	0.000615534	0.00188502
ZC3HAV1	ENSG00000105939	1.02994	1.15582	0.00739632	0.0172413
GGPS1	ENSG00000152904	1.03102	3.68733	7.55514e-07	3.92833e-06
ADAR	ENSG00000160710	1.03143	1.72306	0.0015423	0.00430704
ANXA4	ENSG00000196975	1.03175	2.65395	5.71775e-05	0.000217577
MICD	ENSG00000229390	1.03285	5.2651	5.96585e-15	7.40632e-14
HIPK2	ENSG00000064393	1.0337	1.32099	0.00206429	0.00557081
RP11-582E3.2	ENSG00000256226	1.03881	3.08212	1.00069e-05	4.38082e-05
ELMOD3	ENSG00000115459	1.03918	5.79868	8.53019e-14	9.66716e-13
VPS51	ENSG00000149823	1.03933	1.5066	0.00179044	0.0049108
RP11-542C16.1	ENSG00000263171	1.04014	7.48666	2.66611e-20	4.73062e-19
AC079790.2	ENSG00000225214	1.04025	1.16677	0.0125787	0.0273581
DEFB107B	ENSG00000198129	1.04062	2.23974	9.33462e-05	0.000339923
CCDC80	ENSG00000091986	1.04106	3.38272	5.74833e-06	2.59787e-05
PDE7B	ENSG00000171408	1.04165	5.30608	6.24861e-11	5.34668e-10
RNF145	ENSG00000145860	1.04227	2.42292	0.00130096	0.00369801
AL109761.5	ENSG00000244676	1.04315	4.15906	1e-09	7.55239e-09
HDAC9	ENSG00000048052	1.04647	4.03801	1.9e-08	1.24864e-07
RP11-498M5.2	ENSG00000251309	1.04709	4.14419	9.01605e-11	7.61575e-10
DSP	ENSG00000096696	1.0499	1.94203	0.000260943	0.000870188
ATG2B	ENSG00000066739	1.05054	2.65884	1.22923e-05	5.31072e-05
ABHD17C	ENSG00000136379	1.05059	2.03318	0.000275976	0.000914897
Y_RNA	ENSG00000201820	1.05109	2.04541	0.000282982	0.000934896
ATP6AP1	ENSG00000071553	1.05337	1.41782	0.00106304	0.00309322
FOXA1	ENSG00000129514	1.05362	3.03551	2.94409e-06	1.39049e-05
FUNDC2	ENSG00000165775	1.05449	1.23173	0.00234858	0.00624842
MATN2	ENSG00000132561	1.05454	2.25428	4.61615e-05	0.000179432
TMEM186	ENSG00000184857	1.05793	4.30798	1.48274e-08	9.84649e-08
LIFR-AS1	ENSG00000244968	1.05835	1.48529	0.00175223	0.00481889
THCAT158	ENSG00000263293	1.05876	8.30259	2.33675e-33	8.01272e-32
RP11-736K20.5	ENSG00000255471	1.06095	2.46039	0.000162875	0.000565222
ATP2B1	ENSG00000070961	1.06103	2.30193	5.50221e-05	0.000210329
AP000432.1	ENSG00000280594	1.06132	2.44908	7.75898e-05	0.000286964
TUB	ENSG00000166402	1.06947	5.83819	1.49244e-18	2.34518e-17
POR	ENSG00000127948	1.06966	3.69371	1.21222e-07	7.12652e-07
GGTA1P	ENSG00000204136	1.07141	1.26746	0.00211826	0.00569646
EP300-AS1	ENSG00000231993	1.07235	1.39847	0.00115472	0.00332641
WDFY2	ENSG00000139668	1.07254	1.54791	0.00112495	0.00325118
SUV39H2	ENSG00000152455	1.07441	5.81539	2.86985e-16	3.93336e-15
CALM2P2	ENSG00000229097	1.07451	3.97175	7.27752e-10	5.55235e-09
SLC45A4	ENSG00000022567	1.07542	2.44624	0.000588292	0.00180941
RP11-4B16.4	ENSG00000278330	1.07584	2.64851	1.76394e-05	7.39571e-05
HCG17	ENSG00000270604	1.07586	4.99477	4.78545e-15	6.01376e-14
CHKB	ENSG00000100288	1.07626	5.96571	9.49845e-23	1.90051e-21
RBM23	ENSG00000100461	1.07795	1.31669	0.00387895	0.00968844
HUS1	ENSG00000136273	1.08187	3.2668	5.44362e-08	3.35866e-07
MSI2	ENSG00000153944	1.08199	2.00118	0.000164613	0.000571039
AC004906.3	ENSG00000237286	1.08385	1.81227	0.000964178	0.00282426
RP4-789D17.5	ENSG00000271914	1.0843	1.2107	0.00122227	0.00350239
OSCAR	ENSG00000170909	1.08723	3.14904	1.67234e-06	8.20952e-06
FAM47E	ENSG00000189157	1.08823	3.41549	2.96432e-06	1.3979e-05
AC007461.2	ENSG00000226101	1.08836	2.05037	0.000188817	0.000647211
GS1-114I9.1	ENSG00000272638	1.09232	5.17107	1.10718e-13	1.24091e-12
ADGRV1	ENSG00000164199	1.09281	3.08282	1.5318e-06	7.5801e-06
SCAPER	ENSG00000140386	1.09469	1.72304	0.00195941	0.00531109
NPNT	ENSG00000168743	1.09629	1.59802	0.00781075	0.0180749
RP11-412H8.2	ENSG00000258175	1.09818	5.28503	7.59597e-12	7.11322e-11
LSM4	ENSG00000130520	1.09851	3.40537	7.16887e-05	0.00026739
AC002310.13	ENSG00000260869	1.0992	3.46309	2.71466e-06	1.28807e-05
PDE3A	ENSG00000172572	1.09926	3.1756	3.21468e-07	1.77984e-06
GBF1	ENSG00000107862	1.0998	2.0166	0.000816522	0.00243033
AL356585.1	ENSG00000279081	1.10023	1.3903	0.00112751	0.00325718
MTHFD2	ENSG00000065911	1.10177	3.33631	7.37096e-09	5.04001e-08
SLC31A1	ENSG00000136868	1.10245	2.44411	7.35121e-05	0.000273528
RP11-656E20.5	ENSG00000255958	1.10469	3.44072	4.28315e-07	2.31581e-06
ADD1	ENSG00000087274	1.10824	1.93789	0.000254368	0.000850106
SUSD1	ENSG00000106868	1.11027	1.61574	0.000284266	0.000938802
TCF4-AS1	ENSG00000267028	1.11154	3.00839	4.06963e-05	0.000160078
AP001258.4	ENSG00000245571	1.11184	2.18533	1.59792e-05	6.7611e-05
PPP2R2A	ENSG00000221914	1.11314	1.43143	0.00274591	0.00717515
ELK3	ENSG00000111145	1.11414	5.07366	3.35995e-16	4.58464e-15
RP11-46A10.5	ENSG00000243155	1.11681	4.37815	1.5232e-11	1.38697e-10
STK11	ENSG00000118046	1.11995	1.55699	0.00231442	0.00616821
NOX1	ENSG00000007952	1.12098	2.40807	2.23114e-05	9.15075e-05
RBMS2	ENSG00000076067	1.12252	4.57877	1.65786e-12	1.6643e-11
RERE	ENSG00000142599	1.12263	2.52815	2.52182e-06	1.20462e-05
WEE2	ENSG00000214102	1.12499	1.70659	0.00102084	0.00297793
RP1-80N2.4	ENSG00000279368	1.12646	2.47117	6.60126e-05	0.000248328
NOD1	ENSG00000106100	1.12683	4.96092	3.60389e-12	3.46997e-11
SLCO1B3	ENSG00000111700	1.12993	3.70715	1.72506e-05	7.25577e-05
RP11-344N10.2	ENSG00000237768	1.13103	7.42839	9.25598e-31	2.81773e-29
LCAT	ENSG00000213398	1.13427	2.62755	3.35363e-06	1.56865e-05
RP11-274H2.2	ENSG00000243415	1.13516	13.0958	1.83338e-48	1.00662e-46
RP11-243J16.7	ENSG00000236559	1.14056	3.95766	8.79422e-07	4.51407e-06
CD101	ENSG00000134256	1.14193	2.62999	1.11448e-05	4.83992e-05
RP11-459E5.1	ENSG00000253125	1.14206	1.71008	0.0004954	0.00155322
PRKCH	ENSG00000027075	1.1427	4.43973	2.00788e-10	1.62462e-09
CDK19	ENSG00000155111	1.14301	2.05245	5.56105e-05	0.000212402
DPYD-AS1	ENSG00000232878	1.14307	4.27415	2.70773e-12	2.64858e-11
CEPT1	ENSG00000134255	1.14309	3.38579	2.58499e-07	1.45213e-06
RP11-251G23.2	ENSG00000223886	1.14424	1.50129	0.000187583	0.000643462
RP11-385F5.4	ENSG00000230325	1.1469	8.05626	6.20866e-35	2.28162e-33
RP11-977G19.5	ENSG00000258199	1.14906	2.70071	6.31967e-05	0.000238416
TTC7A	ENSG00000068724	1.14914	4.62387	4.14425e-15	5.22935e-14
UFSP2	ENSG00000109775	1.15057	3.38254	6.91332e-09	4.74468e-08
PIK3CB	ENSG00000051382	1.15075	1.80771	0.000271379	0.000901406
LINC01481	ENSG00000257815	1.15143	2.82077	5.857e-06	2.64568e-05
RP4-728D4.2	ENSG00000239636	1.15156	2.2119	0.000276036	0.000914897
TMEM92	ENSG00000167105	1.15406	4.09708	8.46069e-10	6.41261e-09
ENDOU	ENSG00000111405	1.15417	2.06716	9.3735e-05	0.00034107
PSMG3-AS1	ENSG00000230487	1.1544	2.07027	0.00174936	0.00481386
TRIM56	ENSG00000169871	1.15587	1.50636	0.000203521	0.000693156
ATP5G1P4	ENSG00000227440	1.15728	3.66438	3.17071e-07	1.75656e-06
PNPT1	ENSG00000138035	1.15779	2.31256	1.94146e-05	8.07032e-05
RP1-197B17.7	ENSG00000280054	1.15992	1.93593	2.16033e-05	8.89592e-05
NUP155	ENSG00000113569	1.16007	1.72068	0.00010712	0.000386117
CNOT3	ENSG00000088038	1.16112	3.93202	2.85058e-08	1.83232e-07
ICMT	ENSG00000116237	1.16492	5.17058	1.68572e-18	2.63543e-17
RORA-AS1	ENSG00000245534	1.16661	2.14501	0.00012821	0.000455199
LINC01588	ENSG00000214900	1.16713	3.57082	3.35716e-10	2.66722e-09
PRKD1	ENSG00000184304	1.16734	1.4846	0.000737294	0.00221741
USP35	ENSG00000118369	1.16914	1.67082	0.000195254	0.000667539
IFIT1	ENSG00000185745	1.17294	3.52371	9.51705e-07	4.86345e-06
TRAF2	ENSG00000127191	1.1743	3.1722	9.66727e-09	6.54706e-08
NRSN1	ENSG00000152954	1.17507	2.19606	1.41566e-05	6.04259e-05
RP11-73E17.2	ENSG00000258738	1.17877	4.28907	4.08341e-10	3.21377e-09
TMPRSS11D	ENSG00000153802	1.18143	1.76614	2.32757e-05	9.51241e-05
ADORA2A-AS1	ENSG00000178803	1.1815	3.86441	2.41545e-11	2.15059e-10
ACOT2	ENSG00000119673	1.18215	5.5833	1.84343e-23	3.79549e-22
YPEL4	ENSG00000166793	1.18394	4.01823	4.10966e-11	3.58633e-10
DOCK4-AS1	ENSG00000225572	1.186	4.40005	2.67878e-12	2.62304e-11
ARNT2	ENSG00000172379	1.18753	1.38499	0.000669821	0.00203439
RSBN1L	ENSG00000187257	1.19103	1.47394	0.000956198	0.00280177
P4HA2	ENSG00000072682	1.19266	3.74149	3.16748e-09	2.27192e-08
THADA	ENSG00000115970	1.1934	4.90613	1.21597e-18	1.92056e-17
SYN3	ENSG00000185666	1.19625	3.55161	4.79e-07	2.5656e-06
RPTOR	ENSG00000141564	1.19636	2.49916	2.10539e-05	8.68133e-05
RP11-439H8.4	ENSG00000237324	1.19676	2.79028	4.76684e-07	2.55487e-06
CYP51A1-AS1	ENSG00000188693	1.19703	2.76208	2.99251e-05	0.000119856
ITGB6	ENSG00000115221	1.19769	2.92518	6.50557e-07	3.41339e-06
OXNAD1	ENSG00000154814	1.19889	5.96175	2.33584e-21	4.43329e-20
RP11-327F22.4	ENSG00000260616	1.20014	7.27669	9.24867e-39	3.79155e-37
RP11-585P4.5	ENSG00000257497	1.20067	2.8297	1.00343e-07	5.96752e-07
AC092597.3	ENSG00000248254	1.20083	5.65266	4.08124e-24	8.87862e-23
SLC35A4	ENSG00000176087	1.20091	1.4234	0.00102642	0.00299327
FAM167A	ENSG00000154319	1.20303	1.89332	4.9947e-05	0.000192686
RMI2	ENSG00000175643	1.20353	5.21012	9.99464e-17	1.40749e-15
ZNF865	ENSG00000261221	1.20479	3.2449	2.38793e-07	1.35213e-06
HOXD9	ENSG00000128709	1.20495	1.65663	0.000471977	0.0014865
ACBD5	ENSG00000107897	1.20623	1.92283	2.50019e-05	0.000101773
MFSD13A	ENSG00000138111	1.20657	4.45725	7.97185e-16	1.06569e-14
ADAMTS9-AS1	ENSG00000241158	1.20678	3.39739	1.94983e-06	9.46091e-06
UBE2Q2P12	ENSG00000197627	1.20694	1.55066	0.00266826	0.00699604
DNM3	ENSG00000197959	1.2113	4.17375	1.8022e-09	1.32776e-08
TSPAN11	ENSG00000110900	1.21239	4.47705	2.15007e-12	2.12109e-11
ZFYVE9	ENSG00000157077	1.21244	2.97007	8.93122e-07	4.57675e-06
AC034220.3	ENSG00000233006	1.21387	6.84911	4.09387e-29	1.15128e-27
NR2F1-AS1	ENSG00000237187	1.2151	4.72896	3.40982e-12	3.28771e-11
DIXDC1	ENSG00000150764	1.21609	1.57782	0.000183152	0.00062943
NAPA-AS1	ENSG00000268061	1.21645	9.72122	1.627e-30	4.88841e-29
CASC8	ENSG00000246228	1.21686	1.99816	2.85789e-05	0.000115064
AC098828.2	ENSG00000234378	1.21797	2.54713	1.5595e-06	7.70478e-06
RP11-717K11.2	ENSG00000281028	1.2259	2.2503	0.000115139	0.000412604
SLCO1A2	ENSG00000084453	1.22743	5.73079	1.01451e-19	1.73293e-18
RAPGEF4-AS1	ENSG00000228016	1.22852	1.50552	0.000763647	0.00228846
NPHS1	ENSG00000161270	1.22891	4.5497	7.75955e-14	8.81454e-13
RPUSD3	ENSG00000156990	1.22991	1.74439	0.000277006	0.000917453
PIP4K2B	ENSG00000276293	1.23106	4.4876	2.50927e-15	3.21019e-14
POPDC3	ENSG00000132429	1.23271	4.05638	2.34982e-11	2.09621e-10
SLC44A5	ENSG00000137968	1.23766	4.81104	2.39652e-13	2.59759e-12
RP11-336K24.12	ENSG00000273002	1.23909	2.0166	8.1247e-06	3.60473e-05
IFI16	ENSG00000163565	1.24084	1.27925	0.000776835	0.00232345
ZNF341	ENSG00000131061	1.24149	1.32752	0.000302742	0.00099554
CLASP1	ENSG00000074054	1.24225	3.3199	3.40535e-09	2.43307e-08
SMUG1	ENSG00000123415	1.24608	3.59495	2.22501e-10	1.79245e-09
BRE	ENSG00000158019	1.24691	1.94989	1.61493e-05	6.82681e-05
NDUFB6	ENSG00000165264	1.24822	3.1659	6.92233e-07	3.61765e-06
RABGAP1L	ENSG00000152061	1.25022	5.91024	5.33042e-31	1.63893e-29
ALOX12P2	ENSG00000262943	1.25067	3.53002	3.04323e-11	2.68363e-10
RP4-714D9.2	ENSG00000241073	1.25158	9.59443	9.29169e-38	3.61631e-36
RP11-512N21.3	ENSG00000257202	1.25457	4.96925	1.21006e-18	1.91451e-17
CTDSP2	ENSG00000175215	1.25787	1.37715	0.000130171	0.000461629
SIRPA	ENSG00000198053	1.25793	1.72926	1.84187e-05	7.69797e-05
OPN3	ENSG00000054277	1.25863	3.50588	3.45127e-11	3.02322e-10
RHOXF1-AS1	ENSG00000258545	1.2637	3.82293	2.80661e-11	2.48447e-10
KMT2E	ENSG00000005483	1.26389	5.56209	2.72411e-19	4.47103e-18
RP11-54F2.1	ENSG00000251196	1.2648	6.52269	3.05246e-20	5.38354e-19
TPTE2P1	ENSG00000253771	1.2653	1.60709	4.51865e-05	0.000176237
CTB-35F21.4	ENSG00000250692	1.26633	4.85894	4.56081e-19	7.43266e-18
SKP1	ENSG00000113558	1.26637	2.12095	3.23053e-05	0.000128608
ARRDC3-AS1	ENSG00000281357	1.26672	6.20027	1.19968e-24	2.74586e-23
RP11-46A10.6	ENSG00000251520	1.26921	1.51539	0.00245904	0.00650852
GRIK1	ENSG00000171189	1.27124	3.87933	4.26763e-13	4.54033e-12
PTOV1-AS1	ENSG00000268006	1.27204	7.78643	1.2493e-43	6.00185e-42
GNRHR	ENSG00000109163	1.27229	2.733	1.16522e-06	5.84764e-06
TMEM51	ENSG00000171729	1.27287	1.86897	4.15627e-06	1.91783e-05
FRMD6-AS2	ENSG00000258537	1.27382	1.73248	0.000608913	0.00186599
CCDC146	ENSG00000135205	1.27383	7.15738	6.53007e-33	2.21446e-31
TMEM206	ENSG00000065600	1.27423	1.58112	0.000120216	0.000428966
DOK3	ENSG00000146094	1.28303	1.41335	0.000833332	0.00247609
ACBD4	ENSG00000181513	1.28746	2.28028	5.1676e-05	0.000198608
QPCTL	ENSG00000011478	1.28777	1.81189	0.000242524	0.00081406
ERI1	ENSG00000104626	1.28815	2.35794	3.62708e-06	1.68376e-05
HOXB-AS4	ENSG00000242207	1.28897	6.50686	8.60765e-34	3.0189e-32
PDE4DIP	ENSG00000178104	1.29108	3.04687	3.48858e-10	2.76449e-09
RAD51B	ENSG00000182185	1.29142	3.59555	8.63054e-08	5.16936e-07
STARD4-AS1	ENSG00000246859	1.29522	7.68431	4.93218e-50	2.79107e-48
SRGAP2B	ENSG00000196369	1.29664	1.43848	6.88692e-05	0.000257812
B4GALT2	ENSG00000117411	1.29672	1.40184	5.35154e-05	0.000205335
THRB	ENSG00000151090	1.29719	1.90723	1.93684e-05	8.05825e-05
ARNTL2-AS1	ENSG00000245311	1.30127	8.53526	1.03981e-34	3.791e-33
CTD-2377D24.6	ENSG00000244649	1.302	2.3485	4.23111e-07	2.29036e-06
GOT1	ENSG00000120053	1.30247	1.32917	0.0026589	0.00697348
CUL4B	ENSG00000158290	1.30403	2.81359	6.95906e-06	3.11151e-05
RP11-500M8.7	ENSG00000272921	1.30616	3.15008	2.65861e-08	1.72092e-07
CDC42EP5	ENSG00000167617	1.30642	1.30602	0.000120651	0.000430351
RP11-211N11.5	ENSG00000234393	1.3102	2.82132	2.54258e-08	1.65277e-07
C1orf147	ENSG00000162888	1.31231	6.51235	9.02417e-27	2.28052e-25
MIA3	ENSG00000154305	1.31565	6.66219	8.76774e-22	1.67788e-20
MAGI3	ENSG00000081026	1.31875	3.80431	2.05019e-13	2.23534e-12
FAM222A-AS1	ENSG00000255650	1.32097	5.18223	3.54567e-18	5.47826e-17
TDRP	ENSG00000180190	1.32246	1.91091	0.000450922	0.00142784
AC012668.2	ENSG00000237525	1.326	2.07341	0.000155329	0.000543327
GPR39	ENSG00000183840	1.32641	6.95183	1.14683e-32	3.84666e-31
HEATR1	ENSG00000119285	1.32721	7.85642	3.21078e-49	1.79493e-47
FHOD1	ENSG00000135723	1.32758	3.98993	6.35551e-14	7.27335e-13
SLC1A1	ENSG00000106688	1.3294	4.72868	1.39291e-15	1.81986e-14
RP11-495P10.10	ENSG00000225871	1.3296	3.18016	2.06523e-10	1.66956e-09
RP11-154H23.4	ENSG00000277855	1.3298	1.3828	0.000494818	0.00155192
CXCR6	ENSG00000172215	1.33009	1.28179	6.27042e-05	0.000236997
XBP1	ENSG00000100219	1.33034	2.00269	5.43117e-05	0.000207872
SLC17A5	ENSG00000119899	1.33376	2.2388	1.18541e-05	5.13343e-05
RAPGEF3	ENSG00000079337	1.33621	3.76006	5.79991e-14	6.67895e-13
EPHX1	ENSG00000143819	1.33961	6.57429	1.4661e-39	6.20335e-38
CHRNB4	ENSG00000117971	1.34009	1.73479	6.61236e-05	0.000248644
CTB-111H14.1	ENSG00000243797	1.34161	2.89741	9.92424e-08	5.91e-07
XXbac-BPG299F13.14	ENSG00000271821	1.34407	3.33794	4.64955e-09	3.27886e-08
SPACA9	ENSG00000165698	1.34744	1.30112	0.000367827	0.00118611
PTPN1	ENSG00000196396	1.35632	2.10909	6.99364e-06	3.12394e-05
PCOLCE2	ENSG00000163710	1.35718	1.97702	8.08515e-06	3.59063e-05
RP11-422P24.11	ENSG00000272654	1.36048	2.98337	9.48826e-08	5.66471e-07
C12orf40	ENSG00000180116	1.36304	7.115	5.04977e-23	1.01701e-21
CPB2	ENSG00000080618	1.36351	3.09944	1.78205e-09	1.31501e-08
RRBP1	ENSG00000125844	1.37156	8.77798	6.61046e-27	1.68906e-25
KATNAL2	ENSG00000167216	1.37182	5.20102	5.85765e-20	1.01562e-18
CCDC110	ENSG00000168491	1.37369	1.54038	7.93489e-06	3.529e-05
NREP	ENSG00000134986	1.37651	3.39398	5.55848e-11	4.78725e-10
PLAUR	ENSG00000011422	1.38256	1.99253	7.66866e-07	3.97838e-06
SUPT16HP1	ENSG00000256238	1.38453	2.17313	4.03486e-06	1.86367e-05
STXBP5L	ENSG00000145087	1.38459	4.85322	1.59052e-17	2.3436e-16
CD96	ENSG00000153283	1.38527	5.10246	1.05726e-18	1.6814e-17
SLC9C1	ENSG00000172139	1.38691	5.44242	9.14056e-24	1.93154e-22
ORC1	ENSG00000085840	1.38783	1.69925	2.787e-06	1.32103e-05
SCMH1	ENSG00000010803	1.38824	7.29821	1.9031e-44	9.38728e-43
RP11-302M6.4	ENSG00000271949	1.39029	3.14763	9.19904e-09	6.25291e-08
BACH1	ENSG00000156273	1.39053	3.15199	2.48055e-10	2e-09
RP11-964E11.3	ENSG00000283098	1.39102	2.38906	1.55684e-07	9.05441e-07
IFITM2	ENSG00000185201	1.39114	5.43333	8.30613e-27	2.11646e-25
RP11-775B15.2	ENSG00000253398	1.39185	5.30785	4.3113e-18	6.61688e-17
LHFPL2	ENSG00000145685	1.39205	4.17547	1.12266e-14	1.36434e-13
ARHGEF26	ENSG00000114790	1.39481	3.25348	2.05634e-05	8.49046e-05
TNS1	ENSG00000079308	1.3969	3.60467	9.81479e-11	8.21521e-10
RP11-44I10.3	ENSG00000261267	1.39897	7.99349	1.69071e-47	9.0669e-46
RP11-470M17.2	ENSG00000254143	1.40657	7.05351	5.58299e-37	2.11055e-35
BCAR3	ENSG00000137936	1.40791	5.46909	1.80858e-20	3.25828e-19
RP11-156K23.3	ENSG00000275202	1.40793	3.49239	2.93366e-14	3.48264e-13
EPB42	ENSG00000166947	1.4084	8.57297	4.75644e-55	3.02575e-53
SMG7	ENSG00000116698	1.41667	5.61903	1.50544e-24	3.37957e-23
WBP4	ENSG00000120688	1.42207	2.15445	0.00136205	0.0038536
CFLAR-AS1	ENSG00000226312	1.42284	7.00111	1.88833e-43	9.02484e-42
AP1G2	ENSG00000213983	1.42672	8.33674	4.045e-40	1.74351e-38
EXOC3L1	ENSG00000179044	1.42712	2.60692	2.43355e-09	1.76193e-08
WDR55	ENSG00000120314	1.43055	6.54971	6.73038e-39	2.79678e-37
SLC35F4	ENSG00000151812	1.4391	2.021	9.03575e-07	4.62518e-06
POLDIP3	ENSG00000100227	1.44467	1.71623	8.06861e-05	0.000297224
RP11-29H23.7	ENSG00000271267	1.44566	2.57389	6.21e-08	3.79596e-07
RP11-353N4.5	ENSG00000234232	1.44666	1.7548	8.82037e-06	3.89092e-05
HPN-AS1	ENSG00000227392	1.45252	2.27925	1.11118e-07	6.57441e-07
PTPRS	ENSG00000105426	1.45345	1.95595	1.0394e-07	6.16553e-07
MAPKAPK5	ENSG00000089022	1.45376	2.62983	7.80163e-06	3.47141e-05
KIAA1755	ENSG00000149633	1.45498	6.85172	5.05547e-44	2.48041e-42
C6orf106	ENSG00000196821	1.45749	1.92999	8.32836e-07	4.28927e-06
PSD	ENSG00000059915	1.45831	3.33358	1.06181e-12	1.09432e-11
LANCL2	ENSG00000132434	1.45969	1.83329	6.17413e-07	3.24873e-06
PSME2	ENSG00000100911	1.46033	2.40092	6.37929e-06	2.8606e-05
ALG6	ENSG00000088035	1.4633	1.37612	0.000171267	0.000592338
RP11-823E8.3	ENSG00000274021	1.46331	2.75134	1.66766e-07	9.6563e-07
ASH1L	ENSG00000116539	1.46384	3.63065	1.38037e-15	1.80604e-14
RP11-115C10.1	ENSG00000254607	1.46627	2.56531	2.54664e-06	1.21522e-05
PDIA6	ENSG00000143870	1.46692	2.56814	2.15517e-06	1.0408e-05
PSMA4	ENSG00000041357	1.46751	1.99903	2.61818e-07	1.469e-06
EHD4-AS1	ENSG00000259883	1.47225	1.61192	2.313e-06	1.10945e-05
WI2-1896O14.1	ENSG00000215861	1.48606	5.28814	6.51986e-30	1.88524e-28
ERP44	ENSG00000023318	1.48912	5.27016	3.20264e-23	6.55014e-22
SERPINE1	ENSG00000106366	1.48943	3.66197	6.20551e-10	4.77793e-09
GJB7	ENSG00000164411	1.4906	2.81185	1.02649e-11	9.47781e-11
TMEFF2	ENSG00000144339	1.49168	4.9227	1.67729e-23	3.4767e-22
EPHB1	ENSG00000154928	1.4944	1.51869	1.92156e-06	9.34342e-06
TMEM123	ENSG00000152558	1.49848	6.27308	4.67503e-24	1.01465e-22
NECTIN4	ENSG00000143217	1.50113	2.56046	9.59427e-11	8.05988e-10
LINC01135	ENSG00000234807	1.50195	3.28973	9.1978e-10	7e-09
ANKRD28	ENSG00000206560	1.5047	3.02937	1.41336e-09	1.04714e-08
CELSR3	ENSG00000008300	1.50621	1.90345	1.122e-06	5.64938e-06
ZC3H12A	ENSG00000163874	1.5066	2.06877	4.99146e-08	3.09908e-07
H2AFY2	ENSG00000099284	1.50678	5.5825	1.06825e-25	2.56602e-24
GTF2I	ENSG00000263001	1.51853	5.00318	9.69545e-29	2.68561e-27
LDHAL6B	ENSG00000171989	1.5236	3.06332	2.80851e-12	2.74134e-11
DNAJC7	ENSG00000168259	1.53094	6.13381	1.86492e-38	7.5118e-37
NSG1	ENSG00000168824	1.53455	1.48211	9.90614e-07	5.04273e-06
SLC12A4	ENSG00000124067	1.53522	2.35387	8.46028e-06	3.73744e-05
CCT8	ENSG00000156261	1.53771	1.75602	4.90792e-07	2.62135e-06
CYB561	ENSG00000008283	1.54009	2.49348	1.46076e-10	1.19769e-09
FKBP7	ENSG00000079150	1.54548	2.81087	3.87188e-07	2.117e-06
WDR74	ENSG00000133316	1.54867	1.89354	2.26376e-06	1.08812e-05
AK5	ENSG00000154027	1.55129	2.00833	4.175e-07	2.26664e-06
MIR3190	ENSG00000265134	1.55156	2.44646	7.28e-07	3.78742e-06
PVT1	ENSG00000249859	1.55605	2.75758	1.48067e-08	9.83981e-08
ERAP2	ENSG00000164308	1.55615	2.14119	2.33307e-07	1.326e-06
CTD-2521M24.6	ENSG00000269481	1.55916	5.2498	5.18971e-32	1.70355e-30
SLC16A11	ENSG00000174326	1.56138	1.64497	3.28265e-05	0.000130626
ELF2	ENSG00000109381	1.56223	6.9873	4.01536e-42	1.85188e-40
ATG5	ENSG00000057663	1.56365	5.93867	2.33838e-39	9.84896e-38
CTIF	ENSG00000134030	1.56477	3.66219	4.66364e-10	3.6363e-09
ADAMTS9-AS2	ENSG00000241684	1.56485	3.12424	5.87854e-13	6.14781e-12
SPON1	ENSG00000262655	1.56723	3.97551	1.38363e-14	1.67269e-13
GTF2IRD1	ENSG00000006704	1.5708	2.03913	6.78221e-08	4.11093e-07
RP11-277P12.20	ENSG00000245648	1.57119	1.98029	0.000124571	0.000443474
C1QTNF1-AS1	ENSG00000265096	1.57227	5.25386	1.5776e-18	2.47059e-17
VSIG10	ENSG00000176834	1.57554	3.70128	1.74546e-16	2.42107e-15
VDAC1	ENSG00000213585	1.57672	1.70008	9.76882e-06	4.28836e-05
SEPT4-AS1	ENSG00000264672	1.57871	5.397	6.7312e-39	2.79678e-37
ABLIM2	ENSG00000163995	1.58529	5.67137	6.66002e-32	2.1631e-30
ZNF511-PRAP1	ENSG00000283496	1.59055	4.83842	9.41592e-28	2.49978e-26
ZNF451	ENSG00000112200	1.59283	1.69386	1.32782e-06	6.62046e-06
TANGO6	ENSG00000103047	1.59388	1.404	0.000165447	0.000573717
PRTFDC1	ENSG00000099256	1.59721	1.5924	9.70234e-07	4.94991e-06
RP1-28O10.1	ENSG00000227591	1.59768	2.73376	6.89249e-11	5.87582e-10
DNAH17-AS1	ENSG00000267432	1.59839	1.8	2.91283e-07	1.6205e-06
TGM2	ENSG00000198959	1.59868	3.77894	3.35569e-11	2.94229e-10
CTB-129P6.4	ENSG00000267282	1.6006	9.58297	2.06413e-50	1.18997e-48
FAM230B	ENSG00000215498	1.60157	3.56926	3.3512e-11	2.94115e-10
RP11-680F20.9	ENSG00000255027	1.60288	1.56384	4.43896e-07	2.39725e-06
DENND2D	ENSG00000162777	1.60473	1.55016	2.67726e-05	0.000108502
LIG1	ENSG00000105486	1.60596	3.20409	7.39931e-12	6.94316e-11
CDH4	ENSG00000179242	1.60735	3.61971	1.57579e-18	2.47059e-17
POLH	ENSG00000170734	1.60779	4.70847	1.3424e-22	2.65714e-21
TUBD1	ENSG00000108423	1.6182	2.07684	2.01374e-05	8.33322e-05
ANGPT4	ENSG00000101280	1.61881	2.36369	2.20898e-09	1.60945e-08
PAXIP1	ENSG00000157212	1.61982	6.74169	2.54495e-43	1.20383e-41
HMOX2	ENSG00000103415	1.62306	1.46148	1.57595e-05	6.68042e-05
PHC3	ENSG00000173889	1.62315	2.48398	1.30717e-10	1.08289e-09
AC019048.1	ENSG00000223884	1.62669	2.62793	2.10718e-08	1.38241e-07
MUC12	ENSG00000205277	1.62911	4.3702	1.14914e-15	1.52076e-14
AC006262.5	ENSG00000268621	1.63026	4.20134	2.44732e-22	4.81323e-21
CTD-2267D19.3	ENSG00000266208	1.63082	4.55579	2.69598e-27	7.04468e-26
CTD-3064C13.1	ENSG00000255372	1.63991	4.36884	2.09308e-24	4.65219e-23
SEC16A	ENSG00000148396	1.64322	2.60299	5.21883e-10	4e-09
GRIN2B	ENSG00000273079	1.64477	3.21343	8.99521e-15	1.10042e-13
GMPR2	ENSG00000100938	1.64579	5.8141	7.27603e-34	2.58131e-32
ATP5H	ENSG00000167863	1.65167	2.18833	1.55322e-08	1.03e-07
SDCBP2	ENSG00000125775	1.66604	1.71595	2.40278e-06	1.14836e-05
IFITM3	ENSG00000142089	1.66711	4.61031	5.54199e-22	1.07394e-20
VPS16	ENSG00000215305	1.67032	2.34623	5.95223e-07	3.14453e-06
SLC8A1-AS1	ENSG00000227028	1.67108	5.42745	5.31686e-40	2.28106e-38
MIR4435-2HG	ENSG00000172965	1.67821	3.29466	1.33036e-10	1.10056e-09
RP4-734G22.3	ENSG00000272078	1.67923	3.59539	2.27598e-17	3.30088e-16
CDSN	ENSG00000204539	1.6795	4.70446	5.75629e-29	1.60897e-27
RP11-572M11.4	ENSG00000240057	1.68723	3.0356	1.15667e-14	1.40383e-13
RNGTT	ENSG00000111880	1.68998	5.79864	2.96001e-18	4.61201e-17
RP11-627G18.1	ENSG00000266283	1.69249	3.84705	4.51033e-15	5.67576e-14
RP11-58K22.5	ENSG00000254693	1.69672	2.445	1.07231e-09	8e-09
CTD-2201E18.3	ENSG00000177738	1.69924	8.81776	1.57045e-76	1.36659e-74
MAP3K3	ENSG00000198909	1.70012	1.76729	4.01489e-08	2.53306e-07
ATP9B	ENSG00000166377	1.70232	3.12763	4.61712e-10	3.60308e-09
CDKN2C	ENSG00000123080	1.70656	2.45471	7.09757e-12	6.67359e-11
SIPA1	ENSG00000213445	1.7097	2.02351	5.4405e-10	4.21e-09
NIPA1	ENSG00000170113	1.70994	2.36609	2.81148e-08	1.81e-07
ABCA9-AS1	ENSG00000231749	1.71042	2.46204	3.60657e-09	2.57087e-08
RP11-793J2.1	ENSG00000283667	1.72537	1.74002	6.13657e-09	4.23998e-08
HSD3BP5	ENSG00000198857	1.72538	3.26331	7.25464e-17	1.03108e-15
TBPL1	ENSG00000028839	1.72897	5.32474	6.6841e-34	2.38969e-32
CTD-2600O9.1	ENSG00000187185	1.7327	5.19322	3.44783e-37	1.30875e-35
NFIB	ENSG00000147862	1.7335	4.32042	1.14333e-23	2.39139e-22
TNRC6C	ENSG00000078687	1.73969	2.17661	3.62679e-08	2.30873e-07
LPIN2	ENSG00000101577	1.75258	2.79867	2.50265e-11	2.22393e-10
PRKRA	ENSG00000180228	1.75472	8.36623	1.91269e-56	1.23375e-54
AC013444.1	ENSG00000229781	1.77339	2.72532	4.69486e-14	5.47476e-13
RP11-50D16.4	ENSG00000273507	1.77967	2.08522	2.11507e-08	1.38659e-07
MTUS1	ENSG00000129422	1.7824	3.42856	2.16781e-15	2.78882e-14
RP4-791M13.4	ENSG00000255148	1.78545	1.92931	5.06326e-10	3.92796e-09
NUP50-AS1	ENSG00000226328	1.78872	3.47068	5.35859e-13	5.63599e-12
CRTAC1	ENSG00000095713	1.79007	6.05171	5.27476e-43	2.45729e-41
RUSC1	ENSG00000160753	1.7911	3.73025	1.36745e-16	1.90823e-15
CFAP43	ENSG00000197748	1.79989	3.76191	1.08343e-11	9.9836e-11
RASSF3	ENSG00000153179	1.80293	1.66755	2.00614e-07	1.15007e-06
RP11-626G3.1	ENSG00000280182	1.80772	4.41253	1.35475e-26	3.39571e-25
RP11-47A8.5	ENSG00000272933	1.8142	1.83006	6.12795e-10	4.72216e-09
TTC39A	ENSG00000085831	1.82079	2.18232	1.94928e-10	1.57859e-09
OSGIN2	ENSG00000164823	1.82223	2.91728	2.41659e-13	2.61627e-12
SPRED2	ENSG00000198369	1.82223	5.99063	5.77516e-47	3.00961e-45
IL16	ENSG00000172349	1.82687	4.71216	2.78042e-30	8.19379e-29
GTF2IP1	ENSG00000277053	1.8272	1.86708	1.32582e-09	9.85442e-09
RP11-1018N14.1	ENSG00000249383	1.82746	2.24204	1.75589e-07	1.01354e-06
CHN2	ENSG00000106069	1.8278	4.55508	7.01935e-34	2.49987e-32
HPS3	ENSG00000163755	1.82784	8.17196	1.8636e-33	6.41412e-32
NUTM2A-AS1	ENSG00000223482	1.82938	4.43867	3.11249e-27	8.08722e-26
BAZ2A	ENSG00000076108	1.83804	4.31353	1.69765e-23	3.51101e-22
RP11-298A10.1	ENSG00000283528	1.84727	2.27551	8.15455e-12	7.60542e-11
GOLGA7B	ENSG00000155265	1.84745	2.12203	5.75154e-09	3.98889e-08
RP11-23D24.2	ENSG00000238755	1.85605	3.24067	8.67429e-15	1.06399e-13
RP11-867G2.8	ENSG00000255929	1.86658	5.89567	7.06591e-53	4.25986e-51
IMPDH1P10	ENSG00000232133	1.86886	6.68372	4.46283e-49	2.47983e-47
RP11-197K3.1	ENSG00000242290	1.88351	3.73094	2.3786e-20	4.23556e-19
NECTIN2	ENSG00000130202	1.88557	2.53702	1.65858e-12	1.6643e-11
PISD	ENSG00000241878	1.88659	2.26676	9.07847e-11	7.65446e-10
RP11-426L16.3	ENSG00000225075	1.88779	8.15003	3.04532e-61	2.11203e-59
CAST	ENSG00000153113	1.9041	8.80257	8.37794e-115	1.28797e-112
GTF2IP4	ENSG00000233369	1.90511	2.07977	4.83292e-09	3.39015e-08
ARMC10	ENSG00000170632	1.90793	2.55807	1.08875e-09	8.16478e-09
TG	ENSG00000042832	1.90932	3.1224	4.43788e-17	6.33668e-16
EHD3	ENSG00000013016	1.91063	1.85034	5.6635e-09	3.93671e-08
ITGA6	ENSG00000091409	1.91985	4.55785	7.41421e-32	2.39121e-30
FDPS	ENSG00000160752	1.92238	6.31011	6.99252e-75	5.86355e-73
LTB	ENSG00000227507	1.92541	2.67428	6.03687e-14	6.9345e-13
BNIP3P11	ENSG00000271550	1.92828	7.23683	2.14028e-58	1.42028e-56
RSRC1	ENSG00000174891	1.9309	3.2462	8.01201e-20	1.37111e-18
RFESD	ENSG00000175449	1.93263	1.9212	6.34218e-10	4.87502e-09
MFN1	ENSG00000171109	1.9355	2.83249	1.72905e-17	2.53961e-16
SMG6	ENSG00000070366	1.94077	2.08124	4.32318e-10	3.3909e-09
C1orf100	ENSG00000173728	1.94351	2.03845	2.18215e-12	2.15045e-11
C17orf80	ENSG00000141219	1.94726	2.13738	1.18764e-10	1e-09
TRADD	ENSG00000102871	1.95593	2.9845	1.19851e-15	1.58156e-14
HERC6	ENSG00000138642	1.9779	4.79676	4.38171e-30	1.28308e-28
FHAD1	ENSG00000142621	1.9822	3.45805	3.5679e-20	6.24485e-19
PDE10A	ENSG00000112541	1.99398	3.46824	7.36148e-23	1.47935e-21
TLK1	ENSG00000198586	1.99984	2.14967	1.3692e-07	8.00855e-07
NMNAT2	ENSG00000157064	2.00691	4.39739	5.27494e-13	5.55434e-12
TMEM39A	ENSG00000176142	2.01347	2.88952	1.08944e-15	1.44382e-14
APBA2	ENSG00000034053	2.01665	2.16475	1.40191e-10	1.15251e-09
RCN1	ENSG00000049449	2.01997	2.91702	1.04507e-15	1.38702e-14
SMIM8	ENSG00000111850	2.03907	3.62431	1.14944e-25	2.75389e-24
ZKSCAN4	ENSG00000187626	2.04556	2.20367	5.47644e-11	4.72202e-10
SRSF12	ENSG00000154548	2.04793	2.40613	5.95817e-11	5.11715e-10
CTD-2260A17.1	ENSG00000248734	2.04826	6.84145	3.0388e-100	3.78782e-98
RP11-64D24.4	ENSG00000256195	2.05763	2.30096	2.08245e-12	2.05879e-11
RASSF4	ENSG00000107551	2.067	2.94883	5.0065e-20	8.71319e-19
EMC9	ENSG00000100908	2.07731	4.9444	3.96914e-43	1.86793e-41
A1CF	ENSG00000148584	2.0839	2.57152	1.07503e-17	1.60714e-16
HCG4P5	ENSG00000227766	2.08664	7.07632	7.58654e-21	1.39122e-19
RP5-1063M23.3	ENSG00000250770	2.09338	3.12433	2.02914e-17	2.9662e-16
AC113189.5	ENSG00000233223	2.09585	6.75476	5.00322e-56	3.20484e-54
TAOK1	ENSG00000160551	2.09799	3.38037	2.324e-17	3.36523e-16
SNF8	ENSG00000159210	2.10849	7.26942	3.48487e-87	3.49396e-85
HPS4	ENSG00000100099	2.11175	4.0939	2.64245e-26	6.55215e-25
TRIM31-AS1	ENSG00000231226	2.12609	5.58519	1.68341e-45	8.57888e-44
PSORS1C2	ENSG00000204538	2.13003	4.7861	4.21869e-47	2.22361e-45
NUMB	ENSG00000133961	2.16128	5.31079	2.38253e-30	7.0664e-29
ANKRD30B	ENSG00000180777	2.16382	2.6578	9.23551e-16	1.23105e-14
INHBA-AS1	ENSG00000224116	2.17716	2.38303	3.96252e-14	4.65609e-13
LINC00854	ENSG00000236383	2.17764	6.82518	2.45037e-98	2.97398e-96
RP11-290C10.1	ENSG00000255882	2.18297	2.5641	5.5838e-15	6.95074e-14
LDLRAD4	ENSG00000168675	2.19071	2.24111	5.77695e-12	5.48216e-11
JADE1	ENSG00000077684	2.19362	4.04107	1.07344e-23	2.25545e-22
L34079.2	ENSG00000268361	2.21075	2.51395	3.09454e-17	4.45305e-16
TAF12	ENSG00000120656	2.21505	3.4735	1.93789e-20	3.48442e-19
ITPR1	ENSG00000150995	2.22623	6.07834	3.38494e-39	1.41921e-37
CHST11	ENSG00000171310	2.2343	4.12136	1.06149e-29	3.03134e-28
CTD-2369P2.5	ENSG00000266978	2.23453	7.90332	2.6085e-51	1.54236e-49
HEPHL1	ENSG00000181333	2.24224	3.19886	1.3172e-20	2.39641e-19
C1QTNF1	ENSG00000173918	2.26264	2.70282	1.08311e-16	1.52064e-15
WDR86	ENSG00000187260	2.26268	8.5011	1.36567e-105	1.85249e-103
LINC00152	ENSG00000222041	2.27862	5.05021	4.08251e-47	2.1642e-45
TBC1D16	ENSG00000167291	2.31325	2.00205	1.23076e-11	1.12848e-10
ERI3	ENSG00000117419	2.32452	3.00781	1.21152e-15	1.59643e-14
SH3PXD2A	ENSG00000107957	2.3357	3.0895	2.48806e-27	6.51985e-26
CTD-2047H16.5	ENSG00000276863	2.35308	7.46172	7.60259e-85	7.46025e-83
CCDC181	ENSG00000117477	2.36431	4.60632	7.30864e-54	4.52449e-52
CACNG8	ENSG00000142408	2.38087	4.82601	8.64508e-48	4.66329e-46
HSPB9	ENSG00000260325	2.42487	2.06269	2.11277e-17	3.07385e-16
RALGPS2	ENSG00000116191	2.44125	4.47778	2.81705e-53	1.70951e-51
SMYD2	ENSG00000143499	2.44434	2.56607	5.14276e-16	6.95555e-15
HBG2	ENSG00000196565	2.45426	8.07524	9.84111e-171	2.32755e-168
RMDN2	ENSG00000115841	2.48748	4.75183	2.35314e-34	8.54541e-33
GYS2	ENSG00000111713	2.4917	3.07461	2.16596e-15	2.78882e-14
GRIP1	ENSG00000155974	2.51292	3.76077	8.17682e-32	2.60979e-30
RP11-54O7.11	ENSG00000224969	2.51927	3.68415	7.66621e-30	2.20978e-28
AC007899.3	ENSG00000224891	2.52989	5.8401	3.49166e-76	3.01001e-74
RP11-670E13.5	ENSG00000262112	2.54068	10.0394	8.66308e-209	2.49713e-206
CTD-2047H16.4	ENSG00000263069	2.54662	13.3182	1.61113e-181	4.0165e-179
RP11-618G20.1	ENSG00000258964	2.57206	2.856	1.01846e-18	1.62531e-17
PLA2G4C-AS1	ENSG00000269420	2.57721	3.90919	6.26447e-32	2.04182e-30
RP11-23P13.6	ENSG00000174171	2.59232	5.46158	7.5248e-71	5.93237e-69
RP11-54O7.10	ENSG00000231702	2.60568	2.68177	3.28078e-20	5.75321e-19
RHOC	ENSG00000155366	2.62969	6.72788	3.24177e-96	3.8336e-94
SAMD4A	ENSG00000020577	2.63897	2.90838	1.04422e-19	1.78039e-18
DTX3L	ENSG00000163840	2.64736	3.32322	5.86929e-30	1.70246e-28
AK8	ENSG00000165695	2.65722	2.97124	2.02283e-24	4.52878e-23
NCOA7	ENSG00000111912	2.67524	3.01867	2.8928e-25	6.78962e-24
SUN2	ENSG00000100242	2.68366	8.54839	1.47762e-174	3.58672e-172
GBP7	ENSG00000213512	2.70228	3.70067	2.72466e-40	1.18549e-38
CTD-2260A17.2	ENSG00000247121	2.70498	7.82627	5.89727e-167	1.32674e-164
HCG4P7	ENSG00000230521	2.72146	3.14814	1.8488e-12	1.8456e-11
TTC33	ENSG00000113638	2.7468	5.85011	4.50374e-87	4.46693e-85
MCPH1	ENSG00000147316	2.76948	3.83118	2.08399e-41	9.4229e-40
RP11-356I2.4	ENSG00000237499	2.80234	3.96676	2.97202e-37	1.13281e-35
PHRF1	ENSG00000070047	2.81738	4.11656	1.54323e-54	9.74983e-53
DIAPH2	ENSG00000147202	2.85935	3.26232	2.79064e-37	1.06809e-35
LINC00954	ENSG00000228784	2.86564	2.62564	2.43771e-25	5.73608e-24
CTA-384D8.36	ENSG00000272821	2.89557	6.62822	4.60145e-69	3.479e-67
TMCC2	ENSG00000133069	2.91123	2.51723	1.4491e-24	3.2681e-23
RP11-473M20.9	ENSG00000262370	2.93179	2.7847	1.50586e-24	3.37957e-23
PTPRN2	ENSG00000155093	2.9364	5.48946	2.09584e-78	1.93321e-76
RP3-436N22.3	ENSG00000238272	2.94555	2.46898	7.18514e-28	1.92662e-26
GNG12	ENSG00000172380	2.96049	2.99601	1.9334e-28	5.32347e-27
NAV2	ENSG00000166833	2.98943	3.07995	8.38053e-27	2.12606e-25
TRAPPC3L	ENSG00000173626	2.99441	4.39128	7.29093e-60	4.94497e-58
RP11-536G4.1	ENSG00000258292	3.04403	3.88141	8.70731e-37	3.27821e-35
U91328.21	ENSG00000272558	3.07107	8.31539	2.19734e-254	8.10731e-252
EIF2D	ENSG00000143486	3.14144	6.10538	3.78325e-103	4.84677e-101
EPB41L5	ENSG00000115109	3.14449	2.71373	7.47393e-32	2.40208e-30
SGMS1	ENSG00000198964	3.15391	3.02823	8.3899e-27	2.12606e-25
RP11-495P10.1	ENSG00000231551	3.16422	7.06392	7.60115e-153	1.5242e-150
DOK1	ENSG00000115325	3.18178	2.49716	1.71206e-25	4.08063e-24
RP11-519G16.5	ENSG00000259342	3.19144	8.00017	2.62903e-220	8.08338e-218
PRSS23	ENSG00000150687	3.21587	7.58995	7.29818e-127	1.27016e-124
JADE2	ENSG00000043143	3.22565	3.91247	3.31493e-50	1.89918e-48
PARP9	ENSG00000138496	3.32636	5.74616	2.13319e-104	2.81093e-102
RP11-148B18.1	ENSG00000226835	3.34136	3.52565	5.72522e-45	2.87008e-43
LIPE-AS1	ENSG00000213904	3.34245	9.29072	4.25427e-298	1.7837e-295
RDH12	ENSG00000139988	3.3639	2.98303	8.27288e-35	3.02814e-33
RP11-638I2.8	ENSG00000258666	3.37177	11.4972	2.03106e-196	5.51014e-194
PARD3	ENSG00000148498	3.3808	4.38669	2.63472e-63	1.89865e-61
LINC01378	ENSG00000236922	3.40611	6.40132	5.34867e-157	1.09636e-154
SLC30A4	ENSG00000104154	3.42865	4.97595	3.06748e-93	3.36838e-91
XXbac-BPG248L24.12	ENSG00000271581	3.47468	4.96724	3.10462e-19	5.0685e-18
PANDAR	ENSG00000281450	3.48014	6.27316	4.65336e-120	7.80411e-118
DDX27	ENSG00000124228	3.48154	4.66568	1.56373e-77	1.41411e-75
CTD-2240E14.4	ENSG00000267387	3.48619	6.61228	4.8608e-115	7.59933e-113
TMEM52B	ENSG00000165685	3.53125	3.71453	2.68101e-41	1.19467e-39
RP11-439L18.2	ENSG00000224460	3.53463	4.20436	4.12283e-57	2.6781e-55
AC006160.5	ENSG00000249502	3.57125	10.0049	4.92287009516218e-320	2.52269721140282e-317
NANS	ENSG00000095380	3.57965	7.13699	1.85165e-193	4.87988e-191
TAF15	ENSG00000270647	3.59068	8.26506	8.7551e-124	1.4955e-121
ANGPTL6	ENSG00000130812	3.61806	8.45789	1.97626258336499e-323	1.0721224514755e-320
AC010149.4	ENSG00000235419	3.65897	9.81686	0	0
VEPH1	ENSG00000197415	3.72274	5.06268	5.52395e-104	7.17646e-102
DXO	ENSG00000204348	3.77033	7.35676	3.14446e-197	8.78924e-195
VAMP1	ENSG00000139190	3.77326	4.933	7.45083e-113	1.10849e-110
NIM1K	ENSG00000177453	3.79623	3.58399	4.30896e-47	2.25829e-45
SP140	ENSG00000079263	3.81744	8.23246	0	0
TAP1	ENSG00000168394	3.83359	5.42248	2.40743e-108	3.41633e-106
SERPINE2	ENSG00000135919	3.86344	3.30078	1.81969e-45	9.22243e-44
GLS	ENSG00000115419	3.86639	8.13763	2.21216e-275	8.87174e-273
TLDC2	ENSG00000101342	3.88954	9.36223	2.02982e-300	8.91572e-298
AC116366.6	ENSG00000234290	3.89329	6.00569	1.00579e-159	2.1085e-157
RP11-525K10.1	ENSG00000260706	3.94982	3.07828	8.17432e-38	3.20851e-36
AC073072.5	ENSG00000179428	3.95557	6.7934	2.79677e-183	7.16595e-181
ARHGEF33	ENSG00000214694	3.96255	3.91862	8.77138e-51	5.0885e-49
CAMK4	ENSG00000152495	3.97638	3.78123	2.50646e-61	1.75149e-59
KATNB1	ENSG00000140854	4.00256	3.92356	1.1908e-69	9.07764e-68
TUBA8	ENSG00000183785	4.09439	4.30173	5.00282e-89	5.18495e-87
RP11-322D14.2	ENSG00000260145	4.13243	6.69666	9.16904e-225	2.91639e-222
AC020594.5	ENSG00000237133	4.17848	6.55228	5.15253e-217	1.53313e-214
CTD-3088G3.8	ENSG00000188897	4.19809	4.3688	1.23772e-76	1.09776e-74
C7orf49	ENSG00000122783	4.20546	8.19034	3.31603e-250	1.13285e-247
PSMB9	ENSG00000240065	4.27513	10.8358	1.10511262908752e-310	5.09677944535164e-308
AFAP1	ENSG00000196526	4.2834	5.47246	1.96757e-161	4.32115e-159
CTD-2369P2.8	ENSG00000267607	4.31369	7.41065	6.08208e-160	1.30468e-157
TBC1D17	ENSG00000104946	4.32387	5.70394	1.03425e-170	2.38498e-168
RP1-71H24.1	ENSG00000257452	4.33999	13.4056	0	0
FAM228A	ENSG00000186453	4.38437	4.53549	2.30997e-72	1.86905e-70
DHRS12	ENSG00000102796	4.40679	4.3782	1.46875e-58	9.81724e-57
AC013463.2	ENSG00000236283	4.62637	5.69785	3.76414e-95	4.28648e-93
TBXAS1	ENSG00000059377	4.63119	5.79998	1.13831e-108	1.6406e-106
AC009950.2	ENSG00000225963	4.82464	8.87712	0	0
HCG4P11	ENSG00000225864	4.93443	5.058	1.64061e-32	5.46316e-31
RP11-326C3.11	ENSG00000251661	5.14216	8.03806	3.30163e-148	6.47962e-146
HLA-F-AS1	ENSG00000214922	5.54038	6.05103	1.25305e-270	4.81591e-268
CETP	ENSG00000087237	6.13774	6.08539	4.34945e-252	1.54305e-249
TRIM5	ENSG00000132256	6.18281	10.2892	0	0
NELFE	ENSG00000204356	6.2625	7.19	0	0
SMTNL1	ENSG00000214872	6.74923	8.53238	0	0
ACO1	ENSG00000122729	6.80262	10.2847	0	0
LIPA	ENSG00000107798	8.53285	14.3005	0	0
AP001610.5	ENSG00000228318	9.3174	10.4508	0	0
RP11-44K6.3	ENSG00000253939	9.57752	9.0267	0	0
AC015849.2	ENSG00000270240	9.90157	11.7355	0	0
RP11-609D21.3	ENSG00000279296	10.1452	9.89587	0	0

## Sheet: unique_to_KO_ctrl
Genename	Ensembl_ID	logFC	logCPM	PValue	FDR
TRPM3	ENSG00000083067	-3.11015	2.93925	0.00025212	0.00165571
LRP1B	ENSG00000168702	-3.02773	3.67542	0.000338895	0.00213882
THSD7B	ENSG00000144229	-3.00626	2.8823	6.12317e-05	0.000467882
CNTNAP2	ENSG00000174469	-2.84924	4.00849	0.00047828	0.00285997
C10orf11	ENSG00000148655	-2.83601	3.20859	0.000957388	0.00516121
ADGRL3	ENSG00000150471	-2.79392	2.47998	0.00105297	0.00557725
LARGE1	ENSG00000133424	-2.68015	2.77173	0.00148512	0.00743034
SPAG16	ENSG00000144451	-2.64828	3.12488	0.00077345	0.004303
DLG2	ENSG00000150672	-2.62954	3.98353	0.000496551	0.00295134
CACNA2D3	ENSG00000157445	-2.60632	3.44396	0.000104506	0.000752618
SOX2-OT	ENSG00000242808	-2.58126	2.82371	0.00129982	0.00665936
NBEA	ENSG00000172915	-2.56694	2.24602	0.000969661	0.00521241
CADM2	ENSG00000175161	-2.56036	2.84215	0.00040972	0.00250337
NRG3	ENSG00000185737	-2.53051	3.20515	0.000456292	0.00274506
GRID2	ENSG00000152208	-2.41609	3.43906	0.00125612	0.00646016
INPP4B	ENSG00000109452	-2.40448	2.59379	0.00225473	0.0104823
GPHN	ENSG00000171723	-2.3636	2.46915	0.0020609	0.00974026
TRAPPC9	ENSG00000167632	-2.3618	2.57763	0.00234848	0.010859
PTPRD	ENSG00000153707	-2.32839	4.37223	0.000166481	0.00114035
SLIT3	ENSG00000184347	-2.28253	2.6331	0.00618937	0.0243504
ANK3	ENSG00000151150	-2.24787	2.5703	0.0024008	0.0110777
ASIC2	ENSG00000108684	-2.10325	3.1749	0.00279773	0.0126073
DISC1FP1	ENSG00000261645	-2.08586	2.68664	0.00255175	0.0116328
MAGI2	ENSG00000187391	-2.05338	3.52126	0.00765201	0.0291097
TBC1D5	ENSG00000131374	-1.98448	3.57146	0.00104657	0.0055496
NKAIN2	ENSG00000188580	-1.95825	3.22102	0.00353507	0.0153481
SNX29	ENSG00000048471	-1.95093	2.5535	0.0121841	0.0426945
FGF14	ENSG00000102466	-1.9472	2.81953	0.000578813	0.00337132
LSAMP	ENSG00000185565	-1.94226	3.47395	0.00308967	0.0137058
SLC14A2	ENSG00000132874	-1.91911	2.52184	0.00437961	0.0183202
AC074391.1	ENSG00000204929	-1.88858	3.34032	1.23423e-05	0.000110282
WDR70	ENSG00000082068	-1.88366	2.49571	0.000540637	0.00318115
AGAP1	ENSG00000157985	-1.81199	3.34547	0.000704807	0.00398485
IL1RAPL2	ENSG00000189108	-1.78229	2.76636	0.00149484	0.00746325
SPOCK3	ENSG00000196104	-1.78082	2.35268	0.0112461	0.0399441
SGCD	ENSG00000170624	-1.77594	3.24538	0.0069901	0.0269807
CNTN1	ENSG00000018236	-1.7524	2.0525	0.00420795	0.0177285
RP11-30J20.1	ENSG00000254101	-1.75005	2.53057	0.00509739	0.0207677
STPG2	ENSG00000163116	-1.71486	3.01272	0.00231014	0.0107081
NEO1	ENSG00000067141	-1.71302	1.96525	0.00802671	0.0303213
EGLN3	ENSG00000129521	-1.6892	2.63253	0.00889296	0.0330617
CTNNA2	ENSG00000066032	-1.67755	4.12939	0.00222837	0.0103957
NRCAM	ENSG00000091129	-1.66087	2.27351	0.0050847	0.020743
ARID1B	ENSG00000049618	-1.65133	2.08818	0.00679345	0.0263625
RGS3	ENSG00000138835	-1.64077	1.59636	0.0134365	0.0461023
VTI1A	ENSG00000151532	-1.63619	1.84031	0.00915527	0.0338626
HMCN1	ENSG00000143341	-1.57672	2.5475	0.0122264	0.0427787
ARHGEF3	ENSG00000163947	-1.5424	2.55545	0.00334812	0.014676
SGCZ	ENSG00000185053	-1.54134	3.74858	0.00646353	0.0252807
MYO5B	ENSG00000167306	-1.51322	2.29135	0.00866125	0.0323797
STX8	ENSG00000170310	-1.50219	1.82986	0.00775008	0.0293827
LPP	ENSG00000145012	-1.48923	3.08448	0.00858614	0.0321373
RP11-72M17.1	ENSG00000258561	-1.48287	2.64513	0.000437084	0.00264646
ENPEP	ENSG00000138792	-1.46757	2.02308	0.00677424	0.0263206
ASAP1	ENSG00000153317	-1.45439	2.37952	0.00496104	0.0202738
FYN	ENSG00000010810	-1.43631	1.87942	0.00534142	0.0216399
LYPLAL1-AS1	ENSG00000228063	-1.43375	2.61624	1.99188e-05	0.000171141
NYAP2	ENSG00000144460	-1.43313	2.33093	0.014621	0.0492842
RP11-348J24.2	ENSG00000250049	-1.43118	2.48778	0.00980242	0.0357771
EPB41L1	ENSG00000088367	-1.42948	2.12868	0.00351667	0.015283
CAMTA1	ENSG00000171735	-1.42689	3.5742	0.0131546	0.0453856
ALCAM	ENSG00000170017	-1.41223	1.83019	0.00320546	0.0141526
DOCK2	ENSG00000134516	-1.39233	2.70583	0.00411736	0.0173919
AASDHPPT	ENSG00000149313	-1.38745	2.40068	0.000152795	0.0010543
TMEM192	ENSG00000170088	-1.38573	1.72787	0.0122793	0.042916
KIAA0825	ENSG00000185261	-1.37596	2.39898	0.00859512	0.0321581
ZBED3-AS1	ENSG00000250802	-1.37274	1.58738	0.00907661	0.0336246
DLC1	ENSG00000164741	-1.36403	3.50507	2.57678e-05	0.000214154
ALPK1	ENSG00000073331	-1.3472	1.84595	0.0119946	0.0421406
SMIM20	ENSG00000250317	-1.34528	1.83309	0.00315303	0.0139407
XYLT1	ENSG00000103489	-1.34301	3.34881	0.000321499	0.00204276
STON2	ENSG00000140022	-1.34006	1.53917	0.0116267	0.0410785
HOTTIP	ENSG00000243766	-1.33184	1.73112	0.0016405	0.00808286
FAM174B	ENSG00000185442	-1.30763	2.02087	0.00274877	0.0124224
RAET1E-AS1	ENSG00000268592	-1.3007	1.95033	0.00046711	0.00280117
CTD-2288O8.1	ENSG00000248898	-1.24805	1.98699	0.00251082	0.0114709
ZNF43	ENSG00000198521	-1.24043	1.5129	0.00824684	0.0310405
NFIA	ENSG00000162599	-1.2375	2.86429	0.0102323	0.0370868
AC009264.1	ENSG00000234352	-1.23659	3.37161	0.00166834	0.00818567
RNF157	ENSG00000141576	-1.21362	2.19362	0.00216527	0.0101417
DST	ENSG00000151914	-1.19019	2.96785	0.00815076	0.0307332
CADPS2	ENSG00000081803	-1.1863	3.08526	0.00578298	0.0229924
MAPKAP1	ENSG00000119487	-1.17687	2.3836	0.0130927	0.04522
TTC41P	ENSG00000214198	-1.166	2.11933	0.00521727	0.021201
ADGB	ENSG00000118492	-1.16555	3.57065	1.28473e-05	0.000114359
SPATA17-AS1	ENSG00000234070	-1.13536	2.1735	0.00188843	0.00906194
LYPD6B	ENSG00000150556	-1.13176	2.73627	0.00829434	0.0311693
ZFAND5	ENSG00000107372	-1.11724	1.34392	0.0069128	0.0267272
KHDRBS3	ENSG00000131773	-1.10519	2.15289	0.012537	0.0436216
HECW2	ENSG00000138411	-1.10119	3.01468	0.00590073	0.0233813
RP11-191G24.1	ENSG00000227070	-1.09531	1.46349	0.0120443	0.0422835
TEKT4P2	ENSG00000188681	-1.08982	2.14722	0.00313727	0.0138831
RP11-350N15.6	ENSG00000272159	-1.0691	2.23451	0.00214205	0.0100429
CTA-363E6.5	ENSG00000260681	-1.06219	1.78286	0.00476281	0.0196173
RPS11P6	ENSG00000243024	-1.05124	3.65984	0.00026713	0.00174088
LRCH3	ENSG00000186001	-1.05021	2.00292	0.00824656	0.0310405
NAALADL2	ENSG00000177694	-1.04179	5.41919	1.92303e-05	0.000165833
TENM2	ENSG00000145934	-1.0413	4.33422	0.00576119	0.0229252
HS3ST4	ENSG00000182601	-1.0383	4.90995	6.65533e-07	7.353e-06
LINC00705	ENSG00000225269	-1.037	1.79914	0.00746285	0.0284893
ARHGAP40	ENSG00000124143	-1.02147	2.24015	0.00663379	0.0258283
CSMD1	ENSG00000183117	-1.01703	5.9787	5.85698e-05	0.000450106
NOB1	ENSG00000141101	-1.01453	3.82768	7.48614e-06	6.94687e-05
AC092573.2	ENSG00000236391	-1.01045	2.33355	0.0045775	0.0190041
AQP4-AS1	ENSG00000260372	-1.00611	3.73487	0.0010925	0.00574451
KBTBD11-OT1	ENSG00000253696	-1.0049	2.26971	0.00536789	0.0217097
SIPA1L1	ENSG00000197555	-1.00443	3.8482	0.000567461	0.00331613
UST	ENSG00000111962	-1.00146	3.55919	0.00519399	0.0211155
HOTAIRM1	ENSG00000233429	1.00019	3.62139	0.00013116	0.000919884
CIR1	ENSG00000138433	1.00048	3.1197	0.00302282	0.0134409
SUPT7L	ENSG00000119760	1.00138	6.4533	8.1427e-12	1.58319e-10
VLDLR	ENSG00000147852	1.00185	3.92518	5.98555e-05	0.000458859
ATG14	ENSG00000126775	1.00233	4.04709	1.835e-06	1.88952e-05
UBE2L3	ENSG00000185651	1.00276	4.16197	4.66528e-06	4.47971e-05
CTC-498M16.2	ENSG00000250156	1.00402	1.6625	0.0119767	0.0420934
RP11-395C3.1	ENSG00000230929	1.0049	1.87512	0.00610411	0.0240452
ADRM1	ENSG00000130706	1.00523	8.62831	1.13e-07	1.40314e-06
FER1L5	ENSG00000249715	1.00539	3.1804	0.00196752	0.00938396
AC005775.2	ENSG00000266933	1.01076	2.35849	0.00939768	0.0346772
KCNK12	ENSG00000184261	1.01464	5.40331	6.57463e-09	9.54287e-08
RGPD2	ENSG00000185304	1.01504	3.44336	0.00058403	0.00339816
LMTK3	ENSG00000142235	1.01548	5.16248	1.29401e-08	1.83e-07
RRP36	ENSG00000124541	1.01792	1.6879	0.0135093	0.0462982
CEP57	ENSG00000166037	1.02219	4.51049	2.78963e-08	3.764e-07
RP11-50C13.1	ENSG00000259250	1.02337	6.34507	1.47278e-13	3.30883e-12
TUFM	ENSG00000178952	1.02467	1.85311	0.00689875	0.0266939
ARL13B	ENSG00000169379	1.02517	4.24317	1.3233e-06	1.40103e-05
MTMR2	ENSG00000087053	1.02645	3.76749	1.29139e-05	0.000114734
KCTD20	ENSG00000112078	1.02655	2.98445	0.00164901	0.00811203
GPATCH4	ENSG00000160818	1.02799	4.69443	9.75259e-08	1.22115e-06
HSF4	ENSG00000102878	1.02984	2.04334	0.00495301	0.0202498
KCTD9	ENSG00000104756	1.02998	4.80729	8.72777e-09	1.25325e-07
SUN1	ENSG00000164828	1.03069	2.16107	0.0126242	0.043844
CEP68	ENSG00000011523	1.03139	5.53241	7.64482e-10	1.23355e-08
CTD-2015H6.3	ENSG00000249042	1.03319	2.23765	0.0114223	0.0404626
NRG4	ENSG00000169752	1.03492	8.15979	2.48436e-12	4.98517e-11
ROPN1B	ENSG00000114547	1.03523	2.11377	0.00945507	0.0347777
MYRF	ENSG00000124920	1.03561	5.15763	1e-09	1.54217e-08
ZNF862	ENSG00000106479	1.03606	3.68442	3.77977e-05	0.000303383
JPH3	ENSG00000154118	1.03811	5.28124	3.6533e-09	5.51578e-08
RP3-337H4.8	ENSG00000203362	1.03826	2.62636	0.00211877	0.00995472
PRKCZ	ENSG00000067606	1.0387	5.49086	6.21744e-10	1.00843e-08
TMEM190	ENSG00000160472	1.03885	2.48899	0.0131551	0.0453856
GGN	ENSG00000179168	1.04041	4.98268	7.2712e-07	7.96778e-06
C21orf2	ENSG00000160226	1.04258	4.70165	3.80262e-07	4.36557e-06
SPNS2	ENSG00000183018	1.04338	6.55217	1.91494e-10	3.28161e-09
C11orf42	ENSG00000180878	1.04413	4.69212	8.39456e-07	9.1348e-06
TCF7	ENSG00000081059	1.04424	4.57679	2.86618e-07	3.37049e-06
ZDHHC5	ENSG00000156599	1.0465	2.74194	0.00113163	0.00590725
DDX55	ENSG00000111364	1.04662	3.74558	1.19883e-05	0.000107324
ACSM4	ENSG00000215009	1.04751	2.26996	0.0062189	0.0244563
RP11-712B9.2	ENSG00000245552	1.04957	3.48923	0.000342447	0.0021572
NDUFAF2	ENSG00000164182	1.05275	4.75493	9.35139e-08	1.1772e-06
ZBTB11-AS1	ENSG00000256628	1.05386	3.97641	1.98756e-06	2.03546e-05
FABP3	ENSG00000121769	1.05554	4.83691	6.86845e-09	9.95396e-08
DTYMK	ENSG00000168393	1.05638	3.36886	0.00030518	0.00195095
LRRC57	ENSG00000180979	1.05814	2.80862	0.00294814	0.0131775
LINC00242	ENSG00000229214	1.05821	3.00794	0.00141645	0.00714003
PSMC3IP	ENSG00000131470	1.05988	6.71855	1.72569e-11	3.28056e-10
SLC25A15	ENSG00000102743	1.06005	2.78738	0.00143322	0.00720907
GLT8D1	ENSG00000016864	1.06216	5.41636	3.05708e-09	4.653e-08
MINK1	ENSG00000141503	1.06257	2.01116	0.00627518	0.0246261
CDK7	ENSG00000134058	1.06371	3.00968	0.00101288	0.00540143
SMC4	ENSG00000113810	1.06408	4.79442	1.98803e-08	2.73748e-07
MAN2A2	ENSG00000196547	1.06446	1.61434	0.00672866	0.0261543
CHRDL2	ENSG00000054938	1.06463	2.24722	0.00553481	0.0221936
RPL12	ENSG00000197958	1.06528	4.35787	4.19782e-07	4.79e-06
HORMAD2-AS1	ENSG00000227117	1.06549	4.76539	3.05196e-07	3.57815e-06
ADORA2B	ENSG00000170425	1.06557	1.98281	0.00948852	0.0348618
ALS2CR11	ENSG00000155754	1.06586	4.37791	7.51213e-06	6.96411e-05
CCNI	ENSG00000118816	1.06591	1.97055	0.00604754	0.0238824
CTD-2012K14.6	ENSG00000261386	1.06741	1.959	0.00869908	0.0324953
CYB5R2	ENSG00000166394	1.06812	2.89865	0.00536086	0.0216999
AC124944.3	ENSG00000226155	1.06892	1.91807	0.00433605	0.0181704
LAT2	ENSG00000086730	1.07522	4.47748	8.07528e-07	8.82828e-06
PTK6	ENSG00000101213	1.07523	3.86287	6.26057e-06	5.88519e-05
ITGB5	ENSG00000082781	1.07587	4.1962	0.00120055	0.00623237
BBIP1	ENSG00000214413	1.07634	6.20433	1.8585e-11	3.51879e-10
SLC47A2	ENSG00000180638	1.07725	6.3116	3.85625e-14	9.05351e-13
BLNK	ENSG00000095585	1.07768	3.07044	0.00218842	0.0102399
LA16c-312E8.4	ENSG00000279930	1.07863	2.1204	0.00757739	0.0288678
PKDREJ	ENSG00000130943	1.0807	1.84001	0.00668613	0.0260023
COA3	ENSG00000183978	1.08087	5.93377	6.17406e-09	9.0172e-08
KCNA7	ENSG00000104848	1.0819	2.83857	0.000862349	0.00471648
LA16c-60H5.7	ENSG00000215270	1.08362	3.26429	0.000763793	0.00425937
WDCP	ENSG00000163026	1.08423	1.9845	0.00538091	0.0217342
FKBP10	ENSG00000141756	1.08441	2.58668	0.00184726	0.00890533
SPATA2L	ENSG00000158792	1.08474	1.51867	0.0110103	0.03927
SART1	ENSG00000175467	1.08554	1.66496	0.00700662	0.0270333
PEA15	ENSG00000162734	1.08636	4.69072	1.19694e-07	1.479e-06
AC007193.6	ENSG00000267922	1.08816	7.9264	4.82685e-14	1.122e-12
PGM5P4	ENSG00000225398	1.08858	2.23044	0.00787914	0.0298359
NT5C3A	ENSG00000122643	1.0894	2.81482	0.00280711	0.0126374
RP13-1032I1.11	ENSG00000275902	1.09252	2.09111	0.00400218	0.0169989
ANAPC11	ENSG00000141552	1.09498	6.13512	4.20414e-09	6.31698e-08
TRAF7	ENSG00000131653	1.09639	2.72295	0.00383972	0.0164652
SLC16A8	ENSG00000100156	1.0965	4.74878	1.82885e-05	0.000158292
PARP14	ENSG00000173193	1.09709	2.99066	0.00170588	0.00833068
CTD-3137H5.1	ENSG00000268199	1.09978	4.27816	1.76871e-06	1.82527e-05
SNRNP200	ENSG00000144028	1.09988	2.59471	0.00562849	0.0225116
PLCB3	ENSG00000149782	1.10097	2.75783	0.00242596	0.0111677
MPL	ENSG00000117400	1.10249	2.62368	0.000887061	0.00483201
BUD31	ENSG00000106245	1.10495	5.81277	4.37815e-12	8.6741e-11
INHBC	ENSG00000175189	1.10633	2.1811	0.003666	0.0158214
CNTNAP1	ENSG00000108797	1.10782	4.31627	5.18511e-08	6.80075e-07
MASP2	ENSG00000009724	1.10903	5.96254	2.94265e-14	6.99606e-13
RP13-735L24.1	ENSG00000260423	1.10942	4.52346	8.15959e-09	1.17346e-07
KIFC1	ENSG00000237649	1.11196	3.30362	0.00011136	0.000794668
NOC3L	ENSG00000173145	1.11305	3.38587	0.000124184	0.000878172
UBXN8	ENSG00000104691	1.1151	3.07795	0.000371232	0.00230408
GNB4	ENSG00000114450	1.11517	3.99699	1.11624e-06	1.19664e-05
COX7A1	ENSG00000161281	1.1155	2.96427	0.0016524	0.00812445
NADK2	ENSG00000152620	1.11551	5.13536	5.05603e-12	9.97503e-11
NMT1	ENSG00000136448	1.11613	5.74177	3.28358e-13	7.13799e-12
LLNLR-259H9.1	ENSG00000280282	1.11623	1.50361	0.00466685	0.0192983
PROCR	ENSG00000101000	1.11685	3.5839	7.60481e-05	0.00056827
ITGB7	ENSG00000139626	1.12064	5.51899	1.02685e-12	2.13345e-11
RP1-102E24.1	ENSG00000213942	1.12139	1.76373	0.00386715	0.0165526
RP11-400F19.6	ENSG00000266962	1.12175	3.77685	9.65116e-06	8.79088e-05
PCOLCE-AS1	ENSG00000224729	1.12293	4.13612	8.94676e-07	9.69077e-06
HAGH	ENSG00000063854	1.12326	3.78352	1.11174e-06	1.19318e-05
MST1	ENSG00000173531	1.12548	3.27237	7.25761e-05	0.00054525
NAPEPLD	ENSG00000161048	1.1265	6.25689	1.2603e-12	2.58416e-11
SERF2	ENSG00000140264	1.1271	2.32745	0.00268027	0.0121537
RP11-554A11.8	ENSG00000261070	1.1295	3.58939	1.77938e-05	0.000154438
RP11-374P20.4	ENSG00000235138	1.13161	3.74094	0.000172484	0.00117376
EPN2-AS1	ENSG00000235397	1.13587	3.6773	7.59374e-05	0.00056823
DRC3	ENSG00000171962	1.13656	6.21224	2.98342e-13	6.53083e-12
AC004381.6	ENSG00000005189	1.13775	2.58422	0.00382463	0.016408
SPARCL1	ENSG00000152583	1.13866	2.78045	0.00192525	0.00921511
GNAT2	ENSG00000134183	1.13966	4.94828	4.82889e-08	6.36912e-07
METTL7A	ENSG00000185432	1.14037	2.71286	0.000936737	0.0050586
ACSS2	ENSG00000131069	1.14127	5.32944	2.48384e-13	5.46271e-12
SLC25A3	ENSG00000075415	1.14225	2.56606	0.00216271	0.0101347
TOR1B	ENSG00000136816	1.14276	3.34193	8.59462e-05	0.000632363
SNORA74	ENSG00000252129	1.14304	2.81755	0.000848374	0.00465095
EIF2B2	ENSG00000119718	1.14379	5.1438	6.57708e-12	1.28678e-10
LYSMD3	ENSG00000176018	1.14435	2.92399	0.000805268	0.0044484
XXbac-B444P24.10	ENSG00000161132	1.14486	2.76277	0.000387826	0.00238512
KRTAP5-1	ENSG00000205869	1.14694	1.90895	0.00405001	0.0171709
RIF1	ENSG00000080345	1.14775	4.76072	1.50622e-08	2.11434e-07
BAP1	ENSG00000163930	1.15574	2.36156	0.00230098	0.0106773
GRTP1	ENSG00000139835	1.15698	4.22403	6.61189e-08	8.50579e-07
TALDO1	ENSG00000177156	1.15723	4.03738	8.26151e-07	9.02138e-06
HNRNPF	ENSG00000169813	1.15971	2.66927	0.00049209	0.00292667
THBS2	ENSG00000186340	1.16106	3.68468	1.02506e-05	9.2829e-05
CCDC92	ENSG00000119242	1.16218	2.23166	0.00572542	0.0228187
YARS	ENSG00000134684	1.1626	3.0569	0.00115751	0.00602559
CDH23	ENSG00000107736	1.1643	8.41201	1.14913e-10	2e-09
RP11-826N14.4	ENSG00000251623	1.16433	2.29827	0.00331755	0.0145994
RP11-661A12.9	ENSG00000255050	1.16625	7.98003	3.20209e-11	5.89625e-10
FBXO10	ENSG00000147912	1.16632	2.58195	0.000676248	0.00385823
GTPBP1	ENSG00000100226	1.16951	2.91839	0.000438716	0.00265463
MYH10	ENSG00000133026	1.17032	6.73904	8.98547e-14	2.04812e-12
RHPN2	ENSG00000131941	1.1735	4.07814	2.42381e-05	0.000203961
ZBTB46	ENSG00000130584	1.17355	7.22117	5.45615e-15	1.37738e-13
KIF20A	ENSG00000112984	1.17707	4.39194	2.80118e-09	4.28434e-08
ARPC1B	ENSG00000130429	1.18189	4.39379	8.70115e-07	9.44653e-06
PLAT	ENSG00000104368	1.18273	3.2729	6.98062e-05	0.000526124
HACD3	ENSG00000074696	1.18366	3.17445	0.000366041	0.00228102
SFT2D3	ENSG00000173349	1.18438	5.12682	2.98971e-12	5.97369e-11
LINC01534	ENSG00000225975	1.18545	1.60434	0.00257232	0.0117038
SLC38A10	ENSG00000157637	1.18703	5.19322	7.85484e-09	1.1331e-07
DNAH2	ENSG00000183914	1.18704	1.9954	0.0107363	0.0385269
AQP7	ENSG00000165269	1.18784	1.67838	0.00313851	0.0138831
LRRC37A6P	ENSG00000230445	1.18982	2.59386	0.00207493	0.00979672
RP11-184M15.2	ENSG00000248802	1.19067	2.01627	0.00527206	0.0214051
YIF1B	ENSG00000167645	1.19415	4.14787	1.0127e-06	1.09188e-05
PAFAH1B1	ENSG00000007168	1.19695	2.38519	0.00398592	0.0169528
DGAT1	ENSG00000185000	1.20166	2.98669	0.000306467	0.00195518
ANKRD42	ENSG00000137494	1.2019	4.8392	3.34812e-09	5.08774e-08
RNF24	ENSG00000101236	1.2037	7.50016	5.25422e-19	1.8275e-17
AIMP2	ENSG00000106305	1.2042	6.68738	6.4565e-19	2.20484e-17
DPYSL4	ENSG00000151640	1.20471	3.47811	3.19616e-05	0.000258528
TFAP2E	ENSG00000116819	1.20578	3.86824	2.43594e-07	2.92531e-06
ABTB2	ENSG00000166016	1.20589	6.10054	3.81057e-11	6.97565e-10
NOXO1	ENSG00000196408	1.20826	5.82197	9.85597e-11	1.73328e-09
PPM1G	ENSG00000115241	1.21185	2.31176	0.00366087	0.0158065
TRMU	ENSG00000100416	1.21255	6.20643	1.69785e-12	3.43632e-11
STAB2	ENSG00000136011	1.21334	6.02834	5.17271e-16	1.39189e-14
LAMB1	ENSG00000091136	1.2143	5.06836	3.2019e-13	6.97657e-12
KRT87P	ENSG00000135477	1.21584	8.6556	5.66415e-18	1.77015e-16
HTATSF1P2	ENSG00000271361	1.21647	3.30934	2.32223e-05	0.000196646
CD99L2	ENSG00000102181	1.21654	1.6162	0.00537351	0.0217137
NPB	ENSG00000183979	1.21675	5.55924	8.91328e-12	1.72587e-10
LL0XNC01-237H1.3	ENSG00000234050	1.22494	2.0078	0.00365341	0.0157816
RBFOX3	ENSG00000167281	1.22539	5.24174	5.59e-07	6.27928e-06
RP11-793H13.11	ENSG00000270175	1.22686	2.20248	0.00134759	0.0068592
KIAA0196	ENSG00000164961	1.22716	5.03133	2.97395e-11	5.4977e-10
NRBF2P5	ENSG00000270427	1.22815	2.11159	0.00093752	0.00505991
AC006486.10	ENSG00000279539	1.23049	4.337	2.11069e-08	2.89365e-07
MUC4	ENSG00000145113	1.23143	4.25915	2.06169e-08	2.83475e-07
RP11-452L6.5	ENSG00000260267	1.23244	1.97944	0.00808864	0.0305307
B4GALNT1	ENSG00000135454	1.23346	4.51506	2.27212e-09	3.51523e-08
IMPDH2	ENSG00000178035	1.2342	5.8627	2.31587e-16	6.46085e-15
C9orf139	ENSG00000180539	1.23614	3.15012	6.97448e-05	0.000526124
CASP8	ENSG00000064012	1.23692	4.23765	9.4941e-08	1.192e-06
U3	ENSG00000221496	1.23933	1.99179	0.00153687	0.00763561
RP11-316M21.7	ENSG00000236308	1.24084	1.82611	0.00600649	0.0237603
RAD51	ENSG00000051180	1.24326	3.5322	5.54507e-06	5.27063e-05
ENTPD7	ENSG00000198018	1.24423	3.94525	5.5e-08	7.17866e-07
CCDC189	ENSG00000196118	1.24461	5.69282	3.17932e-12	6.33907e-11
TAT-AS1	ENSG00000260886	1.24501	2.15925	0.00198036	0.00942157
SLC20A2	ENSG00000168575	1.24742	3.34058	0.00193344	0.00924016
C9orf16	ENSG00000171159	1.24935	4.01416	2.94408e-08	3.96102e-07
ASS1P12	ENSG00000237437	1.25182	2.30356	0.00245305	0.0112648
SMIM22	ENSG00000267795	1.2531	3.17017	0.000362395	0.0022628
GDF11	ENSG00000135414	1.25594	5.07522	5.08534e-13	1.09033e-11
PTPN6	ENSG00000111679	1.25702	1.57181	0.00150518	0.00750275
RP11-1334A24.6	ENSG00000248996	1.25826	7.78429	1.27259e-16	3.61054e-15
RP11-551L14.7	ENSG00000270926	1.25913	3.27983	1.97626e-05	0.000170111
CTD-2560E9.3	ENSG00000254664	1.26438	6.26254	4.33619e-18	1.37572e-16
MAP3K19	ENSG00000176601	1.26479	2.69814	0.00403072	0.0171046
CCDC153	ENSG00000248712	1.26562	2.18595	0.00112156	0.00586448
ST3GAL2	ENSG00000157350	1.26627	5.00601	2.81407e-13	6.17453e-12
FAM156A	ENSG00000268350	1.26631	3.12062	9.07756e-05	0.000661859
CDAN1	ENSG00000140326	1.26683	2.45385	0.00298486	0.0132848
SNORA2	ENSG00000206647	1.26808	1.60804	0.00169014	0.00827968
FLJ12825	ENSG00000248265	1.26947	3.58852	9.76393e-07	1.05637e-05
AC141586.5	ENSG00000215154	1.27084	2.85565	0.000229615	0.00152497
ALK	ENSG00000171094	1.27247	4.96119	0.00158668	0.00785066
PPIA	ENSG00000196262	1.27296	3.23034	1.2057e-05	0.000107835
KCTD19	ENSG00000168676	1.2738	2.98952	7.97202e-05	0.000593738
MUC6	ENSG00000184956	1.27432	4.60588	2.51e-07	3.0027e-06
DNAJC11	ENSG00000007923	1.27497	3.94808	4.31208e-06	4.17042e-05
ARGFXP2	ENSG00000265293	1.2758	1.26404	0.00184524	0.00890287
CAP1	ENSG00000131236	1.27744	3.14154	2.48577e-05	0.000208056
GNPDA1	ENSG00000113552	1.27794	4.92788	6.70835e-13	1.41569e-11
RAC1	ENSG00000136238	1.27883	1.49169	0.00144753	0.00726939
XPA	ENSG00000136936	1.27948	6.3381	7.10623e-19	2.40919e-17
RSPH4A	ENSG00000111834	1.28263	3.27165	3.05461e-05	0.000248837
SOX10	ENSG00000100146	1.28512	2.26732	0.00396247	0.016876
SLC12A7	ENSG00000113504	1.28873	2.43705	0.000382008	0.00235705
EPX	ENSG00000121053	1.28882	3.2031	1.34602e-05	0.000118913
CORO1A	ENSG00000102879	1.28903	2.74573	0.000767448	0.00427468
ARF1	ENSG00000143761	1.29036	1.71843	0.000971059	0.00521694
XRCC3	ENSG00000126215	1.29057	7.19088	1.88039e-13	4.1648e-12
WDSUB1	ENSG00000196151	1.2908	4.19689	3.59283e-08	4.79948e-07
NDUFAF1	ENSG00000137806	1.29118	2.3127	0.00072236	0.00407184
HSBP1L1	ENSG00000226742	1.2923	3.96004	1.32095e-07	1.628e-06
RP11-264B17.5	ENSG00000261552	1.29313	5.13993	5.79278e-11	1e-09
CHRNG	ENSG00000196811	1.2933	2.70318	0.000153549	0.00105872
CTB-186G2.4	ENSG00000267375	1.29345	3.30124	9.43759e-06	8.62984e-05
CLDND2	ENSG00000160318	1.29373	1.49953	0.00200506	0.00950986
FBXL8	ENSG00000135722	1.29649	1.77604	0.00166511	0.00817408
RP11-714G18.1	ENSG00000250410	1.298	3.11639	2.77548e-05	0.000228436
ABHD12B	ENSG00000131969	1.29824	5.00287	3.05214e-13	6.66574e-12
LZTR1	ENSG00000099949	1.29959	2.48885	0.000310068	0.00197682
RP11-16C1.3	ENSG00000265987	1.30087	1.81093	0.00230123	0.0106773
SGSM3	ENSG00000100359	1.30127	7.12631	2.59913e-18	8.38777e-17
NXF1	ENSG00000162231	1.30208	2.73782	0.00063958	0.00367133
RRAS	ENSG00000126458	1.3062	3.47563	1.79187e-06	1.84714e-05
CD74	ENSG00000019582	1.30683	3.98704	8.90529e-09	1.27679e-07
GNPNAT1	ENSG00000100522	1.30854	3.5036	3.6887e-06	3.63872e-05
KIAA1614	ENSG00000135835	1.30984	5.60411	1.15584e-14	2.81936e-13
RP11-83A24.2	ENSG00000273247	1.31056	4.1618	8.67501e-10	1.39022e-08
RP5-864K19.7	ENSG00000273637	1.31356	2.56596	0.000347739	0.00218436
DNASE1L1	ENSG00000013563	1.31358	5.34653	8.45389e-13	1.76816e-11
BTBD2	ENSG00000133243	1.31443	5.57587	1.51272e-11	2.89326e-10
RP4-738P15.1	ENSG00000230725	1.31539	1.66657	0.000684282	0.00389389
WDR26	ENSG00000162923	1.31745	3.52511	7.21263e-06	6.70631e-05
PIK3IP1	ENSG00000100100	1.31985	2.62935	0.000169682	0.00115974
RP5-1024G6.5	ENSG00000226754	1.32078	6.0693	3.19728e-16	8.75385e-15
RARA-AS1	ENSG00000265666	1.32296	1.99615	0.00221755	0.0103504
MAML1	ENSG00000161021	1.32704	3.77402	1.671e-07	2.038e-06
TRPC5	ENSG00000072315	1.3287	2.73556	0.0104379	0.03773
TMEM160	ENSG00000130748	1.33034	1.92617	0.000777945	0.00431483
ZNF142	ENSG00000115568	1.33045	3.53618	2.63721e-06	2.65445e-05
POLRMT	ENSG00000099821	1.33148	4.78719	2.63648e-09	4.05225e-08
SEMA3B-AS1	ENSG00000232352	1.33351	3.13775	0.000111112	0.000793498
RP11-381E24.4	ENSG00000276763	1.33359	2.09664	0.000752798	0.00421307
MAPK8	ENSG00000107643	1.33391	3.71198	3.83952e-06	3.77164e-05
APEX1	ENSG00000100823	1.33946	2.30728	0.00183348	0.00885256
AC068196.1	ENSG00000238171	1.33947	2.46137	0.000491167	0.00292304
ABHD3	ENSG00000158201	1.35394	2.19496	0.000783626	0.00433905
SLF2	ENSG00000119906	1.35783	3.1427	1.33235e-05	0.000118039
SLC35A3	ENSG00000117620	1.36017	2.20485	0.00224499	0.0104473
LRRC46	ENSG00000141294	1.36108	2.7013	0.000158221	0.00108774
ATP8B5P	ENSG00000179766	1.36736	4.07939	5.2e-08	6.80643e-07
JOSD1	ENSG00000100221	1.36783	2.90757	1.8055e-05	0.000156416
SLC25A18	ENSG00000182902	1.36944	4.35978	2.11419e-11	3.97883e-10
HMGB3P24	ENSG00000215283	1.37067	1.83807	0.00130703	0.00668768
CIC	ENSG00000079432	1.37143	2.16988	0.000383741	0.00236619
RP11-347C12.10	ENSG00000260219	1.37253	2.82772	0.000216093	0.00144129
TIGD7	ENSG00000140993	1.37258	3.82011	3.66121e-07	4.20837e-06
PITPNM3	ENSG00000091622	1.37412	3.16864	0.000148154	0.00102604
COL4A6	ENSG00000197565	1.37415	2.35747	0.00100012	0.00534249
RP11-353N14.4	ENSG00000262188	1.37762	2.13506	0.00146126	0.00732269
TNS4	ENSG00000131746	1.37791	5.80526	2.20514e-17	6.68017e-16
SLC25A4	ENSG00000151729	1.38121	2.98181	1.31145e-05	0.000116407
KCNG2	ENSG00000178342	1.38419	3.12184	0.0001311	0.000919884
GAS2	ENSG00000148935	1.38577	2.86819	0.00178476	0.00864843
RP11-1000B6.2	ENSG00000241818	1.39546	4.37274	1.62675e-09	2.52928e-08
C1orf159	ENSG00000131591	1.39692	2.66267	0.00352727	0.0153213
RP11-167N24.3	ENSG00000257943	1.39739	2.62927	0.0023117	0.01071
IRF3	ENSG00000126456	1.40216	4.51437	1.44745e-10	2.51256e-09
CTC-241N9.1	ENSG00000245317	1.40639	1.85374	0.000528351	0.00312059
RP11-192M23.1	ENSG00000259381	1.4087	2.6217	2.44529e-05	0.0002054
GLDC	ENSG00000178445	1.41113	2.78293	0.00473414	0.0195308
CFAP100	ENSG00000163885	1.41374	2.1184	0.000381596	0.00235606
TROVE2	ENSG00000116747	1.41521	4.55124	3.2194e-12	6.40537e-11
RP3-522J7.7	ENSG00000279345	1.41528	1.6474	0.00173486	0.00845025
ZNF24	ENSG00000172466	1.41602	1.98129	0.000460854	0.00276718
COPG2	ENSG00000158623	1.41614	5.68873	2.22385e-15	5.69051e-14
PM20D1	ENSG00000162877	1.41812	1.50318	0.000427622	0.00259681
ZSCAN31	ENSG00000235109	1.42161	3.41549	4.73186e-06	4.53901e-05
RWDD2A	ENSG00000013392	1.4226	1.89876	0.00063881	0.00367133
CTD-2095E4.4	ENSG00000280020	1.42526	1.71529	0.00068533	0.00389584
TSG101	ENSG00000074319	1.42807	2.63838	0.000684571	0.00389389
PTPN23	ENSG00000076201	1.43101	3.70757	4.12701e-08	5.49e-07
CTD-2530N21.4	ENSG00000254064	1.43377	5.60022	4.35653e-20	1.6631e-18
KIAA1147	ENSG00000257093	1.43547	4.12242	7.1e-08	9.06543e-07
PLIN4	ENSG00000167676	1.43608	5.04828	4.93866e-10	8.10821e-09
PSMA7	ENSG00000101182	1.43754	2.39899	0.000234529	0.00155322
PDK2	ENSG00000005882	1.43774	2.41101	0.000334494	0.00211673
HPCAL1	ENSG00000115756	1.43954	2.77857	0.000568352	0.00331928
NDUFS7	ENSG00000115286	1.44265	4.75939	6.86674e-15	1.70147e-13
RP4-800J21.3	ENSG00000218018	1.4428	4.26246	1.61762e-07	1.97544e-06
PIGZ	ENSG00000119227	1.44307	2.04681	0.000960523	0.00517217
ADCY7	ENSG00000121281	1.44733	6.2713	2.00676e-21	8.48894e-20
PRDX3P2	ENSG00000231468	1.44749	2.34248	0.000191201	0.00129178
DOK7	ENSG00000175920	1.45046	3.03603	0.000420403	0.00256032
COMT	ENSG00000093010	1.45199	1.86117	0.000339278	0.0021398
ASAP2	ENSG00000151693	1.45408	5.65814	2.7728e-20	1.07601e-18
RASGRP4	ENSG00000171777	1.45451	3.10822	6.84052e-05	0.000518896
ACPT	ENSG00000142513	1.45513	3.03483	0.000141155	0.000982327
PLCH2	ENSG00000149527	1.45515	3.05614	9.88361e-05	0.000716733
PPM1E	ENSG00000175175	1.45601	4.79608	1.7426e-14	4.20688e-13
GHRLOS	ENSG00000240288	1.45639	2.24937	0.000233728	0.001549
RP11-509A17.3	ENSG00000258654	1.45843	3.21908	5.62054e-05	0.000432998
ZMYND10-AS1	ENSG00000235058	1.45886	3.57876	1.70422e-06	1.76453e-05
ORC2	ENSG00000115942	1.45891	2.35936	0.00026663	0.00173883
MNT	ENSG00000070444	1.46402	3.90854	1.01376e-08	1.44464e-07
REC8	ENSG00000100918	1.46506	4.37731	3.23888e-10	5.43148e-09
RP4-622L5.7	ENSG00000224066	1.4712	5.053	9.84049e-14	2.23218e-12
CACNA1G-AS1	ENSG00000250107	1.4714	3.81418	3.63288e-08	4.84607e-07
CNTRL	ENSG00000119397	1.47402	4.20005	1.68745e-10	2.91838e-09
ABR	ENSG00000159842	1.47555	6.34638	3.99568e-13	8.64596e-12
JAKMIP3	ENSG00000188385	1.47989	3.71404	3.57396e-09	5.4e-08
STRA13	ENSG00000169689	1.49358	3.48328	3.17722e-06	3.15072e-05
COA5	ENSG00000183513	1.49358	2.43595	0.000244241	0.00161072
POLR2E	ENSG00000099817	1.4937	2.66874	2.98232e-05	0.000243963
ALKBH4	ENSG00000160993	1.49378	3.07063	8.656e-06	7.96945e-05
CLDN5	ENSG00000184113	1.49541	1.41888	0.00135471	0.00688796
RP11-188C12.3	ENSG00000203987	1.49684	1.56505	0.000305568	0.0019521
DHRS7	ENSG00000100612	1.49723	4.86079	5.73361e-17	1.68264e-15
RMDN1	ENSG00000176623	1.49835	5.44971	4.40376e-20	1.67432e-18
SRPRA	ENSG00000182934	1.50703	4.2613	4.01307e-13	8.66362e-12
BMP8B	ENSG00000116985	1.50847	5.25896	1.47903e-16	4.1836e-15
UPK1A-AS1	ENSG00000226510	1.51001	1.50384	0.000534565	0.00314937
POLR2C	ENSG00000102978	1.51368	2.92389	1.97624e-06	2.02607e-05
LINC01389	ENSG00000225762	1.51372	3.94195	2.68823e-10	4.54868e-09
KANK3	ENSG00000186994	1.51482	4.81745	1.42866e-10	2.48916e-09
MRPS34	ENSG00000074071	1.51521	2.3241	5.04141e-05	0.000392895
NR2E3	ENSG00000278570	1.51567	3.26081	1.02377e-06	1.10255e-05
PHF19	ENSG00000119403	1.51686	2.1439	6.19066e-05	0.000472655
RECQL5	ENSG00000108469	1.51743	5.74385	4.96983e-18	1.57144e-16
ALG12	ENSG00000182858	1.52448	3.30461	4.40324e-06	4.2542e-05
FBXW12	ENSG00000164049	1.52539	4.07825	7.18707e-11	1.27829e-09
SOD1	ENSG00000142168	1.52544	4.69496	2.2692e-17	6.85211e-16
STAU2-AS1	ENSG00000253302	1.52726	4.62106	1.77747e-13	3.9555e-12
TGM1	ENSG00000092295	1.52735	2.0137	0.000502374	0.00298217
ZSCAN30	ENSG00000186814	1.52872	3.64168	9.27394e-08	1.169e-06
STKLD1	ENSG00000198870	1.53356	3.81595	4.8484e-10	8e-09
PXK	ENSG00000168297	1.5407	6.3697	1.65089e-26	1.00023e-24
AATBC	ENSG00000215458	1.54286	3.30846	4.20178e-06	4.07633e-05
SLC6A7	ENSG00000011083	1.54322	2.09437	0.000402448	0.00246536
ABCG5	ENSG00000138075	1.54729	2.9327	1.32611e-06	1.4014e-05
CTD-2201I18.1	ENSG00000249825	1.54955	2.49066	3.10484e-05	0.00025201
LILRA6	ENSG00000244482	1.5499	2.61286	1.66124e-05	0.000144854
XYLT2	ENSG00000015532	1.5544	4.74389	2.74949e-14	6.55342e-13
CCND1	ENSG00000110092	1.55986	3.34456	3.1508e-06	3.13113e-05
QRICH1	ENSG00000198218	1.56033	2.05516	5.22369e-05	0.000405419
NODAL	ENSG00000156574	1.56083	3.17423	1.51219e-06	1.57789e-05
DNALI1	ENSG00000163879	1.56168	3.37509	8.2351e-08	1.04389e-06
CTD-3214H19.6	ENSG00000268204	1.56583	2.87184	8.46473e-05	0.000623469
PDE6C	ENSG00000095464	1.56743	5.58852	1.26999e-22	5.84633e-21
BCL9	ENSG00000116128	1.56869	3.96734	4.50592e-09	6.72736e-08
LIMK2	ENSG00000182541	1.57211	4.1193	2.81946e-12	5.64554e-11
AC000068.5	ENSG00000185065	1.57405	2.60588	2.59679e-05	0.000215238
PHYHIP	ENSG00000168490	1.57578	1.98429	8.33597e-05	0.000615917
BRAF	ENSG00000157764	1.5779	4.82651	1.16551e-12	2.40028e-11
DSCR9	ENSG00000230366	1.58007	2.98902	4.80835e-07	5.46674e-06
RASGRP1	ENSG00000172575	1.58039	4.21364	4.59322e-13	9.8707e-12
CTSB	ENSG00000164733	1.58633	5.26813	5.24124e-20	1.97673e-18
NASP	ENSG00000132780	1.58633	3.13777	2.44e-07	2.927e-06
NAALAD2	ENSG00000077616	1.58875	7.15095	1.24681e-29	8.87032e-28
GALNS	ENSG00000141012	1.58987	3.65675	4.85999e-09	7.22154e-08
GPR62	ENSG00000180929	1.59045	1.7718	6.40691e-05	0.000488768
RP11-513M16.8	ENSG00000273226	1.59103	2.74786	8.92669e-05	0.000652886
RP11-403A21.1	ENSG00000265752	1.59534	3.74305	3.34023e-10	5.5716e-09
EIF3G	ENSG00000130811	1.60772	3.23937	6.22933e-08	8.03567e-07
SON	ENSG00000159140	1.61003	4.98477	8.52742e-18	2.64294e-16
MLST8	ENSG00000167965	1.61538	3.07501	3.62208e-07	4.17874e-06
EFEMP2	ENSG00000172638	1.6213	2.54698	4.19303e-05	0.000332574
NIT2	ENSG00000114021	1.62623	5.21721	7.00018e-19	2.38184e-17
PRKCA-AS1	ENSG00000264630	1.62689	1.55095	4.54841e-05	0.000357441
HIGD1C	ENSG00000214511	1.62748	2.81103	5.97598e-07	6.689e-06
SLC25A22	ENSG00000177542	1.62933	4.31589	4.48313e-09	6.7e-08
CTD-2561B21.5	ENSG00000261924	1.6312	4.21578	8.59114e-10	1.37913e-08
C16orf86	ENSG00000159761	1.63131	2.40431	9.56959e-05	0.000695035
ST5	ENSG00000166444	1.63148	5.2262	9.42739e-14	2.14365e-12
RP11-1223D19.6	ENSG00000283167	1.63582	2.70044	2.55178e-05	0.000212633
HNRNPA3	ENSG00000170144	1.63646	3.6502	3.71424e-09	5.6e-08
EIF2AK4	ENSG00000128829	1.63996	5.60938	1.62794e-25	9.26544e-24
TBX1	ENSG00000184058	1.64255	4.32348	6.79381e-14	1.57144e-12
SLC37A2	ENSG00000134955	1.64364	2.59977	9.26558e-06	8.4808e-05
MASTL	ENSG00000120539	1.64593	4.42337	6.10447e-16	1.62861e-14
CEND1	ENSG00000184524	1.6502	2.22568	5.36216e-05	0.000415136
SYNE4	ENSG00000181392	1.65629	3.9301	5.99426e-11	1.07624e-09
LHB	ENSG00000104826	1.65781	3.7586	1.57252e-09	2.45715e-08
MFSD14A	ENSG00000156875	1.65986	2.28052	1.45439e-05	0.000127885
CNNM1	ENSG00000119946	1.66048	2.26704	8.381e-05	0.000618698
RASSF5	ENSG00000266094	1.6656	3.96967	2.17882e-08	2.9827e-07
GEMIN2	ENSG00000092208	1.66692	1.95671	0.000264769	0.0017303
ZP1	ENSG00000149506	1.6697	2.11325	3.41031e-05	0.000274903
PANO1	ENSG00000274897	1.67146	3.58174	8.23685e-08	1.04389e-06
SKIV2L	ENSG00000204351	1.67615	2.40851	9.075e-06	8.33072e-05
CLUH	ENSG00000132361	1.67723	4.18138	2.67357e-10	4.53205e-09
TPI1	ENSG00000111669	1.67998	3.03027	1.85565e-07	2.25439e-06
CLTB	ENSG00000175416	1.68989	2.30087	1.28376e-05	0.000114359
PYCR1	ENSG00000183010	1.69094	2.70065	1.83697e-05	0.000158849
SERINC3	ENSG00000132824	1.69305	1.88453	2.05621e-05	0.000176185
NOS3	ENSG00000164867	1.69307	2.01142	2.45419e-05	0.000205595
TUBA3E	ENSG00000152086	1.69463	2.42162	2.40975e-05	0.000202959
MROH1	ENSG00000179832	1.69567	6.4987	7.89947e-16	2.09559e-14
SLC8B1	ENSG00000089060	1.69856	5.83394	7.20238e-25	3.90969e-23
GRIN3B	ENSG00000116032	1.70675	6.18502	4.43687e-13	9.55658e-12
RASGRP3	ENSG00000152689	1.70746	5.44342	2.79438e-23	1.33208e-21
CTA-246H3.8	ENSG00000230637	1.71349	4.93282	4.31898e-22	1.92225e-20
PAF1	ENSG00000006712	1.7233	4.01359	1.72788e-13	3.86345e-12
MYCBPAP	ENSG00000136449	1.72588	3.26936	5.72576e-07	6.4242e-06
SMG5	ENSG00000198952	1.73027	1.87889	2.14223e-05	0.000182888
NRDC	ENSG00000078618	1.73071	5.58937	3.15835e-25	1.75503e-23
TUBG2	ENSG00000037042	1.73753	2.57416	1.78349e-05	0.000154651
PEX5L	ENSG00000114757	1.73894	4.26825	2.86755e-09	4.37873e-08
AGBL3	ENSG00000146856	1.74071	4.16045	1.70542e-08	2.37621e-07
PPL	ENSG00000118898	1.74578	3.85115	1.41252e-06	1.48378e-05
BTBD18	ENSG00000233436	1.74873	2.32306	1.33795e-05	0.000118311
ZNF526	ENSG00000167625	1.75098	2.324	1.68693e-06	1.75049e-05
ANKHD1-EIF4EBP3	ENSG00000254996	1.75206	3.29732	1.51851e-07	1.86166e-06
AQP6	ENSG00000086159	1.75289	3.59486	1.13839e-08	1.62e-07
FAM159B	ENSG00000145642	1.75838	2.24707	6.18415e-06	5.81918e-05
RP11-723O4.2	ENSG00000231305	1.77066	2.62917	2.95322e-06	2.95039e-05
ANKRD40	ENSG00000154945	1.77375	2.60511	1.11561e-05	0.000100447
TSTD3	ENSG00000228439	1.778	1.97486	1.98478e-05	0.000170687
DDOST	ENSG00000244038	1.78271	1.91064	2.15944e-05	0.000184023
CYP11A1	ENSG00000140459	1.79986	3.15911	5.18777e-09	7.66012e-08
SURF4	ENSG00000148248	1.82021	4.57539	8.36627e-17	2.40268e-15
SLC35A2	ENSG00000102100	1.82051	2.07121	1.15156e-05	0.000103486
SDCBP	ENSG00000137575	1.82478	4.49645	1.54037e-15	4.0071e-14
CDT1	ENSG00000167513	1.82585	2.37313	2.39543e-06	2.42669e-05
IGFL1P1	ENSG00000268879	1.82698	4.76947	8.60521e-19	2.88613e-17
RNF139	ENSG00000170881	1.83102	2.65544	8.33789e-07	9.08366e-06
SLC6A8	ENSG00000130821	1.8338	3.12071	5.84692e-07	6.55232e-06
MYL6B	ENSG00000196465	1.83411	1.95711	1.62606e-06	1.69106e-05
TNFRSF12A	ENSG00000006327	1.83864	2.02517	1.25794e-06	1.33484e-05
LILRB3	ENSG00000204577	1.83876	3.91803	1.65262e-12	3.35199e-11
SH3GLB2	ENSG00000148341	1.83942	2.59966	6.47588e-07	7.18e-06
CTB-33G10.6	ENSG00000268677	1.84528	7.15111	1.52766e-23	7.43331e-22
AGPAT1	ENSG00000204310	1.84608	3.23886	5.84945e-10	9.53684e-09
ZNF784	ENSG00000179922	1.85197	3.22401	4.11e-07	4.70145e-06
RP11-514P8.2	ENSG00000239480	1.85512	3.70362	2.32393e-12	4.68327e-11
KRT81	ENSG00000205426	1.85548	4.5146	3.43895e-18	1.10222e-16
MAN1B1	ENSG00000177239	1.86535	4.45795	9.1481e-17	2.6192e-15
ROM1	ENSG00000149489	1.86836	4.90765	2.27956e-13	5.03701e-12
PHF24	ENSG00000122733	1.87007	2.42616	7.01616e-06	6.54899e-05
KLHL20	ENSG00000076321	1.88004	2.51122	7.0225e-06	6.54899e-05
AP001468.58	ENSG00000228404	1.88263	2.75528	4.0125e-06	3.92515e-05
SPATA4	ENSG00000150628	1.90207	2.48508	3.14628e-06	3.12995e-05
CCNI2	ENSG00000205089	1.91537	2.4349	6.54711e-07	7.25046e-06
CTSZ	ENSG00000101160	1.91952	3.30712	1.53801e-08	2.15574e-07
AP3M1	ENSG00000185009	1.92161	4.73533	2.28126e-20	9.00139e-19
ANO9	ENSG00000185101	1.92707	4.99425	7.11844e-15	1.75457e-13
PAX6	ENSG00000007372	1.9318	4.27515	1.99143e-19	7.16534e-18
TIPIN	ENSG00000075131	1.95248	2.75188	2.42816e-08	3.31436e-07
SLC45A1	ENSG00000162426	1.96751	3.17883	1e-09	1.6503e-08
PRADC1	ENSG00000135617	1.96811	3.43681	2.21433e-11	4.15895e-10
LINC00083	ENSG00000188585	1.98021	3.52286	6.63162e-13	1.40265e-11
SCAMP1	ENSG00000085365	1.99144	3.49404	4.77101e-08	6.30162e-07
CYC1	ENSG00000179091	1.99229	2.97043	6.07707e-08	7.86085e-07
FAM69B	ENSG00000165716	1.99371	7.14234	2.95503e-18	9.50367e-17
FANCC	ENSG00000158169	2.00776	7.24139	1.0036e-33	9.23998e-32
OXA1L	ENSG00000155463	2.01156	2.58521	7.03985e-08	9.00698e-07
IKZF5	ENSG00000095574	2.02513	2.54032	1.11521e-07	1.38714e-06
CCL5	ENSG00000271503	2.04702	3.24714	1.64642e-10	2.85269e-09
BOK	ENSG00000176720	2.05647	2.81717	3.88881e-09	5.85254e-08
LIAS	ENSG00000121897	2.10671	4.22871	5.25698e-18	1.65665e-16
LINC00886	ENSG00000240875	2.10917	3.00009	2.73351e-09	4.18767e-08
DNAJC24	ENSG00000170946	2.11571	2.56162	1.33612e-07	1.6445e-06
WHAMM	ENSG00000156232	2.1206	2.31741	9.2617e-08	1.169e-06
CABLES2	ENSG00000149679	2.12963	2.5203	1.41885e-08	1.99467e-07
CTSW	ENSG00000172543	2.1305	2.46661	6.1516e-08	7.94631e-07
VASH2	ENSG00000143494	2.15516	3.28388	1.47267e-12	3.00649e-11
ATAD3A	ENSG00000197785	2.15698	2.34293	7.43099e-08	9.45588e-07
ERGIC3	ENSG00000125991	2.17814	3.14753	1.89749e-11	3.58538e-10
HMBS	ENSG00000256269	2.18171	1.92945	3.06797e-07	3.58986e-06
THEMIS2	ENSG00000130775	2.18342	2.45587	2.10916e-08	2.89365e-07
LRWD1	ENSG00000161036	2.19373	3.15197	2.20138e-10	3.75875e-09
RAI1	ENSG00000108557	2.20018	3.72026	1.81398e-10	3.11428e-09
STX1A	ENSG00000106089	2.20954	2.939	3.40375e-10	5.65745e-09
HCFC1R1	ENSG00000103145	2.21898	5.5819	2.19001e-25	1.23152e-23
GOLGA2	ENSG00000167110	2.22274	4.47181	4.54936e-25	2.51312e-23
RFC4	ENSG00000163918	2.23736	2.39294	1e-08	1.43373e-07
SPHK2	ENSG00000063176	2.24054	4.66714	7.84881e-27	4.91388e-25
DDX39A	ENSG00000123136	2.2597	5.31252	4.40835e-31	3.42139e-29
ZDHHC12	ENSG00000160446	2.28029	2.89218	1.75955e-10	3e-09
B3GALNT2	ENSG00000162885	2.3081	3.10137	6.41206e-09	9.33577e-08
CORO1B	ENSG00000172725	2.32873	3.13672	3.01402e-10	5.07252e-09
WI2-85898F10.1	ENSG00000235091	2.33358	3.59876	7.60295e-14	1.74998e-12
PRRC2A	ENSG00000204469	2.3519	3.55952	2.06796e-17	6.28486e-16
TMEM175	ENSG00000127419	2.37068	2.28845	1.55536e-08	2.17681e-07
SEMA4B	ENSG00000185033	2.39253	3.0691	3.55773e-09	5.38881e-08
NAT8L	ENSG00000185818	2.40674	2.57806	1.38222e-09	2.17428e-08
TIMM23	ENSG00000265354	2.41853	2.91034	1.48776e-12	3.02414e-11
RP11-192H23.5	ENSG00000265168	2.43197	5.70347	5.16537e-29	3.48979e-27
CCDC188	ENSG00000234409	2.43604	3.11064	1.42474e-07	1.75127e-06
WDR34	ENSG00000119333	2.44436	2.15439	2.85278e-07	3.36142e-06
ANKLE2	ENSG00000176915	2.45012	2.84984	1.7583e-11	3.3358e-10
FSCN2	ENSG00000186765	2.4559	2.82091	3.11371e-10	5.23093e-09
ERN2	ENSG00000134398	2.46633	3.927	1.30343e-19	4.70788e-18
NUDT1	ENSG00000106268	2.47888	2.89049	7.11514e-12	1.38915e-10
CDK11B	ENSG00000248333	2.52333	4.45034	1.05714e-23	5.2527e-22
TM4SF20	ENSG00000168955	2.53393	2.87251	3.32783e-10	5.56079e-09
ANKRD27	ENSG00000105186	2.58714	3.51889	8.39895e-12	1.62964e-10
SLC7A10	ENSG00000130876	2.5976	4.17376	4.75197e-16	1.28235e-14
GRPEL1	ENSG00000109519	2.61168	2.4772	1.04864e-10	1.84071e-09
COA6	ENSG00000168275	2.61484	3.16177	1.58345e-15	4.10298e-14
RP11-31L22.3	ENSG00000255808	2.63033	3.00386	2.3334e-11	4.35645e-10
RP11-533E19.2	ENSG00000261831	2.63081	3.18728	2.76724e-11	5.1358e-10
CCDC78	ENSG00000162004	2.63443	6.16042	1.2698e-25	7.27114e-24
TP53BP2	ENSG00000143514	2.64618	3.4413	1.01854e-16	2.90733e-15
AC005537.2	ENSG00000232006	2.74012	3.70546	7.39818e-12	1.44142e-10
PRPF38A	ENSG00000134748	2.78097	2.51818	2.07463e-12	4.18986e-11
C1orf146	ENSG00000203910	2.78269	2.81245	3.31593e-14	7.8438e-13
SASH3	ENSG00000122122	2.80235	2.88653	1.86635e-14	4.49409e-13
DCST2	ENSG00000163354	2.84043	3.68519	1.88844e-16	5.30969e-15
RP11-655M14.13	ENSG00000255318	2.85455	3.30088	1.60716e-18	5.27723e-17
MANSC4	ENSG00000205693	2.90585	3.31574	1.85065e-17	5.64267e-16
WDR46	ENSG00000227057	2.90954	3.51054	1.52064e-18	5.01066e-17
MYLK3	ENSG00000140795	2.97428	3.6694	7.43776e-14	1.71617e-12
PUSL1	ENSG00000169972	2.9783	3.73794	1.47095e-14	3.57868e-13
SMU1	ENSG00000122692	2.99361	3.15393	2.14551e-18	6.99599e-17
RP11-659E9.2	ENSG00000240915	2.99443	2.74955	4.46102e-15	1.13226e-13
SULT2B1	ENSG00000088002	2.99716	3.29731	1.44277e-18	4.7708e-17
IQSEC3	ENSG00000120645	3.01012	3.9272	1.26585e-09	2e-08
ADCK5	ENSG00000173137	3.02652	3.24612	2.87766e-16	7.90178e-15
SBNO2	ENSG00000064932	3.03583	3.6774	4.72223e-14	1.10315e-12
SLC26A3	ENSG00000091138	3.05162	3.32615	9.8742e-19	3.27663e-17
SLC9A2	ENSG00000115616	3.18215	3.85584	7.53884e-20	2.79831e-18
ZSWIM4	ENSG00000132003	3.18255	3.29952	3.18133e-20	1.22442e-18
NARFL	ENSG00000103245	3.20173	5.7693	4.27355e-43	7.04086e-41
NDUFAB1	ENSG00000004779	3.28878	3.12144	3.78264e-18	1.20826e-16
TMEM63A	ENSG00000196187	3.30192	5.63417	5.08436e-68	3.97894e-65
F10	ENSG00000126218	3.32695	3.74132	1.58628e-24	8.46407e-23
EDF1	ENSG00000107223	3.48473	4.3525	2.68669e-23	1.28728e-21
IER2	ENSG00000160888	3.51943	3.5531	1.13655e-23	5.61755e-22
CELF3	ENSG00000159409	3.64046	4.05867	1.87338e-31	1.50367e-29
IRF5	ENSG00000128604	3.81441	4.24034	3.70156e-40	5.26687e-38
SLC1A7	ENSG00000162383	3.9512	4.39714	1.16605e-43	1.95542e-41
MOV10	ENSG00000155363	4.02237	4.45907	5.76351e-56	1.69141e-53
HIP1R	ENSG00000130787	4.48851	4.72897	1.27281e-65	8.53781e-63
MTIF2	ENSG00000085760	4.55062	4.86686	4.4814e-83	5.26061e-80
SCN3B	ENSG00000166257	4.67289	5.27171	4.64667e-85	6.23384e-82
TMEM104	ENSG00000109066	5.15708	5.31146	3.28988e-64	1.81737e-61
