# Supplementary material for: RNA-Sequencing-Based Transcriptomic Analysis Reveals a Role for Annexin-A1 in Classical and Influenza A Virus-Induced Autophagy
Source: Cells. 2020 Jun 4;9(6):1399. doi: 10.3390/cells9061399 (PMC7349256; doi:10.3390/cells9061399)
Supplement: Supplementary file 1 [file cells-09-01399-s001.zip › cells-804836-revised supplementary/cells-804836 -Table S3 GSEA.xlsx]

## Sheet: WT GSEA
NAME	SIZE
GO_PROTEIN_COMPLEX_BIOGENESIS	36
TAATTA_CHX10_01	15
GO_CIRCULATORY_SYSTEM_DEVELOPMENT	21
MODULE_11	15
GO_MACROMOLECULAR_COMPLEX_ASSEMBLY	43
MODULE_66	15
GO_PROTEIN_COMPLEX_SUBUNIT_ORGANIZATION	46
PEDERSEN_METASTASIS_BY_ERBB2_ISOFORM_7	15
GO_OXIDATION_REDUCTION_PROCESS	17
GO_REPRODUCTIVE_SYSTEM_DEVELOPMENT	15
GO_NEGATIVE_REGULATION_OF_DEVELOPMENTAL_PROCESS	23
GO_HEART_DEVELOPMENT	16
GO_ESTABLISHMENT_OF_PROTEIN_LOCALIZATION	52
WAKABAYASHI_ADIPOGENESIS_PPARG_RXRA_BOUND_8D	32
ACCAAAG_MIR9	16
WONG_ADULT_TISSUE_STEM_MODULE	22
GO_POSITIVE_REGULATION_OF_PROTEIN_METABOLIC_PROCESS	49
YATTNATC_UNKNOWN	15
GO_REGULATION_OF_KINASE_ACTIVITY	15
GO_REGULATION_OF_TRANSFERASE_ACTIVITY	24

## Sheet: KO GSEA
NAME	SIZE
LOPEZ_MBD_TARGETS	20
GO_POSITIVE_REGULATION_OF_HYDROLASE_ACTIVITY	29
GO_RIBONUCLEOPROTEIN_COMPLEX	17
STARK_PREFRONTAL_CORTEX_22Q11_DELETION_DN	17
GARY_CD5_TARGETS_DN	15
CHR19Q13	15
ZWANG_CLASS_1_TRANSIENTLY_INDUCED_BY_EGF	18
